# Supplementary material for: “Jack‐of‐all‐trades” is parthenogenetic
Source: PubMed Central journal article supplement (PMC9219104; doi:10.1002/ece3.9036), 2022-06-23
Supplement: ECE3-12-e9036-s001.pdf [file ECE3-12-e9036-s001.pdf]

**Appendix; Table1.** The geographic regions of the occurrence of oribatid mites according to Subías (2022), their size (km<sup>2</sup>) and the internet source from which the respective size of each region was extracted.

| <b>Region (Subías 2022)</b>          | <b>Region (English)</b>                 | <b>Area (km<sup>2</sup>)</b> |
|--------------------------------------|-----------------------------------------|------------------------------|
| África centrooriental                | Africa (Central Eastern)                | 4,350,015                    |
| África occidental                    | Africa (Western)                        | 6,409,409                    |
| África oriental                      | Africa (Eastern)                        | 7,670,709                    |
| Alaska                               | U.S.A. (Alaska)                         | 1,717,854                    |
| Alemania                             | Germany                                 | 348,672                      |
| Alpine                               | Alpine bioms                            | 3,560,000                    |
| Angola                               | Angola                                  | 1,246,700                    |
| Antártica                            | Antarctica                              | 14,000,000                   |
| Argentina                            | Argentina                               | 2,736,690                    |
| Arunachal Pradesh                    | India (Arunachal Pradesh)               | 83,743                       |
| Asia centrooccidental                | Asia (Western-Central)                  | 1,334,484                    |
| Australia                            | Australia (country)                     | 7,682,300                    |
| Australiana                          | Australasia (realm)                     | 7,700,000                    |
| Azores                               | Azores                                  | 2,351                        |
| Bali                                 | Bali                                    | 5,780                        |
| Bengala occidental                   | India (West Bengal)                     | 88,752                       |
| Bolivia                              | Bolivia                                 | 1,083,301                    |
| Boreal                               | Boreal Zone                             | 19,500,000                   |
| Boreal (excepto Paleártica oriental) | Boreal Zone (except Eastern Palearctic) | 6,580,586                    |
| Boreoalpina                          | Boreal & Alpine zone                    | 78,249,340                   |
| Boreoalpina: Euroatlántica           | Boreoalpine zone                        | 385,207                      |
| Borneo                               | Borneo                                  | 751,936                      |
| Brasil                               | Brasil                                  | 8,358,140                    |
| Bután                                | Butan                                   | 38,394                       |
| Cachemira                            | Kashmir (region)                        | 222,000                      |
| California                           | U.S.A. (California)                     | 163,696                      |
| Camboya                              | Cambodia                                | 181,035                      |
| Camerún                              | Cameroon                                | 472,710                      |
| Canadá                               | Canada                                  | 9,093,507                    |

|                                                |                                        |             |
|------------------------------------------------|----------------------------------------|-------------|
| Canarias                                       | Canary Islands                         | 7,492       |
| Carolina del Norte                             | U.S.A. (North Carolina)                | 139,389     |
| Cáucaso                                        | Caucasus                               | 400,000     |
| Ceilán/Sri Lanka                               | Sri Lanka                              | 64,630      |
| Centroamérica                                  | Central America (excl. Mexico)         | 521,876     |
| Chad                                           | Chad                                   | 1,259,200   |
| Chile                                          | Chile                                  | 743,812     |
| China suroriental                              | China (South-Eastern)                  | 1,837,108   |
| Colombia                                       | Colombia                               | 1,038,700   |
| Congo                                          | Congo (DRC)                            | 2,344,858   |
| Corea                                          | Korean Peninsula                       | 213,019     |
| Cosmopolita                                    | Cosmopolitan                           | 148,940,000 |
| Costa Rica                                     | Costa Rica                             | 51,100      |
| Crimea                                         | Crimea                                 | 26,844      |
| Crozet                                         | Crozet Islands                         | 352         |
| Cuba                                           | Cuba                                   | 109,820     |
| Ecuador                                        | Ecuador                                | 283,561     |
| Egipto                                         | Egypt                                  | 1,001,449   |
| El Salvador                                    | El Salvador                            | 21,041      |
| Este de Paleártica oriental                    | Palaearctic (Eastern part of the East) | 6,011,111   |
| Este de Rusia asiática/ Este de Rusia oriental | Russia (East of Asian)                 | 6,952,600   |
| Este de U.S.A.                                 | U.S.A. (Eastern)                       | 1,791,708   |
| Etiopía                                        | Ethiopia (country)                     | 1,000,000   |
| Etiópica                                       | Afrotropic = Ethiopic (realm)          | 22,100,000  |
| Europa                                         | Europe                                 | 10,180,000  |
| Europa central                                 | Europe (Central)                       | 990,489     |
| Europa centro meridional                       | Europe (Central-Southern)              | 294,507     |
| Europa centro occidental                       | Europe (Central-Western)               | 247,622     |
| Europa meridional                              | Europe (Southern)                      | 1,317,044   |
| Europa occidental/Oeste de Europa              | Europe (Western)                       | 1,088,001   |
| Europa: excepto Norte                          | Europe (excl. Northern)                | 9,018,924   |
| Europa: Norte                                  | Europe (Northern)                      | 1,161,076   |
| Fiji                                           | Fiji                                   | 18,274      |

|                            |                                   |            |
|----------------------------|-----------------------------------|------------|
| Filipinas                  | Philippines                       | 298,170    |
| Florida                    | U.S.A. (Florida)                  | 170,304    |
| Galápagos                  | Galapagos Islands                 | 8,010      |
| Georgia del Sur            | South Georgia Islands             | 3,756      |
| Ghana                      | Ghana                             | 227,533    |
| Groenlandia                | Greenland                         | 2,166,086  |
| Hawái                      | U.S.A. (Hawaii)                   | 16,625     |
| Himalaya                   | Himalaya                          | 600,000    |
| Holanda                    | Holland                           | 7,511      |
| Holártica                  | Holarctic = Palearctic & Nearctic | 77,000,000 |
| Holártica meridional       | Holarctic (Southern)              | 23,927,119 |
| I. Ámsterdam               | Amsterdam Island/New Amsterdam    | 55         |
| I. Mauricio                | Mauritius                         | 2,040      |
| I. San Pablo               | Saint Paul Island                 | 6          |
| Illinois                   | U.S.A. (Illinois)                 | 149,998    |
| India                      | India                             | 3,287,469  |
| Indonesia                  | Indonesia                         | 1,904,569  |
| Irán                       | Iran                              | 1,531,595  |
| Islás Británicas           | British Isles                     | 307,890    |
| Islas de Pacifico          | Pacific Islands                   | 1,252,700  |
| Italia                     | Italy                             | 301,338    |
| Japón                      | Japan                             | 377,975    |
| Java                       | Java                              | 126,700    |
| Kenia                      | Kenya                             | 569,140    |
| Kerala                     | India (Kerala)                    | 38,863     |
| Kuriles                    | Kuril Islands                     | 10,503     |
| La Española: R. Dominicana | Dominican Republic                | 48,442     |
| Laos                       | Laos                              | 236,800    |
| Lombok                     | Lombok                            | 4,725      |
| Luisiana                   | U.S.A. (Louisiana)                | 134,264    |
| Malgache                   | Madagascar                        | 581,540    |
| Marianas                   | Mariana Islands                   | 477        |
| Mediterránea               | Mediterranean Basin               | 2,085,292  |

|                            |                               |            |
|----------------------------|-------------------------------|------------|
| Mediterránea occidental    | Mediterranean Basin (Western) | 1,390,194  |
| Mediterránea oriental      | Mediterranean Basin (Eastern) | 695,097    |
| Megalaya                   | India (Meghalaya)             | 22,429     |
| Méjico                     | Mexico                        | 1,972,550  |
| Melanesia                  | Melanesia                     | 940,000    |
| Michigan                   | U.S.A. (Michigan)             | 250,494    |
| Minesota                   | U.S.A. (Minnesota)            | 225,171    |
| Mongolia                   | Mongolia                      | 1,566,000  |
| Neártica                   | Nearctic                      | 22,900,000 |
| Neártica austral           | Nearctic (Southern)           | 5,893,786  |
| Neártica nororiental       | Nearctic (North Eastern)      | 2,166,086  |
| Neártica occidental        | Nearctic (Western)            | 7,633,333  |
| Neártica oriental          | Nearctic (Eastern)            | 7,633,333  |
| Neártica septentrional     | Nearctic (Northern)           | 11,704,690 |
| Neotropical                | Neotropic                     | 19,000,000 |
| Neotropical austral        | Neotropic (Southern)          | 5,067,041  |
| Nepal                      | Nepal                         | 147,516    |
| Nigeria                    | Nigeria                       | 923,768    |
| Noreste China              | China (North-Eastern)         | 793,300    |
| Noreste de India           | India (North-East)            | 262,230    |
| Noreste de Oriental        | Oriental (North-Eastern)      | 3,099,270  |
| Noroeste de Siberia        | Russia (Northwest of Siberia) | 788,932    |
| Norte de India             | India (North)                 | 1,421,000  |
| Norte de Neotropical       | Neotropic (Northern)          | 905,400    |
| Norte de Oriental          | Oriental (Northern)           | 4,070,156  |
| Nueva Guinea               | New Guinea                    | 786,000    |
| Nueva York                 | U.S.A. (New York)             | 141,300    |
| Nueva Zelanda              | New Zealand                   | 264,537    |
| Nuevas Hébridias [Vanuatu] | Vanuatu                       | 12,190     |
| Nuevo Méjico               | U.S.A. (New Mexico)           | 314,915    |
| Oeste de Siberia           | Russia (Western Siberia)      | 1,714,984  |
| Oriental                   | Oriental = Indomalaya (realm) | 7,500,000  |
| Orissa                     | India (Odisha)                | 155,707    |

|                                       |                                     |            |
|---------------------------------------|-------------------------------------|------------|
| Paleártica                            | Palaearctic                         | 54,100,000 |
| Paleártica (excepto Este)             | Palaearctic (excl. East)            | 36,066,667 |
| Paleártica centromeridional           | Palaearctic (Southern Central)      | 6,011,111  |
| Paleártica meridional                 | Palaearctic (Southern)              | 18,033,333 |
| Paleártica occidental                 | Palaearctic (Western)               | 18,033,333 |
| Paleártica occidental (excepto Norte) | Palaearctic (Western except North)  | 12,022,222 |
| Paleártica oriental                   | Palaearctic (Eastern)               | 18,033,333 |
| Paleártica oriental (excepto Norte)   | Palaearctic (Eastern excl. North)   | 12,022,222 |
| Paleártica oriental meridional        | Palaearctic (South of Eastern)      | 6,011,111  |
| Paleártica oriental: excepto Este     | Palaearctic East (excl. East)       | 12,022,222 |
| Panamá                                | Panama                              | 75,417     |
|                                       |                                     |            |
| Pantropical                           | Pantropical                         | 27,604,311 |
| Pantropical excepto Australiana       | Pantropical (excl. Australiana)     | 40,900,000 |
|                                       |                                     |            |
| Pantropical excepto Etiopica          | Pantropical (excl. Afrotropic)      | 18,596,756 |
| Pantropical y Subtropical             | Pantropical & Subtropical           | 81,935,554 |
| Paquistán                             | Pakistan                            | 796,095    |
| Paraguay                              | Paraguay                            | 406,752    |
| Península Arábigua                    | Arabian Peninsula                   | 3,237,500  |
| Península Malaya                      | Malaya Peninsula                    | 242,364    |
| Pequeñas Antillas                     | Lesser Antilles                     | 13,887     |
| Perú                                  | Peru                                | 1,279,996  |
| Polinesia                             | Polynesia                           | 294,000    |
| Polonia                               | Poland                              | 312,696    |
| Príncipe Eduardo                      | Prince Edward Island (South Africa) | 45         |
| Reunión                               | Reunión                             | 2,504      |
| Ruanda                                | Ruanda                              | 26,338     |
| Sahara occidental                     | Western Sahara                      | 266,000    |
| Samoa                                 | Samoa                               | 2,842      |
| Santa Helena                          | St. Helena                          | 123        |

|                       |                                |            |
|-----------------------|--------------------------------|------------|
| Senegal               | Senegal                        | 192,530    |
| Seychelles            | Seychelles                     | 455        |
| Shetland del Sur      | South Shetland Islands         | 4,700      |
| Sicilia               | Sicily                         | 25,426     |
| Sikkim                | India (Sikkim)                 | 7,096      |
| Somalia               | Somalia                        | 637,657    |
|                       |                                |            |
| Subtropical           | Subtropical                    | 54,331,243 |
| Sudáfrica             | South Africa (country)         | 1,214,470  |
| Sudamérica            | South America                  | 17,843,000 |
| Suiza                 | Switzerland                    | 41,285     |
| Sumatra               | Sumatra                        | 473,481    |
| Sur de Siberia        | Russia (Southern Siberia)      | 2,572,477  |
| Sureste de U.S.A.     | U.S.A. (South-Eastern)         | 1,504,355  |
| Suroeste de Siberia   | Russia (South Western Siberia) | 774,846    |
| Tahití                | Tahiti                         | 1,044      |
| Tailandia             | Thailand                       | 513,115    |
| Taiwan                | Taiwan                         | 36,197     |
| Tanzania              | Tanzania                       | 945,087    |
| Tejas                 | U.S.A. (Texas)                 | 695,621    |
| Tonga                 | Tonga                          | 750        |
| Tripura               | India (Tripura)                | 10,492     |
| Tristan da Cunha      | Tristan da Cunha               | 180        |
| Túnez                 | Tunisia                        | 163,610    |
| U.S.A.                | U.S.A.                         | 9,826,675  |
| U.S.A. centrooriental | U.S.A. (Eastern-Central)       | 2,870,721  |
| U.S.A. meridional     | U.S.A. (Southern)              | 2,108,407  |
| U.S.A. oriental       | U.S.A. (Eastern)               | 2,276,528  |
| Uruguay               | Uruguay                        | 176,215    |
| Uttar Pradesh         | India (Uttar Pradesh)          | 240,928    |
| Venezuela             | Venezuela                      | 912,050    |
| Vietnam               | Vietnam                        | 331,212    |

|          |                   |         |
|----------|-------------------|---------|
| Virginia | U.S.A. (Virginia) | 110,785 |
| Zambia   | Zambia            | 752,618 |

\* 'estimated based on previously defined data' means that some areas were calculated from previously

Körner, C., Urbach, D., Paulsen, J. (2021) Mountain definitions and their consequences. *Alpine Botany* 13

Subías, L. S. (2022). Listado sistemático, sinonímico y biogeográfico de los ácaros oribátidos (Acariformes:

Testolin, R., Attorre, F., Jiménez-Alfaro, B. (2020) Global distribution and bioclimatic characterization of :

, their English translation,

| Source                                                                                                                                  |
|-----------------------------------------------------------------------------------------------------------------------------------------|
| <a href="https://es.wikipedia.org/wiki/África_Oriental">https://es.wikipedia.org/wiki/África_Oriental</a>                               |
| <a href="https://es.wikipedia.org/wiki/África_Occidental">https://es.wikipedia.org/wiki/África_Occidental</a>                           |
| <a href="https://es.wikipedia.org/wiki/Yibuti">https://es.wikipedia.org/wiki/Yibuti</a>                                                 |
| <a href="https://de.wikipedia.org/wiki/Alaska">https://de.wikipedia.org/wiki/Alaska</a>                                                 |
| <a href="https://de.wikipedia.org/wiki/Deutschland">https://de.wikipedia.org/wiki/Deutschland</a>                                       |
| Testolin et al. (2021) Ecography. doi.org/10.1111/ecog.05012                                                                            |
| <a href="https://de.wikipedia.org/wiki/Angola">https://de.wikipedia.org/wiki/Angola</a>                                                 |
| <a href="https://de.wikipedia.org/wiki/Antarktika">https://de.wikipedia.org/wiki/Antarktika</a>                                         |
| <a href="https://en.wikipedia.org/wiki/Argentina">https://en.wikipedia.org/wiki/Argentina</a>                                           |
| <a href="https://de.wikipedia.org/wiki/Arunachal_Pradesh">https://de.wikipedia.org/wiki/Arunachal_Pradesh</a>                           |
| <a href="https://en.wikipedia.org/wiki/Central_Asia">https://en.wikipedia.org/wiki/Central_Asia</a>                                     |
| <a href="https://en.wikipedia.org/wiki/Australia">https://en.wikipedia.org/wiki/Australia</a>                                           |
| <a href="https://simple.wikipedia.org/wiki/Ecozone">https://simple.wikipedia.org/wiki/Ecozone</a>                                       |
| <a href="https://de.wikipedia.org/wiki/Azoren">https://de.wikipedia.org/wiki/Azoren</a>                                                 |
| <a href="https://de.wikipedia.org/wiki/Bali">https://de.wikipedia.org/wiki/Bali</a>                                                     |
| <a href="https://en.wikipedia.org/wiki/West_Bengal">https://en.wikipedia.org/wiki/West_Bengal</a>                                       |
| <a href="https://en.wikipedia.org/wiki/Bolivia">https://en.wikipedia.org/wiki/Bolivia</a>                                               |
| <a href="https://geohilfe.de/oekozonen-nach-schultz/die-boreale-zone/">https://geohilfe.de/oekozonen-nach-schultz/die-boreale-zone/</a> |
| <a href="https://de.wikipedia.org/wiki/Boreale_Zone">https://de.wikipedia.org/wiki/Boreale_Zone</a>                                     |
| Körner et al. (2021) Alpine Botany. doi.10.1007/s00035-011-0094-4                                                                       |
| <a href="https://de.wikipedia.org/wiki/Norwegen">https://de.wikipedia.org/wiki/Norwegen</a>                                             |
| <a href="https://de.wikipedia.org/wiki/Borneo">https://de.wikipedia.org/wiki/Borneo</a>                                                 |
| <a href="https://en.wikipedia.org/wiki/Brazil">https://en.wikipedia.org/wiki/Brazil</a>                                                 |
| <a href="https://de.wikipedia.org/wiki/Bhutan">https://de.wikipedia.org/wiki/Bhutan</a>                                                 |
| <a href="https://de.wikipedia.org/wiki/Kaschmir">https://de.wikipedia.org/wiki/Kaschmir</a>                                             |
| <a href="https://en.wikipedia.org/wiki/California">https://en.wikipedia.org/wiki/California</a>                                         |
| <a href="https://en.wikipedia.org/wiki/Cambodia">https://en.wikipedia.org/wiki/Cambodia</a>                                             |
| <a href="https://en.wikipedia.org/wiki/Cameroon">https://en.wikipedia.org/wiki/Cameroon</a>                                             |
| <a href="https://en.wikipedia.org/wiki/Canada">https://en.wikipedia.org/wiki/Canada</a>                                                 |



|                                                                                                                                             |
|---------------------------------------------------------------------------------------------------------------------------------------------|
| <a href="https://de.wikipedia.org/wiki/Kanarische_Inseln">https://de.wikipedia.org/wiki/Kanarische_Inseln</a>                               |
| <a href="https://de.wikipedia.org/wiki/North_Carolina">https://de.wikipedia.org/wiki/North_Carolina</a>                                     |
| <a href="https://de.wikipedia.org/wiki/Kaukasus">https://de.wikipedia.org/wiki/Kaukasus</a>                                                 |
| <a href="https://en.wikipedia.org/wiki/Sri_Lanka">https://en.wikipedia.org/wiki/Sri_Lanka</a>                                               |
| <a href="https://de.wikipedia.org/wiki/Zentralamerika">https://de.wikipedia.org/wiki/Zentralamerika</a>                                     |
| <a href="https://en.wikipedia.org/wiki/Chad">https://en.wikipedia.org/wiki/Chad</a>                                                         |
| <a href="https://en.wikipedia.org/wiki/Chile">https://en.wikipedia.org/wiki/Chile</a>                                                       |
| <a href="https://de.wikipedia.org/wiki/Regionen_Chinas">https://de.wikipedia.org/wiki/Regionen_Chinas</a>                                   |
| <a href="https://en.wikipedia.org/wiki/Colombia">https://en.wikipedia.org/wiki/Colombia</a>                                                 |
| <a href="https://de.wikipedia.org/wiki/Demokratische_Republik_Kongo">https://de.wikipedia.org/wiki/Demokratische_Republik_Kongo</a>         |
| <a href="https://en.wikipedia.org/wiki/Korea">https://en.wikipedia.org/wiki/Korea</a>                                                       |
| sum of all regions - Wikipedia                                                                                                              |
| <a href="https://de.wikipedia.org/wiki/Costa_Rica">https://de.wikipedia.org/wiki/Costa_Rica</a>                                             |
| <a href="https://de.wikipedia.org/wiki/Krim">https://de.wikipedia.org/wiki/Krim</a>                                                         |
| <a href="https://de.wikipedia.org/wiki/Crozetinseln">https://de.wikipedia.org/wiki/Crozetinseln</a>                                         |
| <a href="https://en.wikipedia.org/wiki/Cuba">https://en.wikipedia.org/wiki/Cuba</a>                                                         |
| <a href="https://de.wikipedia.org/wiki/Ecuador">https://de.wikipedia.org/wiki/Ecuador</a>                                                   |
| <a href="https://de.wikipedia.org/wiki/Ägypten">https://de.wikipedia.org/wiki/Ägypten</a>                                                   |
| <a href="https://de.wikipedia.org/wiki/El_Salvador">https://de.wikipedia.org/wiki/El_Salvador</a>                                           |
| estimated based on previously defined data*                                                                                                 |
| <a href="https://en.wikipedia.org/wiki/Siberia#Geomorphological_regions">https://en.wikipedia.org/wiki/Siberia#Geomorphological_regions</a> |
| <a href="https://en.wikipedia.org/wiki/Eastern_Time_Zone">https://en.wikipedia.org/wiki/Eastern_Time_Zone</a>                               |
| <a href="https://en.wikipedia.org/wiki/Ethiopia">https://en.wikipedia.org/wiki/Ethiopia</a>                                                 |
| <a href="https://simple.wikipedia.org/wiki/Ecozone">https://simple.wikipedia.org/wiki/Ecozone</a>                                           |
| <a href="https://en.wikipedia.org/wiki/Europe">https://en.wikipedia.org/wiki/Europe</a>                                                     |
| <a href="https://en.wikipedia.org/wiki/Central_Europe">https://en.wikipedia.org/wiki/Central_Europe</a>                                     |
| <a href="https://en.wikipedia.org/wiki/Central_Europe">https://en.wikipedia.org/wiki/Central_Europe</a>                                     |
| estimated based on previous defined data                                                                                                    |
| <a href="https://es.wikipedia.org/wiki/Europa_meridional">https://es.wikipedia.org/wiki/Europa_meridional</a>                               |
| <a href="https://es.wikipedia.org/wiki/Europa_Occidental">https://es.wikipedia.org/wiki/Europa_Occidental</a>                               |
| estimated based on previously defined data*                                                                                                 |
| <a href="https://www.laenderdaten.de/geographie/flaeche_staaten.aspx">https://www.laenderdaten.de/geographie/flaeche_staaten.aspx</a>       |
| <a href="https://en.wikipedia.org/wiki/Fiji">https://en.wikipedia.org/wiki/Fiji</a>                                                         |

|                                                                                                                                                     |
|-----------------------------------------------------------------------------------------------------------------------------------------------------|
| <a href="https://en.wikipedia.org/wiki/Philippines">https://en.wikipedia.org/wiki/Philippines</a>                                                   |
| <a href="https://de.wikipedia.org/wiki/Florida">https://de.wikipedia.org/wiki/Florida</a>                                                           |
| <a href="https://de.wikipedia.org/wiki/Galapagosinseln">https://de.wikipedia.org/wiki/Galapagosinseln</a>                                           |
| <a href="https://es.wikipedia.org/wiki/Islas_Georgias_del_Sur">https://es.wikipedia.org/wiki/Islas_Georgias_del_Sur</a>                             |
| <a href="https://en.wikipedia.org/wiki/Ghana">https://en.wikipedia.org/wiki/Ghana</a>                                                               |
| <a href="https://en.wikipedia.org/wiki/Greenland">https://en.wikipedia.org/wiki/Greenland</a>                                                       |
| <a href="https://de.wikipedia.org/wiki/Hawaii">https://de.wikipedia.org/wiki/Hawaii</a>                                                             |
| <a href="https://es.wikipedia.org/wiki/Himalaya">https://es.wikipedia.org/wiki/Himalaya</a>                                                         |
| <a href="https://en.wikipedia.org/wiki/Holland">https://en.wikipedia.org/wiki/Holland</a>                                                           |
| <a href="https://en.wikipedia.org/wiki/Holarctic_realm">https://en.wikipedia.org/wiki/Holarctic_realm</a>                                           |
| estimated based on previously defined data*                                                                                                         |
| <a href="https://en.wikipedia.org/wiki/Île_Amsterdam">https://en.wikipedia.org/wiki/Île_Amsterdam</a>                                               |
| <a href="https://en.wikipedia.org/wiki/Mauritius">https://en.wikipedia.org/wiki/Mauritius</a>                                                       |
| <a href="https://en.wikipedia.org/wiki/Île_Saint-Paul">https://en.wikipedia.org/wiki/Île_Saint-Paul</a>                                             |
| <a href="https://de.wikipedia.org/wiki/Illinois">https://de.wikipedia.org/wiki/Illinois</a>                                                         |
| <a href="https://en.wikipedia.org/wiki/Geography_of_India">https://en.wikipedia.org/wiki/Geography_of_India</a>                                     |
| <a href="https://en.wikipedia.org/wiki/Indonesia">https://en.wikipedia.org/wiki/Indonesia</a>                                                       |
| <a href="https://en.wikipedia.org/wiki/Iran">https://en.wikipedia.org/wiki/Iran</a>                                                                 |
| <a href="https://de.wikipedia.org/wiki/Britische_Inseln">https://de.wikipedia.org/wiki/Britische_Inseln</a>                                         |
| <a href="https://en.wikipedia.org/wiki/List_of_islands_in_the_Pacific_Ocean">https://en.wikipedia.org/wiki/List_of_islands_in_the_Pacific_Ocean</a> |
| <a href="https://de.wikipedia.org/wiki/Italien">https://de.wikipedia.org/wiki/Italien</a>                                                           |
| <a href="https://en.wikipedia.org/wiki/Japan">https://en.wikipedia.org/wiki/Japan</a>                                                               |
| <a href="https://de.wikipedia.org/wiki/Java_(Insel)">https://de.wikipedia.org/wiki/Java_(Insel)</a>                                                 |
| <a href="https://en.wikipedia.org/wiki/Kenya">https://en.wikipedia.org/wiki/Kenya</a>                                                               |
| <a href="https://en.wikipedia.org/wiki/Kerala">https://en.wikipedia.org/wiki/Kerala</a>                                                             |
| <a href="https://en.wikipedia.org/wiki/Kuril_Islands">https://en.wikipedia.org/wiki/Kuril_Islands</a>                                               |
| <a href="https://es.wikipedia.org/wiki/República_Dominicana">https://es.wikipedia.org/wiki/República_Dominicana</a>                                 |
| <a href="https://de.wikipedia.org/wiki/Laos">https://de.wikipedia.org/wiki/Laos</a>                                                                 |
| <a href="https://de.wikipedia.org/wiki/Lombok">https://de.wikipedia.org/wiki/Lombok</a>                                                             |
| <a href="https://de.wikipedia.org/wiki/Louisiana">https://de.wikipedia.org/wiki/Louisiana</a>                                                       |
| <a href="https://en.wikipedia.org/wiki/Madagascar">https://en.wikipedia.org/wiki/Madagascar</a>                                                     |
| <a href="https://en.wikipedia.org/wiki/Mariana_Islands">https://en.wikipedia.org/wiki/Mariana_Islands</a>                                           |
| <a href="https://en.wikipedia.org/wiki/Mediterranean_Basin">https://en.wikipedia.org/wiki/Mediterranean_Basin</a>                                   |

|                                                                                                                                                                                                                                                                     |
|---------------------------------------------------------------------------------------------------------------------------------------------------------------------------------------------------------------------------------------------------------------------|
| estimated based on previously defined data*                                                                                                                                                                                                                         |
| estimated based on previously defined data*                                                                                                                                                                                                                         |
| <a href="https://de.wikipedia.org/wiki/Meghalaya">https://de.wikipedia.org/wiki/Meghalaya</a>                                                                                                                                                                       |
| <a href="https://en.wikipedia.org/wiki/Mexico">https://en.wikipedia.org/wiki/Mexico</a>                                                                                                                                                                             |
| <a href="https://de.wikipedia.org/wiki/Melanesien">https://de.wikipedia.org/wiki/Melanesien</a>                                                                                                                                                                     |
| <a href="https://de.wikipedia.org/wiki/Michigan">https://de.wikipedia.org/wiki/Michigan</a>                                                                                                                                                                         |
| <a href="https://de.wikipedia.org/wiki/Minnesota">https://de.wikipedia.org/wiki/Minnesota</a>                                                                                                                                                                       |
| <a href="https://en.wikipedia.org/wiki/Mongolia">https://en.wikipedia.org/wiki/Mongolia</a>                                                                                                                                                                         |
| <a href="https://simple.wikipedia.org/wiki/Ecozone">https://simple.wikipedia.org/wiki/Ecozone</a>                                                                                                                                                                   |
| <a href="https://de.wikipedia.org/wiki/Liste_der_Bundesstaaten_der_Vereinigten_Staaten">https://de.wikipedia.org/wiki/Liste_der_Bundesstaaten_der_Vereinigten_Staaten</a> , <a href="https://de.wikipedia.org/wiki/Mexiko">https://de.wikipedia.org/wiki/Mexiko</a> |
| estimated based on previously defined data*                                                                                                                                                                                                                         |
| estimated based on previously defined data*                                                                                                                                                                                                                         |
| estimated based on previously defined data*                                                                                                                                                                                                                         |
| estimated based on previously defined data*                                                                                                                                                                                                                         |
| <a href="https://simple.wikipedia.org/wiki/Ecozone">https://simple.wikipedia.org/wiki/Ecozone</a>                                                                                                                                                                   |
| sum of Falkland Islands, Argentina, Chile, Uruguay, Paraguay, Southern Brazil                                                                                                                                                                                       |
| <a href="https://en.wikipedia.org/wiki/Nepal">https://en.wikipedia.org/wiki/Nepal</a>                                                                                                                                                                               |
| <a href="https://de.wikipedia.org/wiki/Nigeria">https://de.wikipedia.org/wiki/Nigeria</a>                                                                                                                                                                           |
| <a href="https://de.wikipedia.org/wiki/Regionen_Chinas">https://de.wikipedia.org/wiki/Regionen_Chinas</a>                                                                                                                                                           |
| <a href="https://es.wikipedia.org/wiki/Noreste_de_India">https://es.wikipedia.org/wiki/Noreste_de_India</a>                                                                                                                                                         |
| <a href="https://en.wikipedia.org/wiki/Indomalayan_realm#/media/File:Ecozone_Indomalaya.svg">https://en.wikipedia.org/wiki/Indomalayan_realm#/media/File:Ecozone_Indomalaya.svg</a>                                                                                 |
| <a href="https://de.wikipedia.org/wiki/Sibirien_(Föderationskreis)">https://de.wikipedia.org/wiki/Sibirien_(Föderationskreis)</a>                                                                                                                                   |
| <a href="https://en.wikipedia.org/wiki/North_India">https://en.wikipedia.org/wiki/North_India</a>                                                                                                                                                                   |
| <a href="https://en.wikipedia.org/wiki/Neotropical_realm">https://en.wikipedia.org/wiki/Neotropical_realm</a>                                                                                                                                                       |
| <a href="https://en.wikipedia.org/wiki/Indomalayan_realm">https://en.wikipedia.org/wiki/Indomalayan_realm</a>                                                                                                                                                       |
| <a href="https://de.wikipedia.org/wiki/Neuguinea">https://de.wikipedia.org/wiki/Neuguinea</a>                                                                                                                                                                       |
| <a href="https://de.wikipedia.org/wiki/New_York_(Bundesstaat)">https://de.wikipedia.org/wiki/New_York_(Bundesstaat)</a>                                                                                                                                             |
| <a href="https://en.wikipedia.org/wiki/New_Zealand">https://en.wikipedia.org/wiki/New_Zealand</a>                                                                                                                                                                   |
| <a href="https://de.wikipedia.org/wiki/Vanuatu">https://de.wikipedia.org/wiki/Vanuatu</a>                                                                                                                                                                           |
| <a href="https://de.wikipedia.org/wiki/New_Mexico">https://de.wikipedia.org/wiki/New_Mexico</a>                                                                                                                                                                     |
| <a href="https://de.wikipedia.org/wiki/Sibirien_(Föderationskreis)">https://de.wikipedia.org/wiki/Sibirien_(Föderationskreis)</a>                                                                                                                                   |
| <a href="https://simple.wikipedia.org/wiki/Ecozone">https://simple.wikipedia.org/wiki/Ecozone</a>                                                                                                                                                                   |
| <a href="https://en.wikipedia.org/wiki/Odisha">https://en.wikipedia.org/wiki/Odisha</a>                                                                                                                                                                             |

|                                                                                                                                                                                                                                                                                                                                                                                                                                                                                                                             |
|-----------------------------------------------------------------------------------------------------------------------------------------------------------------------------------------------------------------------------------------------------------------------------------------------------------------------------------------------------------------------------------------------------------------------------------------------------------------------------------------------------------------------------|
| <a href="https://simple.wikipedia.org/wiki/Ecozone">https://simple.wikipedia.org/wiki/Ecozone</a>                                                                                                                                                                                                                                                                                                                                                                                                                           |
| estimated based on previously defined data*                                                                                                                                                                                                                                                                                                                                                                                                                                                                                 |
| estimated based on previously defined data*                                                                                                                                                                                                                                                                                                                                                                                                                                                                                 |
| estimated based on previously defined data*                                                                                                                                                                                                                                                                                                                                                                                                                                                                                 |
| estimated based on previously defined data*                                                                                                                                                                                                                                                                                                                                                                                                                                                                                 |
| estimated based on previously defined data*                                                                                                                                                                                                                                                                                                                                                                                                                                                                                 |
| estimated based on previously defined data*                                                                                                                                                                                                                                                                                                                                                                                                                                                                                 |
| estimated based on previously defined data*                                                                                                                                                                                                                                                                                                                                                                                                                                                                                 |
| estimated based on previously defined data*                                                                                                                                                                                                                                                                                                                                                                                                                                                                                 |
| estimated based on previously defined data*                                                                                                                                                                                                                                                                                                                                                                                                                                                                                 |
| <a href="https://en.wikipedia.org/wiki/Panama">https://en.wikipedia.org/wiki/Panama</a>                                                                                                                                                                                                                                                                                                                                                                                                                                     |
| Estimated based on sources: <a href="https://worldmap.harvard.edu/maps/19173">https://worldmap.harvard.edu/maps/19173</a> ,<br><a href="https://www.ncbi.nlm.nih.gov/pmc/articles/PMC6207062/">https://www.ncbi.nlm.nih.gov/pmc/articles/PMC6207062/</a> , <a href="https://de.wikipedia.org/wiki/Datei:Subtropical.png">https://de.wikipedia.org/wiki/Datei:Subtropical.png</a><br><a href="http://koeppen-geiger.vu-wien.ac.at/pics/Geiger_1954_Map.jpg">http://koeppen-geiger.vu-wien.ac.at/pics/Geiger_1954_Map.jpg</a> |
| estimated based on previously defined data*                                                                                                                                                                                                                                                                                                                                                                                                                                                                                 |
| Estimated based on sources: <a href="https://worldmap.harvard.edu/maps/19173">https://worldmap.harvard.edu/maps/19173</a> ,<br><a href="https://www.ncbi.nlm.nih.gov/pmc/articles/PMC6207062/">https://www.ncbi.nlm.nih.gov/pmc/articles/PMC6207062/</a> , <a href="https://de.wikipedia.org/wiki/Datei:Subtropical.png">https://de.wikipedia.org/wiki/Datei:Subtropical.png</a><br><a href="http://koeppen-geiger.vu-wien.ac.at/pics/Geiger_1954_Map.jpg">http://koeppen-geiger.vu-wien.ac.at/pics/Geiger_1954_Map.jpg</a> |
| estimated based on previously defined data*                                                                                                                                                                                                                                                                                                                                                                                                                                                                                 |
| <a href="https://de.wikipedia.org/wiki/Pakistan">https://de.wikipedia.org/wiki/Pakistan</a>                                                                                                                                                                                                                                                                                                                                                                                                                                 |
| <a href="https://de.wikipedia.org/wiki/Paraguay">https://de.wikipedia.org/wiki/Paraguay</a>                                                                                                                                                                                                                                                                                                                                                                                                                                 |
| <a href="https://en.wikipedia.org/wiki/Arabian_Peninsula">https://en.wikipedia.org/wiki/Arabian_Peninsula</a>                                                                                                                                                                                                                                                                                                                                                                                                               |
| <a href="https://en.wikipedia.org/wiki/Malay_Peninsula">https://en.wikipedia.org/wiki/Malay_Peninsula</a>                                                                                                                                                                                                                                                                                                                                                                                                                   |
| <a href="https://de.wikipedia.org/wiki/Kleine_Antillen">https://de.wikipedia.org/wiki/Kleine_Antillen</a>                                                                                                                                                                                                                                                                                                                                                                                                                   |
| <a href="https://en.wikipedia.org/wiki/Peru">https://en.wikipedia.org/wiki/Peru</a>                                                                                                                                                                                                                                                                                                                                                                                                                                         |
| <a href="https://de.wikipedia.org/wiki/Polynesien">https://de.wikipedia.org/wiki/Polynesien</a>                                                                                                                                                                                                                                                                                                                                                                                                                             |
| <a href="https://en.wikipedia.org/wiki/Poland">https://en.wikipedia.org/wiki/Poland</a>                                                                                                                                                                                                                                                                                                                                                                                                                                     |
| <a href="https://de.wikipedia.org/wiki/Prinz-Edward-Inseln">https://de.wikipedia.org/wiki/Prinz-Edward-Inseln</a>                                                                                                                                                                                                                                                                                                                                                                                                           |
| <a href="https://de.wikipedia.org/wiki/Reunion">https://de.wikipedia.org/wiki/Reunion</a>                                                                                                                                                                                                                                                                                                                                                                                                                                   |
| <a href="https://de.wikipedia.org/wiki/Ruanda">https://de.wikipedia.org/wiki/Ruanda</a>                                                                                                                                                                                                                                                                                                                                                                                                                                     |
| <a href="https://es.wikipedia.org/wiki/Sahara_Occidental">https://es.wikipedia.org/wiki/Sahara_Occidental</a>                                                                                                                                                                                                                                                                                                                                                                                                               |
| <a href="https://en.wikipedia.org/wiki/Samoa">https://en.wikipedia.org/wiki/Samoa</a>                                                                                                                                                                                                                                                                                                                                                                                                                                       |
| <a href="https://de.wikipedia.org/wiki/St._Helena_(Insel)">https://de.wikipedia.org/wiki/St._Helena_(Insel)</a>                                                                                                                                                                                                                                                                                                                                                                                                             |

|                                                                                                                                                                                                                                                                                                                                                                                                                                                                                                                             |
|-----------------------------------------------------------------------------------------------------------------------------------------------------------------------------------------------------------------------------------------------------------------------------------------------------------------------------------------------------------------------------------------------------------------------------------------------------------------------------------------------------------------------------|
| <a href="https://en.wikipedia.org/wiki/Senegal">https://en.wikipedia.org/wiki/Senegal</a>                                                                                                                                                                                                                                                                                                                                                                                                                                   |
| <a href="https://en.wikipedia.org/wiki/Seychelles">https://en.wikipedia.org/wiki/Seychelles</a>                                                                                                                                                                                                                                                                                                                                                                                                                             |
| <a href="https://en.wikipedia.org/wiki/South_Shetland_Islands">https://en.wikipedia.org/wiki/South_Shetland_Islands</a>                                                                                                                                                                                                                                                                                                                                                                                                     |
| <a href="https://de.wikipedia.org/wiki/Sizilien">https://de.wikipedia.org/wiki/Sizilien</a>                                                                                                                                                                                                                                                                                                                                                                                                                                 |
| <a href="https://de.wikipedia.org/wiki/Sikkim">https://de.wikipedia.org/wiki/Sikkim</a>                                                                                                                                                                                                                                                                                                                                                                                                                                     |
| <a href="https://en.wikipedia.org/wiki/Somalia">https://en.wikipedia.org/wiki/Somalia</a>                                                                                                                                                                                                                                                                                                                                                                                                                                   |
| Estimated based on sources: <a href="https://worldmap.harvard.edu/maps/19173">https://worldmap.harvard.edu/maps/19173</a> ,<br><a href="https://www.ncbi.nlm.nih.gov/pmc/articles/PMC6207062/">https://www.ncbi.nlm.nih.gov/pmc/articles/PMC6207062/</a> , <a href="https://de.wikipedia.org/wiki/Datei:Subtropical.png">https://de.wikipedia.org/wiki/Datei:Subtropical.png</a><br><a href="http://koeppen-geiger.vu-wien.ac.at/pics/Geiger_1954_Map.jpg">http://koeppen-geiger.vu-wien.ac.at/pics/Geiger_1954_Map.jpg</a> |
| <a href="https://en.wikipedia.org/wiki/South_Africa">https://en.wikipedia.org/wiki/South_Africa</a>                                                                                                                                                                                                                                                                                                                                                                                                                         |
| <a href="https://de.wikipedia.org/wiki/Südamerika">https://de.wikipedia.org/wiki/Südamerika</a>                                                                                                                                                                                                                                                                                                                                                                                                                             |
| <a href="https://en.wikipedia.org/wiki/Switzerland">https://en.wikipedia.org/wiki/Switzerland</a>                                                                                                                                                                                                                                                                                                                                                                                                                           |
| <a href="https://de.wikipedia.org/wiki/Sumatra">https://de.wikipedia.org/wiki/Sumatra</a>                                                                                                                                                                                                                                                                                                                                                                                                                                   |
| <a href="https://de.wikipedia.org/wiki/Sibirien_(Föderationskreis)">https://de.wikipedia.org/wiki/Sibirien_(Föderationskreis)</a>                                                                                                                                                                                                                                                                                                                                                                                           |
| <a href="https://es.wikipedia.org/wiki/Sureste_de_Estados_Unidos">https://es.wikipedia.org/wiki/Sureste_de_Estados_Unidos</a>                                                                                                                                                                                                                                                                                                                                                                                               |
| <a href="https://de.wikipedia.org/wiki/Sibirien_(Föderationskreis)">https://de.wikipedia.org/wiki/Sibirien_(Föderationskreis)</a>                                                                                                                                                                                                                                                                                                                                                                                           |
| <a href="https://en.wikipedia.org/wiki/Tahiti">https://en.wikipedia.org/wiki/Tahiti</a>                                                                                                                                                                                                                                                                                                                                                                                                                                     |
| <a href="https://de.wikipedia.org/wiki/Thailand">https://de.wikipedia.org/wiki/Thailand</a>                                                                                                                                                                                                                                                                                                                                                                                                                                 |
| <a href="https://en.wikipedia.org/wiki/Taiwan">https://en.wikipedia.org/wiki/Taiwan</a>                                                                                                                                                                                                                                                                                                                                                                                                                                     |
| <a href="https://de.wikipedia.org/wiki/Tansania">https://de.wikipedia.org/wiki/Tansania</a>                                                                                                                                                                                                                                                                                                                                                                                                                                 |
| <a href="https://de.wikipedia.org/wiki/Texas">https://de.wikipedia.org/wiki/Texas</a>                                                                                                                                                                                                                                                                                                                                                                                                                                       |
| <a href="https://en.wikipedia.org/wiki/Tonga">https://en.wikipedia.org/wiki/Tonga</a>                                                                                                                                                                                                                                                                                                                                                                                                                                       |
| <a href="https://de.wikipedia.org/wiki/Tripura">https://de.wikipedia.org/wiki/Tripura</a>                                                                                                                                                                                                                                                                                                                                                                                                                                   |
| <a href="https://de.wikipedia.org/wiki/Tristan_da_Cunha">https://de.wikipedia.org/wiki/Tristan_da_Cunha</a>                                                                                                                                                                                                                                                                                                                                                                                                                 |
| <a href="https://es.wikipedia.org/wiki/Túnez">https://es.wikipedia.org/wiki/Túnez</a>                                                                                                                                                                                                                                                                                                                                                                                                                                       |
| <a href="https://de.wikipedia.org/wiki/Vereinigte_Staaten">https://de.wikipedia.org/wiki/Vereinigte_Staaten</a>                                                                                                                                                                                                                                                                                                                                                                                                             |
| <a href="https://en.wikipedia.org/wiki/Central_Time_Zone">https://en.wikipedia.org/wiki/Central_Time_Zone</a>                                                                                                                                                                                                                                                                                                                                                                                                               |
| <a href="https://en.wikipedia.org/wiki/Subtropics#/media/File:World_map_indicating_tropics_and_subtropics.png">https://en.wikipedia.org/wiki/Subtropics#/media/File:World_map_indicating_tropics_and_subtropics.png</a>                                                                                                                                                                                                                                                                                                     |
| <a href="https://en.wikipedia.org/wiki/Geography_of_Michigan">https://en.wikipedia.org/wiki/Geography_of_Michigan</a>                                                                                                                                                                                                                                                                                                                                                                                                       |
| <a href="https://de.wikipedia.org/wiki/Uruguay">https://de.wikipedia.org/wiki/Uruguay</a>                                                                                                                                                                                                                                                                                                                                                                                                                                   |
| <a href="https://de.wikipedia.org/wiki/Uttar_Pradesh">https://de.wikipedia.org/wiki/Uttar_Pradesh</a>                                                                                                                                                                                                                                                                                                                                                                                                                       |
| <a href="https://de.wikipedia.org/wiki/Venezuela">https://de.wikipedia.org/wiki/Venezuela</a>                                                                                                                                                                                                                                                                                                                                                                                                                               |
| <a href="https://en.wikipedia.org/wiki/Vietnam">https://en.wikipedia.org/wiki/Vietnam</a>                                                                                                                                                                                                                                                                                                                                                                                                                                   |

<https://de.wikipedia.org/wiki/Virginia>

<https://en.wikipedia.org/wiki/Zambia>

mentioned regions, e.g. Paleártica oriental as one-third of Paleártica

31, 213–217

s, Oribatida) del mundo (excepto fósiles) (17a actualización): 537 pp. [http://bba.bioucm.es/cont/docs/RO\\_1.pdf](http://bba.bioucm.es/cont/docs/RO_1.pdf)

alpine biomes. *Ecography* 43, 779–788
