# Supplementary material for: “Jack‐of‐all‐trades” is parthenogenetic
Source: PubMed Central journal article supplement (PMC9219104; doi:10.1002/ece3.9036), 2022-06-23
Supplement: ECE3-12-e9036-s002.pdf [file ECE3-12-e9036-s002.pdf]

**Appendix; table 2:** Species names, taxonomic affiliation (family), reproductive mode, reason for the assignment of the reproductive mode with reference, distribution. Area data are sums of the respective regions as reported in the Appendix, Table 1. Full references are given below the table.

| Species names after Subías (2022)                                                          | Family            | Reproductive mode | Reason for assignment of the reproductive mode |
|--------------------------------------------------------------------------------------------|-------------------|-------------------|------------------------------------------------|
| <i>Achipteria coleoprata</i> (Linnaeus, 1758)                                              | Achipteriidae     | sexual            | sex ratio                                      |
| <i>Achipteria elegans</i> Schweizer, 1956                                                  | Achipteriidae     | sexual            | inference                                      |
| <i>Achipteria nitens</i> (Nicolet, 1855)                                                   | Achipteriidae     | sexual            | sex ratio                                      |
| <i>Achipteria sellnicki</i> Hammen, 1952                                                   | Achipteriidae     | sexual            | inference                                      |
| <i>Acroalumna longipluma</i> (Berlese, 1904)                                               | Galumnidae        | sexual            | inference                                      |
| <i>Acrotritia ardua</i> Koch, 1841                                                         | Euphthiracaridae  | thelytokous       | sex ratio, rearing                             |
| <i>Acrotritia duplicata</i> (Grandjean, 1953)                                              | Euphthiracaridae  | thelytokous       | rearing                                        |
| <i>Acrotritia hyeroglyphica</i> (Berlese, 1916)                                            | Euphthiracaridae  | sexual            | inference                                      |
| <i>Adoristes ovatus</i> (Koch, 1839)                                                       | Liacaridae        | sexual            | sex ratio                                      |
| <i>Adrodamaeus femoratus</i> (Koch, 1839)                                                  | Gymnodamaeidae    | sexual            | inference                                      |
| <i>Adrodamaeus siculus</i> (Berlese, 1910)                                                 | Gymnodamaeidae    | sexual            | inference                                      |
| <i>Adrodamaeus vietnamicus</i> (Ermilov & Anichkin, 2011)                                  | Gymnodamaeidae    | sexual            | inference                                      |
| <i>Afronothrus incisivus</i> Wallwork, 1961                                                | Trhypochthoniidae | thelytokous       | sex ratio, rearing                             |
| <i>Allogalumna indonesiensis</i> Ermilov, Sandmann, Klarner, Widyastuti & Scheu, 2015      | Galumnidae        | sexual            | inference                                      |
| <i>Allogalumna monodactyla</i> Ermilov & Anichkin, 2014                                    | Galumnidae        | sexual            | inference                                      |
| <i>Allogalumna paranovazealandica</i> Ermilov, Sandmann, Klarner, Widyastuti & Scheu, 2015 | Galumnidae        | sexual            | inference                                      |
| <i>Allonothrus russeolus</i> Wallwork, 1960                                                | Trhypochthoniidae | thelytokous       | sex ratio                                      |
| <i>Allosuctobelba grandis</i> (Paoli, 1908)                                                | Suctobelbidae     | thelytokous       | inference                                      |
| <i>Allosuctobelba obtusa</i> (Jacot, 1938)                                                 | Suctobelbidae     | thelytokous       | sex ratio                                      |
| <i>Allozetes pusillus</i> (Berlese, 1913)                                                  | Ceratozetidae     | sexual            | inference                                      |
| <i>Amazoppia tricuspida</i> Balogh & Mahunka, 1969                                         | Ceratoppiidae     | sexual            | inference                                      |
| <i>Amerobelba decedens</i> Berlese, 1908                                                   | Amerobelbidae     | sexual            | inference                                      |
| <i>Amerus polonicus</i> Kulczynski, 1902                                                   | Ameridae          | sexual            | inference                                      |
| <i>Amerus troisi</i> (Berlese, 1883)                                                       | Ameridae          | sexual            | inference                                      |
| <i>Ampullobates ecuadoriensis</i> Ermilov, Sandmann, Marian & Maraun, 2013                 | Hermannelliidae   | sexual            | inference                                      |
| <i>Aphelacarus acarinus</i> (Berlese, 1910)                                                | Palaeacaridae     | sexual            | inference                                      |
| <i>Apoplophora cristata</i> Mahunka, 1991                                                  | Mesoplophoridae   | sexual            | inference                                      |
| <i>Archegozetes longisetosus</i> Aoki, 1965                                                | Trhypochthoniidae | thelytokous       | sex ratio, rearing                             |

|                                                             |                   |             |           |
|-------------------------------------------------------------|-------------------|-------------|-----------|
| <i>Archoplophora rostralis</i> (Willmann, 1930)             | Mesoplophoridae   | thelytokous | sex ratio |
| <i>Arcoppia dechambrierorum</i> (Mahunka, 1983)             | Oppiidae          | sexual      | inference |
| <i>Arcoppia hammerae</i> Rodríguez & Subías, 1984           | Oppiidae          | sexual      | inference |
| <i>Arcoppia tripartita</i> (Hammer, 1961)                   | Oppiidae          | sexual      | inference |
| <i>Arcoppia vittata</i> Hammer, 1979                        | Oppiidae          | sexual      | inference |
| <i>Atropacarus phyllophorus</i> (Berlese, 1904)             | Phthiracaridae    | sexual      | inference |
| <i>Atropacarus striculus</i> (Koch, 1835)                   | Phthiracaridae    | thelytokous | sex ratio |
| <i>Austrocarabodes arrogans</i> Pérez-Íñigo, 1967           | Carabodidae       | sexual      | inference |
| <i>Austrocarabodes ensifer</i> (Sellnick, 1931)             | Carabodidae       | sexual      | inference |
| <i>Autogneta dalecarlica</i> Forsslund, 1947                | Autognetidae      | sexual      | inference |
| <i>Autogneta longilamellata</i> (Michael, 1885)             | Autognetidae      | sexual      | inference |
| <i>Autogneta traegardhi</i> Forsslund, 1947                 | Autognetidae      | sexual      | inference |
| <i>Banksinoma lanceolata</i> (Michael, 1885)                | Thyrisomidae      | sexual      | sex ratio |
| <i>Basilobelba parmata</i> Okayama, 1980                    | Basilobelbidae    | sexual      | inference |
| <i>Basilobelba retiaria</i> (Warburton, 1912)               | Basilobelbidae    | sexual      | inference |
| <i>Beckiella capitulum</i> Balogh & Mahunka, 1978           | Dampfiellidae     | sexual      | inference |
| <i>Belba bartoši</i> Winkler, 1955                          | Belbidae          | sexual      | inference |
| <i>Belba meridionalis</i> Bulanova-Zachvatkina, 1962        | Belbidae          | sexual      | inference |
| <i>Berlesezetes brazilozetoides</i> Balogh & Mahunka, 1981  | Microzetidae      | sexual      | inference |
| <i>Berlesezetes ornatissimus</i> (Berlese, 1913)            | Microzetidae      | sexual      | inference |
| <i>Berniniella bicarinata</i> (Paoli, 1908)                 | Oppiidae          | sexual      | inference |
| <i>Berniniella conjuncta</i> (Strenzke, 1951)               | Oppiidae          | sexual      | sex ratio |
| <i>Berniniella sigma</i> (Strenzke, 1951)                   | Oppiidae          | sexual      | sex ratio |
| <i>Bipassalozetes striatus</i> (Mihelčič, 1955)             | Passalozetidae    | sexual      | inference |
| <i>Brachioppia cuscensis</i> Hammer, 1961                   | Oppiidae          | sexual      | inference |
| <i>Brachioppia deliciosa</i> Hammer, 1961                   | Oppiidae          | sexual      | inference |
| <i>Brachychthonius berlesei</i> Willmann, 1928              | Brachychthoniidae | thelytokous | rearing   |
| <i>Brachychthonius hirtus</i> Moritz, 1976                  | Brachychthoniidae | thelytokous | inference |
| <i>Brachychthonius impressus</i> Moritz, 1976               | Brachychthoniidae | thelytokous | sex ratio |
| <i>Brachychthonius pius</i> Moritz, 1976                    | Brachychthoniidae | thelytokous | inference |
| <i>Brassiella neonominata</i> Subías, 2004                  | Caloppiidae       | sexual      | inference |
| <i>Bursoplophora insularis</i> Kahwash, Subías & Ruiz, 1989 | Protoplophoridae  | sexual      | inference |

|                                                         |                  |             |                    |
|---------------------------------------------------------|------------------|-------------|--------------------|
| <i>Bursoplophora meridionalis</i> Bernini, 1983         | Protoplophoridae | sexual      | inference          |
| <i>Caleremaeus monilipes</i> (Michael, 1882)            | Caleremaeidae    | sexual      | inference          |
| <i>Camisia biurus</i> (Koch, 1839)                      | Crotoniidae      | thelytokous | inference          |
| <i>Camisia hamulifera</i> Hammer, 1961                  | Crotoniidae      | thelytokous | inference          |
| <i>Camisia horrida</i> (Hermann, 1804)                  | Crotoniidae      | thelytokous | sex ratio          |
| <i>Camisia invenusta</i> (Michael, 1888)                | Crotoniidae      | thelytokous | sex ratio          |
| <i>Camisia khencensis</i> Hammer, 1961                  | Crotoniidae      | thelytokous | inference          |
| <i>Camisia lapponica</i> (Trägårdh, 1910)               | Crotoniidae      | thelytokous | inference          |
| <i>Camisia segnis</i> (Hermann, 1804)                   | Crotoniidae      | thelytokous | sex ratio, rearing |
| <i>Camisia solhoeyi</i> Colloff, 1993                   | Crotoniidae      | thelytokous | inference          |
| <i>Camisia spinifer</i> (Koch, 1836)                    | Crotoniidae      | thelytokous | sex ratio, rearing |
| <i>Campachipteria fanzagoi</i> (Jacot, 1929)            | Achipteriidae    | sexual      | inference          |
| <i>Campachipteria perproxima</i> (Sellnick, 1931)       | Achipteriidae    | sexual      | inference          |
| <i>Campachipteria petiti</i> (Travé, 1960)              | Achipteriidae    | sexual      | inference          |
| <i>Campachipteria weigmanni</i> (Pérez-Íñigo, 1987)     | Achipteriidae    | sexual      | inference          |
| <i>Carabodes areolatus</i> Berlese, 1916                | Carabodidae      | sexual      | inference          |
| <i>Carabodes coriaceus</i> Koch, 1835                   | Carabodidae      | sexual      | inference          |
| <i>Carabodes femoralis</i> (Nicolet, 1855)              | Carabodidae      | sexual      | inference          |
| <i>Carabodes labyrinthicus</i> (Michael, 1879)          | Carabodidae      | sexual      | sex ratio          |
| <i>Carabodes marginatus</i> (Michael, 1884)             | Carabodidae      | sexual      | inference          |
| <i>Carabodes ornatus</i> Štorkán, 1925                  | Carabodidae      | sexual      | sex ratio          |
| <i>Carabodes reticulatus</i> Berlese, 1913              | Carabodidae      | sexual      | inference          |
| <i>Carabodes rugosior</i> Berlese, 1916                 | Carabodidae      | sexual      | inference          |
| <i>Carabodes samoensis</i> J. & P. Balogh, 1986         | Carabodidae      | sexual      | inference          |
| <i>Carabodes subarcticus</i> Trägårdh, 1902             | Carabodidae      | sexual      | inference          |
| <i>Carabodes willmanni</i> Bernini, 1975                | Carabodidae      | sexual      | inference          |
| <i>Caucasiozetes frankeae</i> Ermilov & Anichkin, 2011  | Microzetidae     | sexual      | inference          |
| <i>Cavaecarabodes orientalis</i> (Mahunka, 1987)        | Carabodidae      | sexual      | inference          |
| <i>Cavernocephus monstruosus</i> Balogh & Mahunka, 1969 | Dampfiellidae    | sexual      | inference          |
| <i>Cepheus cepheiformis</i> (Nicolet, 1855)             | Cepheidae        | sexual      | inference          |
| <i>Cepheus dentatus</i> (Michael, 1888)                 | Cepheidae        | sexual      | inference          |
| <i>Cepheus latus</i> Koch, 1835                         | Cepheidae        | sexual      | inference          |
| <i>Ceratoppia bipilis</i> (Hermann, 1804)               | Ceratoppiidae    | sexual      | inference          |

|                                                               |                  |             |           |
|---------------------------------------------------------------|------------------|-------------|-----------|
| <i>Ceratoppia quadridentata</i> (Haller, 1882)                | Ceratoppiidae    | sexual      | inference |
| <i>Ceratoppia sexpilosa</i> Willmann, 1938                    | Ceratoppiidae    | sexual      | inference |
| <i>Ceratoppia sphaerica</i> (C.L. Koch, 1879)                 | Ceratoppiidae    | sexual      | inference |
| <i>Ceratorchestes globosus</i> Balogh & Mahunka, 1969         | Ceratoppiidae    | sexual      | inference |
| <i>Ceratozetes cuspidatus</i> Jacot, 1939                     | Ceratozetidae    | thelytokous | sex ratio |
| <i>Ceratozetes gracilis</i> (Michael, 1884)                   | Ceratozetidae    | sexual      | sex ratio |
| <i>Ceratozetes mediocris</i> Berlese, 1908                    | Ceratozetidae    | sexual      | inference |
| <i>Ceratozetes pacificus</i> Behan-Pelletier, 1984            | Ceratozetidae    | sexual      | inference |
| <i>Ceratozetes peritus</i> Grandjean, 1951                    | Ceratozetidae    | sexual      | sex ratio |
| <i>Chamobates birulai</i> (Kulczynski, 1902)                  | Chamobatidae     | sexual      | inference |
| <i>Chamobates cuspidatus</i> (Michael, 1884)                  | Chamobatidae     | sexual      | sex ratio |
| <i>Chamobates pusillus</i> (Berlese, 1895)                    | Chamobatidae     | sexual      | inference |
| <i>Chamobates subglobulus</i> (Oudemans, 1900)                | Chamobatidae     | sexual      | sex ratio |
| <i>Chamobates voigtsii</i> (Oudemans, 1902)                   | Chamobatidae     | sexual      | inference |
| <i>Chistyakovella insolita</i> Ermilov, Aoki & Anichkin, 2013 | Carabodidae      | sexual      | inference |
| <i>Coartobelba loksai</i> (Balogh & Mahunka, 1981)            | Suctobelbidae    | thelytokous | inference |
| <i>Cosmochthonius lanatus</i> (Michael, 1885)                 | Cosmochthoniidae | sexual      | inference |
| <i>Cosmochthonius plumatus</i> Berlese, 1910                  | Cosmochthoniidae | sexual      | inference |
| <i>Cosmohermannia robusta</i> (Aoki, 1994)                    | Nanhermanniidae  | thelytokous | inference |
| <i>Cosmozetes vermiculatus</i> (Balogh & Mahunka, 1980)       | Microzetidae     | sexual      | inference |
| <i>Cryptacarus promecus</i> Grandjean, 1950                   | Lohmanniidae     | thelytokous | sex ratio |
| <i>Cryptoplophora abscondita</i> Grandjean, 1932              | Protoplophoridae | sexual      | inference |
| <i>Cryptoppia mahunkai</i> (Wang & Li, 1997)                  | Oppiidae         | sexual      | inference |
| <i>Ctenacarus araneola</i> (Grandjean, 1932)                  | Ctenacaridae     | sexual      | inference |
| <i>Cultroribula berolina</i> Weigmann, 2006                   | Astegistidae     | thelytokous | inference |
| <i>Cultroribula bicultrata</i> (Berlese, 1905)                | Astegistidae     | thelytokous | sex ratio |
| <i>Cultroribula divergens</i> Jacot, 1939                     | Astegistidae     | thelytokous | sex ratio |
| <i>Cultroribula juncta</i> (Michael, 1885)                    | Astegistidae     | thelytokous | inference |
| <i>Cultroribula lata</i> Aoki, 1961                           | Astegistidae     | thelytokous | inference |
| <i>Cultroribula zicsii</i> Balogh & Mahunka, 1981             | Astegistidae     | thelytokous | inference |
| <i>Cycloppia restata</i> (Aoki, 1963)                         | Oppiidae         | sexual      | inference |
| <i>Cymbaeremaeus cymba</i> (Nicolet, 1855)                    | Cymbaeremaeidae  | sexual      | inference |
| <i>Cyrthermannia florens</i> Balogh & Mahunka, 1980           | Nanhermanniidae  | thelytokous | inference |

|                                                                  |                   |             |           |
|------------------------------------------------------------------|-------------------|-------------|-----------|
| <i>Cyrthermannia tuberculata</i> Balogh, 1958                    | Nanhermanniidae   | thelytokous | inference |
| <i>Cyrthermannia vicinicornuta</i> Aoki, 1965                    | Nanhermanniidae   | thelytokous | inference |
| <i>Damaeobelba minutissima</i> (Sellnick, 1929)                  | Damaeidae         | thelytokous | sex ratio |
| <i>Damaeolus ornatissimus</i> Csiszár, 1962                      | Damaeolidae       | sexual      | inference |
| <i>Damaeus angustipes</i> (Banks, 1905)                          | Damaeidae         | sexual      | inference |
| <i>Damaeus bituberculatus</i> (Kulczynski, 1902)                 | Damaeidae         | sexual      | inference |
| <i>Damaeus boreus</i> Bulanova-Zachvatkina, 1957                 | Damaeidae         | sexual      | inference |
| <i>Damaeus clavipes</i> (Hermann, 1804)                          | Damaeidae         | sexual      | inference |
| <i>Damaeus fagei</i> Bulanova-Zachvatkina, 1957                  | Damaeidae         | sexual      | inference |
| <i>Damaeus flagellatus</i> Wang, 1994                            | Damaeidae         | sexual      | inference |
| <i>Damaeus flagelloides</i> (Norton, 1979)                       | Damaeidae         | sexual      | inference |
| <i>Damaeus onustus</i> Koch, 1841                                | Damaeidae         | sexual      | sex ratio |
| <i>Damaeus riparius</i> Nicolet, 1855                            | Damaeidae         | sexual      | sex ratio |
| <i>Damaeus tecticola</i> Michael, 1888                           | Damaeidae         | sexual      | inference |
| <i>Dendrohermannia monstrosa</i> (Aoki, 1977)                    | Nanhermanniidae   | thelytokous | inference |
| <i>Diapterobates humeralis</i> (Hermann, 1804)                   | Humerobatidae     | sexual      | inference |
| <i>Diapterobates notatus</i> (Thorell, 1871)                     | Humerobatidae     | sexual      | inference |
| <i>Discoppia cylindrica</i> (Pérez-Íñigo, 1965)                  | Oppiidae          | sexual      | inference |
| <i>Dissorhina ornata</i> (Oudemans, 1900)                        | Oppiidae          | sexual      | sex ratio |
| <i>Dolicheremaeus aokii</i> (Balogh & Mahunka, 1967)             | Tetracondylidae   | sexual      | inference |
| <i>Dolicheremaeus bugiamapensis</i> Ermilov, Anichkin & Wu, 2012 | Tetracondylidae   | sexual      | inference |
| <i>Dolicheremaeus contactus</i> Ermilov & Anichkin, 2013         | Tetracondylidae   | sexual      | inference |
| <i>Dolicheremaeus donacunarensis</i> Ermilov & Anichkin, 2014    | Tetracondylidae   | sexual      | inference |
| <i>Dolicheremaeus dorni</i> (Balogh, 1937)                       | Tetracondylidae   | sexual      | inference |
| <i>Dolicheremaeus dwalteri</i> Ermilov & Anichkin, 2014          | Tetracondylidae   | sexual      | inference |
| <i>Dolicheremaeus sumatranus</i> Mahunka, 1989                   | Tetracondylidae   | sexual      | inference |
| <i>Dolicheremaeus variolatus</i> Mahunka, 1989                   | Tetracondylidae   | sexual      | inference |
| <i>Dolicheremaeus variolobatus</i> Hammer, 1981                  | Tetracondylidae   | sexual      | inference |
| <i>Edwardzetes armatus</i> (Hammer, 1958)                        | Ceratozetidae     | sexual      | inference |
| <i>Edwardzetes edwardsi</i> (Nicolet, 1855)                      | Ceratozetidae     | sexual      | inference |
| <i>Eobrachychthonius latior</i> (Berlese, 1910)                  | Brachychthoniidae | thelytokous | inference |
| <i>Eohypochthonius salicifolius</i> Hammer, 1979                 | Hypochthoniidae   | thelytokous | inference |
| <i>Epieremulus granulatus</i> (Balogh & Mahunka, 1979)           | Caleremaeidae     | sexual      | inference |

|                                                           |                  |             |           |
|-----------------------------------------------------------|------------------|-------------|-----------|
| <i>Epiremulus longiseta</i> (P. Balogh, 1988)             | Caleremaeidae    | sexual      | inference |
| <i>Epilohmannia crassisetosa</i> Ermilov & Anichkin, 2012 | Epilohmanniidae  | sexual      | inference |
| <i>Epilohmannia cylindrica</i> (Berlese, 1904)            | Epilohmanniidae  | thelytokous | sex ratio |
| <i>Epilohmannia minuta</i> Berlese, 1920                  | Epilohmanniidae  | thelytokous | inference |
| <i>Epilohmannoides wallworki</i> Hammer, 1981             | Epilohmanniidae  | sexual      | inference |
| <i>Eremaeus granulatus</i> Mihelčič, 1955                 | Eremaeidae       | sexual      | inference |
| <i>Eremaeus hepaticus</i> Koch, 1835                      | Eremaeidae       | sexual      | inference |
| <i>Eremella induta</i> Berlese, 1913                      | Eremellidae      | sexual      | inference |
| <i>Eremobelba bellicosa</i> Balogh & Mahunka, 1967        | Ctenobelbidae    | sexual      | inference |
| <i>Eremobelba breviseta</i> Balogh, 1968                  | Ctenobelbidae    | sexual      | inference |
| <i>Eremobelba comteae</i> Mahunka, 1988                   | Ctenobelbidae    | sexual      | inference |
| <i>Eremobelba gracilior</i> Berlese, 1908                 | Ctenobelbidae    | sexual      | sex ratio |
| <i>Eremobelba pectinigera</i> Berlese, 1908               | Ctenobelbidae    | sexual      | inference |
| <i>Eremulus baliensis</i> Hammer, 1982                    | Caleremaeidae    | sexual      | inference |
| <i>Eremulus densus</i> Hammer, 1979                       | Caleremaeidae    | sexual      | inference |
| <i>Eremulus nigrisetosus</i> Hammer, 1958                 | Caleremaeidae    | sexual      | inference |
| <i>Eueremaeus silvestris</i> (Forsslund, 1956)            | Eremaeidae       | sexual      | inference |
| <i>Eulohmannia ribagai</i> (Berlese, 1910)                | Eulohmanniidae   | thelytokous | sex ratio |
| <i>Eupelops acromios</i> (Hermann, 1804)                  | Phenopelopidae   | sexual      | inference |
| <i>Eupelops claviger</i> (Berlese, 1916)                  | Phenopelopidae   | sexual      | inference |
| <i>Eupelops major</i> (Hull, 1914)                        | Phenopelopidae   | sexual      | inference |
| <i>Eupelops occultus</i> (Koch, 1835)                     | Phenopelopidae   | sexual      | sex ratio |
| <i>Eupelops plicatus</i> (Koch, 1835)                     | Phenopelopidae   | sexual      | sex ratio |
| <i>Eupelops subuliger</i> (Berlese, 1916)                 | Phenopelopidae   | sexual      | inference |
| <i>Eupelops torulosus</i> (Koch, 1839)                    | Phenopelopidae   | sexual      | inference |
| <i>Euphthiracarus cribrarius</i> (Berlese, 1904)          | Euphthiracaridae | sexual      | inference |
| <i>Eupterotegaeus dentatus</i> Sitnikova, 1979            | Cepheidae        | sexual      | inference |
| <i>Eurostocephus aquilinus</i> Aoki, 1965                 | Otocephidae      | sexual      | inference |
| <i>Euzetes globulus</i> (Nicolet, 1855)                   | Ceratozetidae    | sexual      | inference |
| <i>Fuscozetes fuscipes</i> (Koch, 1844)                   | Ceratozetidae    | sexual      | inference |
| <i>Fuscozetes setosus</i> (Koch, 1839)                    | Ceratozetidae    | sexual      | sex ratio |
| <i>Galumna alata</i> (Hermann, 1804)                      | Galumnidae       | sexual      | inference |

|                                                                                      |                   |             |           |
|--------------------------------------------------------------------------------------|-------------------|-------------|-----------|
| <i>Galumna areticulata</i> Ermilov, Sandmann, Klarner, Widyastuti & Scheu, 2015      | Galumnidae        | sexual      | inference |
| <i>Galumna bidentatirostris</i> Ermilov, Sandmann, Klarner, Widyastuti & Scheu, 2015 | Galumnidae        | sexual      | inference |
| <i>Galumna calva</i> Starý, 1997                                                     | Galumnidae        | sexual      | inference |
| <i>Galumna corpuzrarosae</i> Ermilov, Sandmann, Klarner, Widyastuti & Scheu, 2015    | Galumnidae        | sexual      | inference |
| <i>Galumna dimorpha</i> Krivolutskaia, 1952                                          | Galumnidae        | sexual      | inference |
| <i>Galumna dispar</i> Willmann, 1932                                                 | Galumnidae        | sexual      | inference |
| <i>Galumna dongnaiensis</i> Ermilov & Anichkin, 2013                                 | Galumnidae        | sexual      | inference |
| <i>Galumna flabellifera</i> Hammer, 1958                                             | Galumnidae        | sexual      | inference |
| <i>Galumna indonesica</i> Ermilov, Sandmann, Klarner, Widyastuti & Scheu, 2015       | Galumnidae        | sexual      | inference |
| <i>Galumna ithacensis</i> (Jacot, 1929)                                              | Galumnidae        | sexual      | sex ratio |
| <i>Galumna khoii</i> Mahunka, 1989                                                   | Galumnidae        | sexual      | inference |
| <i>Galumna lanceata</i> (Oudemans, 1900)                                             | Galumnidae        | sexual      | sex ratio |
| <i>Galumna levisensilla</i> Ermilov & Anichkin, 2010                                 | Galumnidae        | sexual      | inference |
| <i>Galumna mikoi</i> Ermilov, Sandmann, Klarner, Widyastuti & Scheu, 2015            | Galumnidae        | sexual      | inference |
| <i>Galumna miniporosa</i> Ermilov, Starý, Sandmann & Maraun, 2013                    | Galumnidae        | sexual      | inference |
| <i>Galumna paracalcicola</i> Ermilov & Anichkin, 2014                                | Galumnidae        | sexual      | inference |
| <i>Galumna parakazakhstan</i> i Ermilov & Anichkin, 2014                             | Galumnidae        | sexual      | inference |
| <i>Galumna pseudokhoii</i> Ermilov & Anichkin, 2011                                  | Galumnidae        | sexual      | inference |
| <i>Galumna sabahna</i> Mahunka, 1995                                                 | Galumnidae        | sexual      | inference |
| <i>Galumna sumatrensis</i> Ermilov, Sandmann, Klarner, Widyastuti & Scheu, 2015      | Galumnidae        | sexual      | inference |
| <i>Galumnella geographica</i> Mahunka, 1995                                          | Galumnellidae     | sexual      | inference |
| <i>Galumnella microporosa</i> Ermilov & Anichkin, 2011                               | Galumnellidae     | sexual      | inference |
| <i>Galumnopsis reducta</i> (Mahunka, 1995)                                           | Galumnellidae     | sexual      | inference |
| <i>Gehypochthonius rhadamanthus</i> Jacot, 1936                                      | Gehypochthoniidae | thelytokous | sex ratio |
| <i>Gigantoppia zryanini</i> Ermilov & Anichkin, 2011                                 | Granuloppiidae    | sexual      | inference |
| <i>Gittella flagellata</i> (Mahunka, 1983)                                           | Oppiidae          | sexual      | inference |
| <i>Gittella variabilis</i> Ermilov, Sandmann, Marian & Maraun, 2013                  | Oppiidae          | sexual      | inference |
| <i>Globogalumna biporosa</i> Ermilov & Anichkin, 2012                                | Galumnidae        | sexual      | inference |
| <i>Gozmanyina majestus</i> (Marshall & Reeves, 1970)                                 | Trichthoniidae    | thelytokous | sex ratio |
| <i>Graptoppia sundensis</i> (Hammer, 1979)                                           | Oppiidae          | sexual      | inference |
| <i>Gustavia fusifer</i> (Koch, 1841)                                                 | Gustaviidae       | sexual      | inference |
| <i>Gustavia microcephala</i> (Nicolet, 1855)                                         | Gustaviidae       | sexual      | inference |
| <i>Gymnodamaeus bicostatus</i> (Koch, 1835)                                          | Gymnodamaeidae    | sexual      | sex ratio |

|                                                                                            |                  |             |                    |
|--------------------------------------------------------------------------------------------|------------------|-------------|--------------------|
| <i>Hammerella parasufflata</i> Ermilov, Sandmann, Marian & Maraun, 2013                    | Granuloppiidae   | sexual      | inference          |
| <i>Haplochthonius sanctaeluciae</i> Bernini, 1973                                          | Haplochthoniidae | thelytokous | inference          |
| <i>Hellenamerus ionicus</i> Mahunka, 1974                                                  | Amerobelbidae    | sexual      | inference          |
| <i>Hemileius initialis</i> (Berlese, 1908)                                                 | Hemileiidae      | sexual      | inference          |
| <i>Hemileius perforatoides</i> (Hammer, 1979)                                              | Hemileiidae      | sexual      | inference          |
| <i>Heminothrus ornatissimus</i> (Berlese, 1910)                                            | Crotoniidae      | thelytokous | sex ratio, rearing |
| <i>Heminothrus targionii</i> (Berlese, 1885)                                               | Crotoniidae      | thelytokous | sex ratio          |
| <i>Hermannia gladiata</i> (Aoki, 1965)                                                     | Hermanniiidae    | sexual      | inference          |
| <i>Hermannia convexa</i> (Koch, 1839)                                                      | Hermanniiidae    | sexual      | inference          |
| <i>Hermannia gibba</i> (Koch, 1839)                                                        | Hermanniiidae    | sexual      | sex ratio          |
| <i>Hermannia reticulata</i> Thörell, 1871                                                  | Hermanniiidae    | sexual      | inference          |
| <i>Hermannia similis</i> (Balogh & Mahunka, 1967)                                          | Hermanniiidae    | sexual      | inference          |
| <i>Hermannia subglabra</i> Berlese, 1910                                                   | Hermanniiidae    | sexual      | inference          |
| <i>Hermannella dolosa</i> Grandjean, 1931                                                  | Hermannelliidae  | sexual      | inference          |
| <i>Hermannobates monstruosus</i> Hammer, 1961                                              | Hermannelliidae  | sexual      | inference          |
| <i>Heterobelba galerulata</i> Berlese, 1913                                                | Heterobelbidae   | sexual      | inference          |
| <i>Heterobelba oxapampensis</i> Beck, 1962                                                 | Heterobelbidae   | sexual      | inference          |
| <i>Heteroleius longissimus</i> Balogh & Mahunka, 1966                                      | Hemileiidae      | sexual      | inference          |
| <i>Hoplophorella cucullata</i> (Ewing, 1909)                                               | Phthiracaridae   | sexual      | inference          |
| <i>Hoplophorella vitrina</i> (Berlese, 1913)                                               | Phthiracaridae   | sexual      | inference          |
| <i>Hoplophthiracarus illinoisensis</i> (Ewing, 1909)                                       | Phthiracaridae   | sexual      | inference          |
| <i>Hypocephalus mirabilis</i> Krivolutsky, 1971                                            | Cepheidae        | sexual      | inference          |
| <i>Hypochthoniella minutissima</i> (Berlese, 1903)                                         | Eniochthoniidae  | thelytokous | sex ratio          |
| <i>Hypochthonius luteus</i> Oudemans, 1917                                                 | Hypochthoniidae  | thelytokous | sex ratio          |
| <i>Hypochthonius rufulus</i> C.L. Koch, 1835                                               | Hypochthoniidae  | thelytokous | sex ratio          |
| <i>Idiozetes javensis</i> Hammer, 1979                                                     | Eremaeozetidae   | sexual      | inference          |
| <i>Indoribates microsetosus</i> Ermilov & Anichkin, 2011                                   | Haplozetidae     | sexual      | inference          |
| <i>Indoribates paraminimicoma</i> (Ermilov, Bayartogtokh, Sandmann, Marian & Maraun, 2013) | Haplozetidae     | sexual      | inference          |
| <i>Indoribates punctulatus</i> (Sellnick, 1925)                                            | Haplozetidae     | sexual      | inference          |
| <i>Indoribates vindobonensis</i> (Willmann, 1935)                                          | Haplozetidae     | sexual      | inference          |
| <i>Insculptoppia insculpta</i> (Paoli, 1908)                                               | Oppiidae         | sexual      | inference          |
| <i>Jacotella reticulata</i> Ruiz, Kahwash & Subías, 1990                                   | Gymnodamaeidae   | sexual      | sex ratio          |
| <i>Javacarus jocelynae</i> Judson, 1991                                                    | Lohmanniidae     | thelytokous | inference          |



|                                                       |                   |             |           |
|-------------------------------------------------------|-------------------|-------------|-----------|
| <i>Javacarus kuehnelti</i> Balogh, 1961               | Lohmanniidae      | thelytokous | inference |
| <i>Joelia fiorii</i> (Coggi, 1898)                    | Oribatellidae     | sexual      | inference |
| <i>Karenella acuta</i> (Csiszár, 1961)                | Oppiidae          | sexual      | inference |
| <i>Kokoppia dudichi</i> (Balogh, 1982)                | Oppiidae          | sexual      | inference |
| <i>Kuklosuctobelba claviseta</i> (Hammer, 1961)       | Suctobelbidae     | thelytokous | inference |
| <i>Lamellobates misella</i> (Berlese, 1910)           | Oribatellidae     | sexual      | inference |
| <i>Lamellobates molecula</i> (Berlese, 1916)          | Oribatellidae     | sexual      | inference |
| <i>Lauritzenia minimicoma</i> (Beck, 1964)            | Haplozetidae      | sexual      | inference |
| <i>Lauropia falcata</i> (Strenzke, 1951)              | Oppiidae          | sexual      | sex ratio |
| <i>Lauropia fallax</i> (Paoli, 1908)                  | Oppiidae          | sexual      | inference |
| <i>Lauropia maritima</i> (Willmann, 1928)             | Oppiidae          | sexual      | inference |
| <i>Lauropia similifallax</i> Subías & Mínguez, 1986   | Oppiidae          | sexual      | inference |
| <i>Leptogalumna ciliata</i> Balogh, 1960              | Galumnidae        | sexual      | inference |
| <i>Liacarus acutus</i> Pschorn-Walcher, 1951          | Liacaridae        | sexual      | inference |
| <i>Liacarus brevilamellatus</i> Mihelčič, 1955        | Liacaridae        | sexual      | inference |
| <i>Liacarus koeszegiensis</i> Balogh, 1943            | Liacaridae        | sexual      | inference |
| <i>Liacarus nitens</i> (Gervais, 1844)                | Liacaridae        | sexual      | inference |
| <i>Liacarus subterraneus</i> (Koch, 1844)             | Liacaridae        | sexual      | sex ratio |
| <i>Liacarus xylariae</i> (Schrank, 1803)              | Liacaridae        | sexual      | inference |
| <i>Licneremaeus embeyisztini</i> Mahunka, 1980        | Licneremaeidae    | sexual      | inference |
| <i>Licneremaeus licnophorus</i> (Michael, 1882)       | Licneremaeidae    | sexual      | inference |
| <i>Licnodamaeus costula</i> Grandjean, 1931           | Licnodamaeidae    | sexual      | inference |
| <i>Licnozetes granulatus</i> (Balogh & Mahunka, 1969) | Microzetidae      | sexual      | inference |
| <i>Liebstadia humerata</i> Sellnick, 1928             | Liebstadiidae     | sexual      | inference |
| <i>Liebstadia longior</i> (Berlese, 1908)             | Liebstadiidae     | sexual      | inference |
| <i>Liebstadia similis</i> (Michael, 1888)             | Liebstadiidae     | sexual      | sex ratio |
| <i>Liochthonius alpestris</i> (Forsslund, 1958)       | Brachychthoniidae | thelytokous | inference |
| <i>Liochthonius brevis</i> (Michael, 1888)            | Brachychthoniidae | thelytokous | inference |
| <i>Liochthonius dilutus</i> Moritz, 1976              | Brachychthoniidae | thelytokous | inference |
| <i>Liochthonius evansi</i> (Forsslund, 1958)          | Brachychthoniidae | thelytokous | inference |
| <i>Liochthonius fimbriatissimus</i> Hammer, 1962      | Brachychthoniidae | thelytokous | inference |
| <i>Liochthonius mollis</i> (Hammer, 1958)             | Brachychthoniidae | thelytokous | inference |
| <i>Liochthonius moritzi</i> Balogh & Mahunka, 1983    | Brachychthoniidae | thelytokous | inference |

|                                                                           |                   |             |           |
|---------------------------------------------------------------------------|-------------------|-------------|-----------|
| <i>Liochthonius neglectus</i> Moritz, 1976                                | Brachychthoniidae | thelytokous | inference |
| <i>Liochthonius peduncularius</i> (Strenzke, 1951)                        | Brachychthoniidae | thelytokous | inference |
| <i>Liochthonius perfusorius</i> Moritz, 1976                              | Brachychthoniidae | thelytokous | inference |
| <i>Liochthonius propinquus</i> Niedbala, 1972                             | Brachychthoniidae | thelytokous | inference |
| <i>Liochthonius pseudohystricinus</i> Balogh & Mahunka, 1983              | Brachychthoniidae | thelytokous | inference |
| <i>Liochthonius rigidisetosus</i> Hammer, 1962                            | Brachychthoniidae | thelytokous | inference |
| <i>Liochthonius sellnicki</i> (Thor, 1930)                                | Brachychthoniidae | thelytokous | sex ratio |
| <i>Liochthonius simplex</i> (Forsslund, 1942)                             | Brachychthoniidae | thelytokous | inference |
| <i>Liochthonius strenzkei</i> Forsslund, 1963                             | Brachychthoniidae | thelytokous | inference |
| <i>Liochthonius tuxeni</i> (Forsslund, 1957)                              | Brachychthoniidae | thelytokous | inference |
| <i>Lohmannia hungarorum</i> Mahunka, 1980                                 | Lohmanniidae      | thelytokous | inference |
| <i>Lyroppia dongnaiensis</i> Ermilov & Anichkin, 2013                     | Oppiidae          | sexual      | inference |
| <i>Machadobelba longiciliata</i> Ermilov, Sandmann, Marian & Maraun, 2013 | Machadobelbidae   | sexual      | inference |
| <i>Machuella ventrisetosa</i> Hammer, 1961                                | Machuellidae      | sexual      | inference |
| <i>Maculobates breviporosus</i> Mahunka, 1980                             | Liebstadiidae     | sexual      | inference |
| <i>Mahunkana japonica</i> (Aoki & Karasawa, 2007)                         | Eremulidae        | sexual      | inference |
| <i>Malacoangelia remigera</i> Berlese, 1913                               | Hypochthoniidae   | thelytokous | sex ratio |
| <i>Malaconothrus angulatus</i> Hammer, 1958                               | Malaconothridae   | thelytokous | inference |
| <i>Malaconothrus dipankari</i> Saha & Sanyal, 1996                        | Malaconothridae   | thelytokous | inference |
| <i>Malaconothrus dorsofoveolatus</i> Hammer, 1979                         | Malaconothridae   | thelytokous | inference |
| <i>Malaconothrus geminus</i> (Hammer, 1972)                               | Malaconothridae   | thelytokous | inference |
| <i>Malaconothrus gracilis</i> Hammen, 1952                                | Malaconothridae   | thelytokous | sex ratio |
| <i>Malaconothrus monodactylus</i> (Michael, 1888)                         | Malaconothridae   | thelytokous | inference |
| <i>Masthermannia mammillaris</i> (Berlese, 1904)                          | Nanhermanniidae   | thelytokous | inference |
| <i>Medioppia media</i> (Mihelčič, 1956)                                   | Oppiidae          | sexual      | inference |
| <i>Medioppia obsoleta</i> (Paoli, 1908)                                   | Oppiidae          | sexual      | inference |
| <i>Megalotocepheus brevisetus</i> (Mahunka, 1989)                         | Otocepheidae      | sexual      | inference |
| <i>Megalotocepheus crinitus</i> (Berlese, 1905)                           | Otocepheidae      | sexual      | inference |
| <i>Melanozetes mollicomus</i> (Koch, 1839)                                | Ceratozetidae     | sexual      | inference |
| <i>Meristacarus heterotrichus</i> Csiszár, 1961                           | Lohmanniidae      | thelytokous | inference |
| <i>Meristacarus porcula</i> Grandjean, 1934                               | Lohmanniidae      | thelytokous | inference |
| <i>Meristacarus sundensis</i> Hammer, 1979                                | Lohmanniidae      | thelytokous | inference |
| <i>Mesoplophora leviseta</i> Hammer, 1979                                 | Mesoplophoridae   | sexual      | inference |

|                                                          |                   |             |                    |
|----------------------------------------------------------|-------------------|-------------|--------------------|
| <i>Mesoplophora michaeliana</i> Berlese, 1904            | Mesoplophoridae   | sexual      | inference          |
| <i>Mesoplophora pulchra</i> Sellnick, 1928               | Mesoplophoridae   | sexual      | inference          |
| <i>Mesotritia nuda</i> (Berlese, 1887)                   | Oribotritiidae    | sexual      | inference          |
| <i>Metabelba flagelliseta</i> Bulanova-Zachvatkina, 1965 | Damaeidae         | sexual      | inference          |
| <i>Metabelba papillipes</i> (Nicolet, 1855)              | Damaeidae         | sexual      | inference          |
| <i>Metabelba propexa</i> (Kulczynski, 1902)              | Damaeidae         | sexual      | inference          |
| <i>Metabelba pulverosa</i> Strenzke, 1953                | Damaeidae         | sexual      | inference          |
| <i>Metabelbella interlamellaris</i> Pérez-Íñigo, 1987    | Damaeidae         | sexual      | inference          |
| <i>Micreremus brevipes</i> (Michael, 1888)               | Micreremidae      | sexual      | inference          |
| <i>Microppia minus</i> (Paoli, 1908)                     | Oppiidae          | thelytokous | sex ratio          |
| <i>Microtegeus borhdii</i> Balogh & Mahunka, 1974        | Microtegeidae     | sexual      | inference          |
| <i>Microtegeus reticulatus</i> Aoki, 1965                | Microtegeidae     | sexual      | inference          |
| <i>Microtegeus similis</i> Balogh & Mahunka, 1980        | Microtegeidae     | sexual      | inference          |
| <i>Microtritia minima</i> (Berlese, 1904)                | Euphthiracaridae  | thelytokous | sex ratio          |
| <i>Microtritia tropica</i> Märkel, 1964                  | Euphthiracaridae  | sexual      | inference          |
| <i>Microzetes adansoni</i> (Lions, 1966)                 | Microzetidae      | sexual      | inference          |
| <i>Microzetes caucasicus</i> (Krivolutsky, 1967)         | Microzetidae      | sexual      | inference          |
| <i>Microzetes mirandus</i> (Berlese, 1908)               | Microzetidae      | sexual      | inference          |
| <i>Microzetorchestes emeryi</i> (Coggi, 1898)            | Zetorchestidae    | sexual      | inference          |
| <i>Mixacarus foliifer</i> Golosova, 1984                 | Lohmanniidae      | thelytokous | inference          |
| <i>Mochlozetes chambrieri</i> Mahunka, 1990              | Mochlozetidae     | sexual      | inference          |
| <i>Mochlozetes ryukyuensis</i> Aoki, 2006                | Mochlozetidae     | sexual      | inference          |
| <i>Moritzoppia keilbachi</i> (Moritz, 1969)              | Oppiidae          | sexual      | inference          |
| <i>Moritzoppia unicarinata</i> (Paoli, 1908)             | Oppiidae          | sexual      | inference          |
| <i>Mucronothrus nasalis</i> (Willmann, 1929)             | Trhypochthoniidae | thelytokous | sex ratio, rearing |
| <i>Multioppia insularis</i> Mahunka, 1985                | Oppiidae          | sexual      | inference          |
| <i>Multioppia laniseta</i> Moritz, 1966                  | Oppiidae          | sexual      | inference          |
| <i>Multioppia tamdao</i> Mahunka, 1988                   | Oppiidae          | sexual      | inference          |
| <i>Multioppia wilsoni</i> Aoki, 1964                     | Oppiidae          | sexual      | inference          |
| <i>Nanhermannia coronata</i> Berlese, 1913               | Nanhermanniidae   | thelytokous | sex ratio          |
| <i>Nanhermannia elegantissima</i> Hammer, 1958           | Nanhermanniidae   | thelytokous | inference          |
| <i>Nanhermannia elegantula</i> Berlese, 1913             | Nanhermanniidae   | thelytokous | sex ratio, rearing |
| <i>Nanhermannia nana</i> (Nicolet, 1855)                 | Nanhermanniidae   | thelytokous | sex ratio, rearing |

|                                                                                    |                   |             |                    |
|------------------------------------------------------------------------------------|-------------------|-------------|--------------------|
| <i>Nehypochthonius porosus</i> Norton & Metz, 1980                                 | Nehypochthoniidae | thelytokous | sex ratio          |
| <i>Neoamerioppia longiclava</i> (Hammer, 1962)                                     | Oppiidae          | sexual      | inference          |
| <i>Neoamerioppia notata</i> (Hammer, 1958)                                         | Oppiidae          | sexual      | inference          |
| <i>Neoamerioppia rotunda</i> (Hammer, 1958)                                        | Oppiidae          | sexual      | inference          |
| <i>Neoamerioppia ventrosquamosa</i> (Hammer, 1979)                                 | Oppiidae          | sexual      | inference          |
| <i>Neoamerioppia vietnamica</i> (Mahunka, 1988)                                    | Oppiidae          | sexual      | inference          |
| <i>Neogalumna seniczaki</i> Ermilov and Anichkin, 2010                             | Galumnidae        | sexual      | inference          |
| <i>Neogalumna specifica</i> (Ermilov, Sandmann, Klarner, Widyastuti & Scheu, 2015) | Galumnidae        | sexual      | inference          |
| <i>Neolochthonius piluliferus</i> (Forslund, 1942)                                 | Brachychthoniidae | thelytokous | inference          |
| <i>Neoribates aurantiacus</i> (Oudemans, 1914)                                     | Parakalummidae    | sexual      | inference          |
| <i>Neoribates insignificans</i> (Mahunka, 1995)                                    | Parakalummidae    | sexual      | inference          |
| <i>Neoribates jacoti</i> (Balogh & Mahunka, 1967)                                  | Parakalummidae    | sexual      | inference          |
| <i>Neoribates paratuberculatus</i> Ermilov, Shtanchaeva & Subías, 2014             | Parakalummidae    | sexual      | inference          |
| <i>Neoribates spindleformis</i> Ermilov & Anichkink, 2012                          | Parakalummidae    | sexual      | inference          |
| <i>Neosuctobelba bituberculata</i> (Ermilov & Anichkin, 2013)                      | Suctobelbidae     | thelytokous | inference          |
| <i>Neosuctobelba transitoria</i> Balogh & Mahunka, 1969                            | Suctobelbidae     | thelytokous | inference          |
| <i>Neotrichoppia confinis</i> (Paoli, 1908)                                        | Oppiidae          | thelytokous | inference          |
| <i>Nortonbelba italica</i> Bernini, 1980                                           | Damaeidae         | sexual      | inference          |
| <i>Nothrus anauniensis</i> Canestrini & Fanzago, 1876                              | Nothridae         | thelytokous | sex ratio, rearing |
| <i>Nothrus borussicus</i> Sellnick, 1928                                           | Nothridae         | thelytokous | sex ratio          |
| <i>Nothrus palustris</i> Koch, 1839                                                | Nothridae         | thelytokous | sex ratio, rearing |
| <i>Nothrus pratensis</i> Sellnick, 1928                                            | Nothridae         | thelytokous | inference          |
| <i>Nothrus shapensis</i> Krivolutsky, 1998                                         | Nothridae         | thelytokous | inference          |
| <i>Nothrus silvestris</i> Nicolet, 1855                                            | Nothridae         | thelytokous | sex ratio, rearing |
| <i>Nothrus silvicus</i> Jacot, 1937                                                | Nothridae         | thelytokous | sex ratio          |
| <i>Nothrus willmanni</i> Mahunka, 1983                                             | Nothridae         | thelytokous | inference          |
| <i>Notophthiracarus heterotrichus</i> (Mahunka, 1979)                              | Phthiracaridae    | sexual      | inference          |
| <i>Novosuctobelba andrassyi</i> (Balogh & Mahunka, 1981)                           | Suctobelbidae     | thelytokous | inference          |
| <i>Novosuctobelba baculifera</i> (Balogh & Mahunka, 1981)                          | Suctobelbidae     | thelytokous | inference          |
| <i>Novosuctobelba inenodabilis</i> (Hammer, 1979)                                  | Suctobelbidae     | sexual      | inference          |
| <i>Odontocepheus oblongus</i> (Banks, 1895)                                        | Carabodidae       | sexual      | inference          |
| <i>Ophidiotrichus tectus</i> (Michael, 1884)                                       | Oribatellidae     | sexual      | sex ratio          |

|                                                          |                |             |                    |
|----------------------------------------------------------|----------------|-------------|--------------------|
| <i>Oppia denticulata</i> (G. & R. Canestrini, 1882)      | Oppiidae       | sexual      | inference          |
| <i>Oppia nitens</i> Koch, 1836                           | Oppiidae       | thelytokous | sex ratio          |
| <i>Oppiella translamellata</i> (Subías, 1980)            | Oppiidae       | sexual      | inference          |
| <i>Oppiella nova</i> (Oudemans, 1902)                    | Oppiidae       | thelytokous | sex ratio, rearing |
| <i>Oribata ornata</i> Coggi, 1900                        | Oribatellidae  | sexual      | inference          |
| <i>Oribatella berlesei</i> (Michael, 1898)               | Oribatellidae  | sexual      | inference          |
| <i>Oribatella calcarata</i> (Koch, 1835)                 | Oribatellidae  | sexual      | sex ratio          |
| <i>Oribatella colchica</i> Krivolutsky, 1974             | Oribatellidae  | sexual      | inference          |
| <i>Oribatella foliata</i> Krivolutsky, 1974              | Oribatellidae  | sexual      | inference          |
| <i>Oribatella gerdweigmanni</i> Ermilov & Anichkin, 2012 | Oribatellidae  | sexual      | inference          |
| <i>Oribatella hungarica</i> Balogh, 1943                 | Oribatellidae  | sexual      | inference          |
| <i>Oribatella longispina</i> Berlese, 1915               | Oribatellidae  | sexual      | inference          |
| <i>Oribatella malaya</i> Balogh & Mahunka, 1974          | Oribatellidae  | sexual      | inference          |
| <i>Oribatella nigra</i> Kulijev, 1967                    | Oribatellidae  | sexual      | inference          |
| <i>Oribatella quadricornuta</i> (Michael, 1880)          | Oribatellidae  | sexual      | sex ratio          |
| <i>Oribatella sexdentata</i> Berlese, 1916               | Oribatellidae  | sexual      | inference          |
| <i>Oribatella superbula</i> (Berlese, 1904)              | Oribatellidae  | sexual      | inference          |
| <i>Oribatella umaetluisorum</i> Ermilov & Anichkin, 2012 | Oribatellidae  | sexual      | inference          |
| <i>Oribatula interrupta</i> (Willmann, 1939)             | Oribatulidae   | sexual      | inference          |
| <i>Oribatula pannonica</i> Willmann, 1949                | Oribatulidae   | sexual      | inference          |
| <i>Oribatula tibialis</i> (Nicolet, 1855)                | Oribatulidae   | sexual      | sex ratio          |
| <i>Oribella pectinata</i> (Michael, 1885)                | Oribellidae    | sexual      | inference          |
| <i>Oribotritia berlesei</i> (Michael, 1898)              | Oribotritiidae | sexual      | inference          |
| <i>Oromurcia bicuspidata</i> Thor, 1930                  | Ceratozetidae  | sexual      | inference          |
| <i>Otocephus duplicornutus</i> Aoki, 1965                | Otocephidae    | sexual      | inference          |
| <i>Otocephus excelsus</i> Aoki, 1965                     | Otocephidae    | sexual      | inference          |
| <i>Otocephus heterosetiger</i> Aoki, 1965                | Otocephidae    | sexual      | inference          |
| <i>Otocephus spatulatus</i> Mahunka, 2000                | Otocephidae    | sexual      | inference          |
| <i>Otocephus vietnamicus</i> Ermilov & Anichkin, 2011    | Otocephidae    | sexual      | inference          |
| <i>Oxyamerus spathulatus</i> Aoki, 1965                  | Oxyameridae    | sexual      | inference          |
| <i>Oxyoppia bituberculata</i> (Balogh, 1958)             | Oppiidae       | sexual      | inference          |
| <i>Oxyoppia cubana</i> Balogh & Mahunka, 1980            | Oppiidae       | sexual      | inference          |

|                                                            |                 |             |           |
|------------------------------------------------------------|-----------------|-------------|-----------|
| <i>Oxyoppia suramericana</i> (Hammer, 1958)                | Oppiidae        | sexual      | inference |
| <i>Oxyoppia yepesensis</i> Muñoz-Mingarro, 1987            | Oppiidae        | sexual      | inference |
| <i>Palaeacarus hystricinus</i> Trägårdh, 1932              | Palaeacaridae   | thelytokous | sex ratio |
| <i>Pantelozetes cavaticus</i> (Kunst, 1962)                | Oribellidae     | sexual      | inference |
| <i>Pantelozetes paolii</i> (Oudemans, 1913)                | Oribellidae     | sexual      | sex ratio |
| <i>Papillacarus hirsutus</i> (Aoki, 1961)                  | Lohmanniidae    | thelytokous | inference |
| <i>Papillacarus polygonatus</i> Ermilov & Anichkin, 2011   | Lohmanniidae    | thelytokous | inference |
| <i>Papillacarus pseudoaciculatus</i> Mahunka, 1980         | Lohmanniidae    | thelytokous | inference |
| <i>Papillacarus ramosus</i> Balogh, 1961                   | Lohmanniidae    | thelytokous | inference |
| <i>Papillonotus hauseri</i> Mahunka, 1988                  | Papillonotidae  | sexual      | inference |
| <i>Parabelbella meridiana</i> (Norton, 1979)               | Damaeidae       | sexual      | inference |
| <i>Parachipteria punctata</i> (Nicolet, 1855)              | Achipteriidae   | sexual      | inference |
| <i>Parasuctobelba compacta</i> (Woas, 1986)                | Suctobelbidae   | thelytokous | inference |
| <i>Parasuctobelba complexa</i> (Hammer, 1958)              | Suctobelbidae   | thelytokous | inference |
| <i>Parasuctobelba subcomplexa</i> (Balogh & Mahunka, 1968) | Suctobelbidae   | thelytokous | inference |
| <i>Paratritia baloghi</i> Moritz, 1966                     | Oribotritiidae  | sexual      | inference |
| <i>Pasocephus kirai</i> (Aoki, 1976)                       | Carabodidae     | sexual      | inference |
| <i>Passalozetes africanus</i> Grandjean, 1932              | Passalozetidae  | sexual      | inference |
| <i>Pedrocortesella vietnamica</i> Ermilov & Anichkin, 2014 | Pheroliodidae   | sexual      | inference |
| <i>Pelops phaenotus</i> Koch, 1844                         | Phenopelopoidea | sexual      | inference |
| <i>Peloptulus reticulatus</i> Mihelčič, 1957               | Phenopelopidae  | sexual      | inference |
| <i>Peloribates europaeus</i> Willmann, 1935                | Haplozetidae    | sexual      | inference |
| <i>Peloribates glaber</i> Mihelčič, 1956                   | Haplozetidae    | sexual      | inference |
| <i>Peloribates kaszabi</i> Mahunka, 1988                   | Haplozetidae    | sexual      | inference |
| <i>Peloribates rangiroaensis</i> Hammer, 1972              | Haplozetidae    | sexual      | inference |
| <i>Peloribates stellatus</i> Balogh & Mahunka, 1967        | Haplozetidae    | sexual      | inference |
| <i>Pergalumna altera</i> (Oudemans, 1956)                  | Galumnidae      | sexual      | inference |
| <i>Pergalumna annulata</i> Mahunka, 1995                   | Galumnidae      | sexual      | inference |
| <i>Pergalumna cattienica</i> Ermilov & Anichkin, 2011      | Galumnidae      | sexual      | inference |
| <i>Pergalumna corniculata</i> (Berlese, 1905)              | Galumnidae      | sexual      | inference |
| <i>Pergalumna formicaria</i> (Berlese, 1905)               | Galumnidae      | sexual      | sex ratio |
| <i>Pergalumna hauseri</i> Mahunka, 1995                    | Galumnidae      | sexual      | inference |
| <i>Pergalumna hawaiiensis</i> (Jacot, 1934)                | Galumnidae      | sexual      | inference |

|                                                                                        |                  |             |                    |
|----------------------------------------------------------------------------------------|------------------|-------------|--------------------|
| <i>Pergalumna indistincta</i> Ermilov and Anichkin, 2011                               | Galumnidae       | sexual      | inference          |
| <i>Pergalumna kotschyi</i> Mahunka, 1989                                               | Galumnidae       | sexual      | inference          |
| <i>Pergalumna margaritata</i> Mahunka, 1989                                            | Galumnidae       | sexual      | inference          |
| <i>Pergalumna nervosa</i> (Berlese, 1915)                                              | Galumnidae       | sexual      | sex ratio          |
| <i>Pergalumna panayensis</i> Ermilov & Corpuz-Raros, 2015                              | Galumnidae       | sexual      | inference          |
| <i>Pergalumna paraindistincta</i> Ermilov, Sandmann, Klarner, Widyastuti & Scheu, 2015 | Galumnidae       | sexual      | inference          |
| <i>Pergalumna petrichosa</i> Mahunka, 1995                                             | Galumnidae       | sexual      | inference          |
| <i>Pergalumna pseudosejugal</i> Ermilov and Anichkin, 2012                             | Galumnidae       | sexual      | inference          |
| <i>Pergalumna pterinervis</i> (Canestrini, 1898)                                       | Galumnidae       | sexual      | inference          |
| <i>Pergalumna willmanni</i> (Krivolutskaja, 1952)                                      | Galumnidae       | sexual      | inference          |
| <i>Perscheloribates subtropicus</i> (Hammer, 1961)                                     | Scheloriobatidae | sexual      | inference          |
| <i>Perxylobates crassisetosus</i> Ermilov & Anichkin, 2011                             | Protoribatidae   | sexual      | inference          |
| <i>Perxylobates thanhoaensis</i> Ermilov, Vu, Trinh & Dao, 2011                        | Protoribatidae   | sexual      | inference          |
| <i>Phauloppia lucorum</i> (Koch, 1841)                                                 | Oribatulidae     | sexual      | inference          |
| <i>Phauloppia nemoralis</i> (Berlese, 1916)                                            | Oribatulidae     | sexual      | inference          |
| <i>Pheroliodes intermedius</i> (Hammer, 1961)                                          | Pherolioididae   | sexual      | inference          |
| <i>Phthiracarus bryobius</i> Jacot, 1930                                               | Phthiracaridae   | sexual      | inference          |
| <i>Phthiracarus crassus</i> Niedbala, 1983                                             | Phthiracaridae   | sexual      | inference          |
| <i>Phthiracarus ferrugienus</i> (Koch, 1841)                                           | Phthiracaridae   | sexual      | inference          |
| <i>Phthiracarus globosus</i> (Koch, 1841)                                              | Phthiracaridae   | sexual      | inference          |
| <i>Phthiracarus italicus</i> (Oudemans, 1900)                                          | Phthiracaridae   | sexual      | inference          |
| <i>Phthiracarus laevigatus</i> (Koch, 1841)                                            | Phthiracaridae   | sexual      | inference          |
| <i>Phthiracarus lentulus</i> (Koch, 1841)                                              | Phthiracaridae   | sexual      | inference          |
| <i>Phthiracarus longulus</i> (Koch, 1841)                                              | Phthiracaridae   | sexual      | inference          |
| <i>Phyllozetes emmae</i> (Berlese, 1910)                                               | Cosmochthoniidae | sexual      | inference          |
| <i>Pilobates carpetanus</i> Pérez-Íñigo, 1969                                          | Haplozetidae     | sexual      | inference          |
| <i>Pilogalumna crassiclava</i> (Berlese, 1915)                                         | Galumnidae       | sexual      | inference          |
| <i>Pilogalumna ornatula</i> Grandjean, 1956                                            | Galumnidae       | sexual      | inference          |
| <i>Pilogalumna tenuiclavata</i> (Berlese, 1908)                                        | Galumnidae       | sexual      | inference          |
| <i>Plasmobates asiaticus</i> Aoki, 1973                                                | Plasmobatidae    | sexual      | inference          |
| <i>Platyliodes doderleini</i> (Berlese, 1883)                                          | Neoliodidae      | sexual      | inference          |
| <i>Platynoethrus peltifer</i> (Koch, 1839)                                             | Crotoniidae      | thelytokous | sex ratio, rearing |
| <i>Platynoethrus punctatus</i> (L. Koch, 1879)                                         | Crotoniidae      | thelytokous | sex ratio          |

|                                                                            |                    |             |           |
|----------------------------------------------------------------------------|--------------------|-------------|-----------|
| <i>Plenotocepheus neotropicus</i> Ermilov, Sandmann, Marian & Maraun, 2013 | Tetracondylidae    | sexual      | inference |
| <i>Podopterotegaeus tectus</i> Aoki, 1969                                  | Podopterotegaeidae | thelytokous | sex ratio |
| <i>Poecilochthonius italicus</i> (Berlese, 1910)                           | Brachychthoniidae  | thelytokous | inference |
| <i>Poecilochthonius spiciger</i> (Berlese, 1910)                           | Brachychthoniidae  | thelytokous | sex ratio |
| <i>Porobelba spinosa</i> (Sellnick, 1920)                                  | Damaeidae          | sexual      | inference |
| <i>Poroliodes farinosus</i> (Koch, 1839)                                   | Neolioididae       | sexual      | inference |
| <i>Protoribates biscalpturatus</i> (Mahunka, 1988)                         | Protoribatidae     | sexual      | inference |
| <i>Protoribates capucinus</i> Berlese, 1908                                | Protoribatidae     | thelytokous | inference |
| <i>Protoribates cattienensis</i> Ermilov & Anichkin, 2011                  | Protoribatidae     | sexual      | inference |
| <i>Protoribates heterodactylus</i> Ermilov & Anichkin, 2011                | Protoribatidae     | sexual      | inference |
| <i>Protoribates lophotrichus</i> (Berlese, 1904)                           | Protoribatidae     | thelytokous | inference |
| <i>Protoribates maximus</i> (Mahunka, 1988)                                | Protoribatidae     | sexual      | inference |
| <i>Protoribates paracapucinus</i> (Mahunka, 1988)                          | Protoribatidae     | thelytokous | inference |
| <i>Pseuderemulus gladiator</i> Balogh & Mahunka, 1968                      | Eremulidae         | sexual      | inference |
| <i>Pseudoamerioppia barrancensis</i> (Hammer, 1961)                        | Oppiidae           | sexual      | inference |
| <i>Pseudotocepheus setiger</i> (Hammer, 1972)                              | Tetracondylidae    | sexual      | inference |
| <i>Pterochthonius angelus</i> (Berlese, 1910)                              | Atopochthoniidae   | thelytokous | sex ratio |
| <i>Pulchroppia elegans</i> Hammer, 1979                                    | Oppiidae           | sexual      | inference |
| <i>Pulchroppia roynortoni</i> Ermilov & Anichkin, 2011                     | Oppiidae           | sexual      | inference |
| <i>Punctoribates punctum</i> (Koch, 1839)                                  | Punctoribatidae    | sexual      | sex ratio |
| <i>Punctoribates sellnicki</i> Willmann, 1928                              | Punctoribatidae    | sexual      | inference |
| <i>Quadroppia circumita</i> (Hammer, 1961)                                 | Quadroppiidae      | sexual      | sex ratio |
| <i>Quadroppia media</i> Gordeeva, 1983                                     | Quadroppiidae      | sexual      | inference |
| <i>Quadroppia monstrosa</i> Hammer, 1979                                   | Quadroppiidae      | thelytokous | inference |
| <i>Quadroppia quadricarinata</i> (Michael, 1885)                           | Quadroppiidae      | thelytokous | sex ratio |
| <i>Ramusella chulumaniensis</i> (Hammer, 1958)                             | Oppiidae           | sexual      | inference |
| <i>Ramusella clavipectinata</i> (Michael, 1885)                            | Oppiidae           | sexual      | inference |
| <i>Ramusella elliptica</i> (Berlese, 1908)                                 | Oppiidae           | sexual      | inference |
| <i>Ramusella furcata</i> (Willmann, 1928)                                  | Oppiidae           | sexual      | inference |
| <i>Ramusella insculpta</i> (Paoli, 1908)                                   | Oppiidae           | sexual      | inference |
| <i>Ramusella mihelcici</i> (Pérez-Íñigo, 1965)                             | Oppiidae           | sexual      | inference |
| <i>Ramusella terricola</i> Subías & Rodríguez, 1986                        | Oppiidae           | sexual      | inference |
| <i>Rastellobata rastelligera</i> (Berlese, 1908)                           | Amerobelbidae      | sexual      | inference |



|                                                                |                   |             |           |
|----------------------------------------------------------------|-------------------|-------------|-----------|
| <i>Rhinoppia subpectinata</i> (Oudemans, 1900)                 | Oppiidae          | sexual      | sex ratio |
| <i>Rhynchoribates mirus</i> Beck, 1961                         | Rhynchoribatidae  | sexual      | inference |
| <i>Rostrozetes carinatus</i> Beck, 1965                        | Haplozetidae      | thelytokous | inference |
| <i>Rostrozetes florens</i> (Balogh, 1970)                      | Haplozetidae      | sexual      | inference |
| <i>Rostrozetes ovulum</i> (Berlese, 1908)                      | Haplozetidae      | thelytokous | sex ratio |
| <i>Rostrozetes shibai</i> Aoiki, 1976                          | Haplozetidae      | sexual      | inference |
| <i>Sabahtritia sarawak</i> Mahunka, 1996                       | Synichotritiidae  | sexual      | inference |
| <i>Sadocepheus undulatus</i> Aoki, 1965                        | Cepheidae         | sexual      | inference |
| <i>Scapheremaeus bicornutus</i> Hammer, 1971                   | Cymbaeremaeidae   | sexual      | inference |
| <i>Scapheremaeus corniger</i> (Berlese, 1908)                  | Cymbaeremaeidae   | sexual      | inference |
| <i>Scapheremaeus foveolatus</i> Mahunka, 1987                  | Cymbaeremaeidae   | sexual      | inference |
| <i>Schalleria brevisetosa</i> Ermilov, Sandmann & Maraun, 2013 | Microzetidae      | sexual      | inference |
| <i>Schalleria pectinata</i> Ermilov, Sandmann & Maraun, 2013   | Microzetidae      | sexual      | inference |
| <i>Scheloribates ascendens</i> Weigmann & Wunderle, 1990       | Scheloribatidae   | sexual      | inference |
| <i>Scheloribates barbatulus</i> Mihelčič, 1956                 | Scheloribatidae   | sexual      | inference |
| <i>Scheloribates elegans</i> Hammer, 1958                      | Scheloribatidae   | sexual      | inference |
| <i>Scheloribates elegantulus</i> Hammer, 1961                  | Scheloribatidae   | sexual      | inference |
| <i>Scheloribates fimbriatus</i> Thor, 1930                     | Scheloribatidae   | sexual      | inference |
| <i>Scheloribates kraepelini</i> (Berlese, 1908)                | Scheloribatidae   | sexual      | inference |
| <i>Scheloribates laevigatus</i> (Koch, 1835)                   | Scheloribatidae   | sexual      | sex ratio |
| <i>Scheloribates lanceoliger</i> (Berlese, 1908)               | Scheloribatidae   | sexual      | sex ratio |
| <i>Scheloribates laticlava</i> Hammer, 1961                    | Scheloribatidae   | sexual      | inference |
| <i>Scheloribates luminosus</i> Hammer, 1961                    | Scheloribatidae   | sexual      | inference |
| <i>Scheloribates luteomarginatus</i> Hammer, 1958              | Scheloribatidae   | sexual      | inference |
| <i>Scheloribates mahunkai</i> Subias, 2010                     | Scheloribatidae   | sexual      | inference |
| <i>Scheloribates pallidulus</i> (Koch, 1841)                   | Scheloribatidae   | sexual      | inference |
| <i>Scheloribates vulgaris</i> Hammer, 1961                     | Scheloribatidae   | sexual      | inference |
| <i>Scutovertex sculptus</i> Michael, 1879                      | Scutoverticidae   | sexual      | inference |
| <i>Sellnickochthonius cricoides</i> (Weis-Fogh, 1948)          | Brachychthoniidae | thelytokous | sex ratio |
| <i>Sellnickochthonius elsosneadensis</i> (Hammer, 1958)        | Brachychthoniidae | thelytokous | inference |
| <i>Sellnickochthonius foliatus</i> (Hammer, 1958)              | Brachychthoniidae | thelytokous | inference |
| <i>Sellnickochthonius honestus</i> (Moritz, 1976)              | Brachychthoniidae | thelytokous | inference |
| <i>Sellnickochthonius immaculatus</i> (Forsslund, 1942)        | Brachychthoniidae | thelytokous | inference |

|                                                                       |                    |             |           |
|-----------------------------------------------------------------------|--------------------|-------------|-----------|
| <i>Sellnickochthonius lydiae</i> (Jacot, 1938)                        | Brachychthoniidae  | thelytokous | sex ratio |
| <i>Sellnickochthonius muara</i> Mahunka, 1995                         | Brachychthoniidae  | thelytokous | inference |
| <i>Sellnickochthonius zelawaiensis</i> (Sellnick, 1928)               | Brachychthoniidae  | thelytokous | inference |
| <i>Siculobata leontonycha</i> (Berlese, 1910)                         | Hemileiidae        | sexual      | inference |
| <i>Singabodes rarus</i> Mahunka, 1998                                 | Carabodidae        | sexual      | inference |
| <i>Solenozetes carinatus</i> (Hammer, 1961)                           | Plasmobatidae      | sexual      | inference |
| <i>Solenozetes flagellifer</i> Mahunka, 1983                          | Plasmobatidae      | sexual      | inference |
| <i>Sphaerochthonius splendidus</i> (Berlese, 1904)                    | Sphaerochthoniidae | sexual      | inference |
| <i>Sphaerozetes chavinensis</i> (Hammer, 1961)                        | Ceratozetidae      | sexual      | inference |
| <i>Sphaerozetes piriformis</i> (Nicolet, 1855)                        | Ceratozetidae      | sexual      | inference |
| <i>Steganacarus applicatus</i> (Sellnick, 1920)                       | Phthiracaridae     | sexual      | inference |
| <i>Steganacarus brevipilus</i> (Berlese, 1923)                        | Phthiracaridae     | sexual      | inference |
| <i>Steganacarus carinatus</i> (Koch, 1841)                            | Phthiracaridae     | sexual      | inference |
| <i>Steganacarus herculeanus</i> Willmann, 1953                        | Phthiracaridae     | sexual      | inference |
| <i>Steganacarus magnus</i> (Nicolet, 1855)                            | Phthiracaridae     | sexual      | inference |
| <i>Steganacarus patruelis</i> Niedbala, 1983                          | Phthiracaridae     | sexual      | inference |
| <i>Steganacarus spinosus</i> (Sellnick, 1920)                         | Phthiracaridae     | sexual      | inference |
| <i>Sternoppia brasiliensis</i> Franklin & Woas, 1992                  | Oppiidae           | sexual      | inference |
| <i>Sternoppia incisa</i> Balogh & Mahunka, 1977                       | Oppiidae           | sexual      | inference |
| <i>Sternoppia mirabilis</i> Balogh & Mahunka, 1968                    | Oppiidae           | sexual      | inference |
| <i>Sternoppia paraincisa</i> Ermilov, Sandmann, Marian & Maraun, 2013 | Oppiidae           | sexual      | inference |
| <i>Striatoppia lanceolata</i> Hammer, 1972                            | Oppiidae           | sexual      | inference |
| <i>Striatoppia modesta</i> Mahunka, 1988                              | Oppiidae           | sexual      | inference |
| <i>Striatoppia opuntiseta</i> Balogh & Mahunka, 1968                  | Oppiidae           | sexual      | inference |
| <i>Subiasella quadrimaculata</i> (Evans, 1952)                        | Oppiidae           | sexual      | inference |
| <i>Suctobelba altvateri</i> Moritz, 1970                              | Suctobelbidae      | thelytokous | inference |
| <i>Suctobelba granulata</i> Hammen, 1952                              | Suctobelbidae      | thelytokous | inference |
| <i>Suctobelbata prelli</i> (Märkel & Meyer, 1958)                     | Suctobelbidae      | thelytokous | inference |
| <i>Suctobelbella acutidens duplex</i> (Strenzke, 1950)                | Suctobelbidae      | thelytokous | inference |
| <i>Suctobelbella acutidens sarekensis</i> (Forsslund, 1941)           | Suctobelbidae      | thelytokous | inference |
| <i>Suctobelbella acutidens</i> (Forsslund, 1941)                      | Suctobelbidae      | thelytokous | inference |

|                                                                       |                   |             |           |
|-----------------------------------------------------------------------|-------------------|-------------|-----------|
| <i>Suctobelbella carcharodon</i> Moritz, 1966                         | Suctobelbidae     | thelytokous | inference |
| <i>Suctobelbella elegantula</i> (Hammer, 1958)                        | Suctobelbidae     | thelytokous | inference |
| <i>Suctobelbella forsslundi</i> (Strenzke, 1950)                      | Suctobelbidae     | thelytokous | inference |
| <i>Suctobelbella hurshi</i> Jacot, 1937                               | Suctobelbidae     | thelytokous | sex ratio |
| <i>Suctobelbella indica</i> (Haq, 1978)                               | Suctobelbidae     | thelytokous | inference |
| <i>Suctobelbella laevis</i> Jacot, 1938                               | Suctobelbidae     | thelytokous | sex ratio |
| <i>Suctobelbella latirostris</i> (Strenzke, 1950)                     | Suctobelbidae     | thelytokous | inference |
| <i>Suctobelbella longicuspis</i> Jacot, 1937                          | Suctobelbidae     | thelytokous | inference |
| <i>Suctobelbella palustris</i> (Forsslund, 1953)                      | Suctobelbidae     | thelytokous | inference |
| <i>Suctobelbella parallelodentata</i> Hammer, 1979                    | Suctobelbidae     | thelytokous | inference |
| <i>Suctobelbella peracuta</i> (Balogh & Mahunka, 1980)                | Suctobelbidae     | thelytokous | inference |
| <i>Suctobelbella phylliformis</i> Ermilov, Shtanchaeva & Subías, 2014 | Suctobelbidae     | thelytokous | inference |
| <i>Suctobelbella pilifera</i> (Mahunka, 1978)                         | Suctobelbidae     | thelytokous | inference |
| <i>Suctobelbella plumata</i> (Hammer, 1979)                           | Suctobelbidae     | thelytokous | inference |
| <i>Suctobelbella reticulata</i> (Hammer, 1982)                        | Suctobelbidae     | thelytokous | inference |
| <i>Suctobelbella semiplumosa</i> (Balogh & Mahunka, 1967)             | Suctobelbidae     | thelytokous | inference |
| <i>Suctobelbella sicilifera</i> (Hammer, 1961)                        | Suctobelbidae     | thelytokous | inference |
| <i>Suctobelbella similis</i> (Forsslund, 1941)                        | Suctobelbidae     | thelytokous | sex ratio |
| <i>Suctobelbella subcornigera</i> (Forsslund, 1941)                   | Suctobelbidae     | thelytokous | sex ratio |
| <i>Suctobelbella variosetosa</i> (Hammer, 1961)                       | Suctobelbidae     | thelytokous | inference |
| <i>Suctobelbilla approximata</i> Balogh, 1968                         | Suctobelbidae     | thelytokous | inference |
| <i>Suctobelbilla dentata</i> (Hammer, 1961)                           | Suctobelbidae     | thelytokous | inference |
| <i>Suctobelbilla multituberculata</i> Hammer, 1979                    | Suctobelbidae     | thelytokous | inference |
| <i>Suctobelbilla peruensis</i> Woas, 1986                             | Suctobelbidae     | thelytokous | inference |
| <i>Suctobelbilla tuberculata</i> Aoki, 1970                           | Suctobelbidae     | thelytokous | inference |
| <i>Suctobelbilla undulata</i> Hammer, 1979                            | Suctobelbidae     | thelytokous | inference |
| <i>Suctoribates foliatus</i> Mahunka, 1997                            | Rhynchoribatidae  | sexual      | inference |
| <i>Suctotegeus tumescitus</i> Mahunka, 1987                           | Microtegeidae     | sexual      | inference |
| <i>Sumatrotrititia inusitata</i> Mahunka, 1989                        | Euphthiracaridae  | sexual      | inference |
| <i>Synchthonius crenulatus</i> (Jacot, 1938)                          | Brachychthoniidae | thelytokous | inference |
| <i>Taiwanoppia hungarorum</i> (Mahunka, 1988)                         | Oppiidae          | sexual      | inference |
| <i>Tecteremaeus cornutus</i> Hammer, 1961                             | Arceremaeidae     | sexual      | inference |
| <i>Tecteremaeus hauseri</i> Mahunka, 1982                             | Arceremaeidae     | sexual      | inference |

|                                                            |                   |             |                    |
|------------------------------------------------------------|-------------------|-------------|--------------------|
| <i>Tecteremaeus incompletus</i> Mahunka, 1988              | Arceremaeidae     | sexual      | inference          |
| <i>Tectocephus alatus</i> Berlese, 1913                    | Tectocepheidae    | thelytokous | inference          |
| <i>Tectocephus minor</i> Berlese, 1903                     | Tectocepheidae    | thelytokous | sex ratio          |
| <i>Tectocephus sarekensis</i> (Trägårdh, 1910)             | Tectocepheidae    | thelytokous | sex ratio          |
| <i>Tectocephus velatus</i> (Michael, 1880)                 | Tectocepheidae    | thelytokous | sex ratio          |
| <i>Tegeocranellus laevis</i> (Berlese, 1905)               | Tegeocranellidae  | sexual      | inference          |
| <i>Tegeozetes tunicatus</i> Berlese, 1913                  | Tectocepheidae    | sexual      | inference          |
| <i>Teratoppia pluripectinata</i> Balogh & Mahunka, 1978    | Oppiidae          | sexual      | inference          |
| <i>Thamnacarus longisetosus</i> Bulanova-Zachvatkina, 1978 | Lohmanniidae      | thelytokous | inference          |
| <i>Totobates discifer</i> Hammer, 1961                     | Liebstaadiidae    | sexual      | inference          |
| <i>Trachyoribates ampulla</i> (Berlese, 1905)              | Haplozetidae      | sexual      | inference          |
| <i>Trhypochthoniellus longisetus</i> (Berlese, 1904)       | Trhypochthoniidae | thelytokous | inference          |
| <i>Trhypochthonius americanus</i> (Ewing, 1908)            | Trhypochthoniidae | thelytokous | sex ratio, rearing |
| <i>Trhypochthonius tectorum</i> (Berlese, 1896)            | Trhypochthoniidae | thelytokous | sex ratio, rearing |
| <i>Trichogalumna nipponica</i> (Aoki, 1966)                | Galumnidae        | sexual      | inference          |
| <i>Trichoribates caucasicus</i> Shaldybina, 1971           | Ceratozetidae     | sexual      | inference          |
| <i>Trichoribates hammerae</i> Subías, 2010                 | Ceratozetidae     | sexual      | inference          |
| <i>Trichoribates incisellus</i> (Kramer, 1897)             | Ceratozetidae     | sexual      | inference          |
| <i>Trichoribates novus</i> (Sellnick, 1928)                | Ceratozetidae     | sexual      | inference          |
| <i>Tritegeus bifidatus</i> Grandjean, 1953                 | Cepheidae         | sexual      | inference          |
| <i>Trypogalumnella poronota</i> Mahunka, 1995              | Galumnellidae     | sexual      | inference          |
| <i>Tyrphonothrus cordisetus</i> (Mahunka, 1993)            | Malaconothridae   | thelytokous | inference          |
| <i>Tyrphonothrus maior</i> Berlese, 1910                   | Malaconothridae   | thelytokous | inference          |
| <i>Tyrphonothrus saxosus</i> (Knülle, 1957)                | Malaconothridae   | thelytokous | inference          |
| <i>Unguizetes cattienensis</i> Ermilov & Anichkin, 2013    | Mochlozetidae     | sexual      | inference          |
| <i>Unguizetes clavatus</i> Aoki, 1967                      | Mochlozetidae     | sexual      | inference          |
| <i>Unguizetes latus</i> Ermilov & Anichkin, 2013           | Mochlozetidae     | sexual      | inference          |
| <i>Unguizetes sphaerula</i> (Berlese, 1905)                | Mochlozetidae     | sexual      | inference          |
| <i>Wallworkoppia machadoi</i> (Balogh, 1958)               | Oppiidae          | sexual      | inference          |
| <i>Xenillus clypeator</i> Robineau-Desvoidy, 1839          | Xenillidae        | sexual      | inference          |
| <i>Xenillus tegeocranus</i> (Hermann, 1804)                | Xenillidae        | sexual      | inference          |
| <i>Xenolohmannia comosa</i> Balogh, 1984                   | Lohmanniidae      | thelytokous | inference          |

|                                                                             |                 |        |           |
|-----------------------------------------------------------------------------|-----------------|--------|-----------|
| <i>Yoshiobodes aokii</i> Mahunka, 1987                                      | Carabodidae     | sexual | inference |
| <i>Yoshiobodes biconcavus</i> Ermilov, Shtanchaeva, Subías & Anichkin, 2014 | Carabodidae     | sexual | inference |
| <i>Yoshiobodes nakatamarii</i> (Aoki, 1973)                                 | Carabodidae     | sexual | inference |
| <i>Zachvatkinibates quadrivertex</i> (Halbert, 1920)                        | Punctoribatidae | sexual | inference |
| <i>Zetomimus furcatus</i> Warburton and Pearce, 1905                        | Ceratozetidae   | sexual | inference |
| <i>Zetorchestes grandjeani</i> Krisper, 1987                                | Zetorchestidae  | sexual | inference |
| <i>Zetorchestes novaguineanus</i> Krisper, 1987                             | Zetorchestidae  | sexual | inference |
| <i>Zetorchestes saltator</i> Oudemans, 1915                                 | Zetorchestidae  | sexual | inference |

- Beck L (1969) Zum jahreszeitlichen Massenwechsel zweier Oribatidenarten (Acari) im neotropischen Überschwemmungswald. Zool. Anz. (Suppl.) 32, 535-540
- Cianciolo JM (2001) Ecological distribution of asexual oribatid mites: a test of the Red Queen hypothesis. MSc Thesis, State University of New York, Syracuse, New York
- Domes K, Scheu S, Maraun M (2007) Resources and sex: soil re-colonization by sexual and parthenogenetic oribatid mites. Pedobiologia 51, 1-11
- Fujikawa T (1988) Biological features of *Oppiella nova* (Oudemans) in a Nature farming field. Edaphologia 38, 1-10
- Grandjean F (1941) Statistique sexuelle et parthénogénèse chez les Oribates (Acariens). C. R. Séanc. Ac. Sci. 212, 463-467
- Grandjean F (1947) Observations sur les Acariens (10e série). Bull. Mus. Nat. Hist. Natur. 19, 76-83
- Grandjean F (1950) Étude sur les Lohmanniidae (Oribates, Acariens). Arch. Zool. Exp. Gén. 87, 95-161
- Grandjean F (1955) Observations sur les Oribates (32e série). Bull. Mus. Nat. Hist. Natur. 27, 212-219
- Grandjean F (1961) Nouvelles observations sur les Oribates (Ire série). Acarologia 3, 206-231
- Harding DJL (1969) Seasonal changes in the abundance of Cryptostigmata in the forest floor of an oak woodland, pp. 31-35. In G. O. Evans (ed.), Proc. 2nd Int. Congr. Acarology, London, pp. 31-35.
- Kaneko N (1989) Life histories of four oribatid mite species in a mull type soil in a cool temperate forest in Japan. Pedobiologia 33, 117-126
- Lions JC (1967) La prelarve de *Rhysotritia ardua* (C. L. Koch) 1836 (Acarien, Oribate). Acarologia 9, 273-83

- Luxton, M (1981) Studies on the oribatid mites of a Danish beech wood soil. IV. Developmental biology. *Pedobiologia* 21, 312-340
- Marshall VG, Reeves RM (1970) *Trichthonius majestus*, a new species of oribatid mite (Acariña: Cosmochthoniidae) from North America. *Acarologia* 12, 623-632
- Norton RA, Metz L (1980) Nehypochthoniidae (Acari: Oribatei), a new mite family from the southeastern United States. *Ann. Entomol. Soc. Amer.* 73, 54-62
- Norton RA, Kethley JB, Johnston DE, OConnor BM (1993) Phylogenetic perspectives on genetic systems and reproductive modes of mites. In: Wrensch D, Ebbert M (
- Palmer SC, Norton RA (1990) Further experimental proof of thelytokous parthenogenesis in oribatid mites (Acari: Oribatida: Desmonomata). *Exper. Appl. Acarol.* 8, :
- Palmer SC, Norton RA (1991) Taxonomic, geographic, and seasonal distribution of thelytokous parthenogenesis in Desmonomata (Acari: Oribatida). *Exper. Appl. Aca*
- Ryabinin NA, Pankov AN (1987) The role of parthenogenesis in the biology of armored mites. *Ecologia, Academia Nauka, USSR* 1987, pp. 62-64
- Saichuae P, Gerson U, Henis Y (1972) Observations on the feeding and life history of the mite *Nothrus biciliatus* (Koch). *Soil Biol. Biochem.* 4, 155-164
- Sengbusch HG, Sengbusch CH (1970) Post-embryonic development of *Oppia nitens* (Acarina: Oribatei). *J. N.Y. Entomol. Soc.* 78, 207-214
- Sitnikova LG (1962) A brief outline of the oribatid mite fauna (Acariformes, Oribatei) of the Leningrad region. *Trud. Zool. Instit. Acad. Nauk, CCCP* 31, 429-452 (In Rus
- Solhoy T (1975) Dynamics of Oribatei populations on Hardangervidda, pp. 111-116. In F. Wielgolaski (ed.). *Fennoscandian Tundra Ecosystems. Part 2: Animals and S*
- Subias LS (2022) Listado sistemático, sinonímico y biogeográfico de los ácaros oribátidos (Acariformes: Oribatida) del mundo (excepto fósiles) (17ª actualización). ht
- Trave J (1963) Ecologie et biologie des Oribates (Acariens) saxicoles et arboricoles. *Vie et Milieu, Suppl.* 14, pp. i-viii and 1-267
- Wehner K, Schuster R, Simons NK, Norton RA, Blüthgen N, Heethoff M (2021) How land-use intensity affects sexual and parthenogenetic oribatid mites in temperate

n and area (km<sup>2</sup>) of the studied oribatid mite species.

| Reference                            |
|--------------------------------------|
| Domes et al. (2007)                  |
|                                      |
| Wehner et al. (2021)                 |
|                                      |
|                                      |
| Grandjean (1941), Lions (1967)       |
| Harding (1969), Wehner et al. (2021) |
|                                      |
| Wehner et al. (2021)                 |
|                                      |
|                                      |
|                                      |
| Palmer & Norton (1990, 1991)         |
|                                      |
|                                      |
|                                      |
| Palmer & Norton (1990, 1991)         |
|                                      |
| Cianciolo (2001)                     |
|                                      |
|                                      |
|                                      |
|                                      |
|                                      |
|                                      |
|                                      |
|                                      |
| Palmer & Norton (1990, 1991)         |

|                      |
|----------------------|
| Kaneko (1989)        |
|                      |
|                      |
|                      |
|                      |
| Cianciolo (2001)     |
|                      |
|                      |
|                      |
|                      |
|                      |
| Domes et al. (2007)  |
|                      |
|                      |
|                      |
|                      |
|                      |
|                      |
|                      |
| Wehner et al. (2021) |
| Wehner et al. (2021) |
|                      |
|                      |
|                      |
| Cianciolo (2001)     |
|                      |
| Wehner et al. (2021) |
|                      |
|                      |
|                      |





|                                                       |
|-------------------------------------------------------|
|                                                       |
|                                                       |
|                                                       |
|                                                       |
| Norton et al. (1993)                                  |
| Luxton (1981), Cianciolo (2001), Wehner et al. (2021) |
|                                                       |
|                                                       |
| Wehner et al. (2021)                                  |
|                                                       |
| Wehner et al. (2021)                                  |
|                                                       |
| Wehner et al. (2021)                                  |
|                                                       |
|                                                       |
|                                                       |
|                                                       |
|                                                       |
|                                                       |
|                                                       |
|                                                       |
| Grandjean (1950)                                      |
|                                                       |
|                                                       |
|                                                       |
|                                                       |
| Cianciolo (2001), Wehner et al. (2021)                |
| Cianciolo (2001)                                      |
|                                                       |
|                                                       |
|                                                       |
|                                                       |
|                                                       |
|                                                       |



|                      |
|----------------------|
|                      |
|                      |
| Grandjean 1941       |
|                      |
|                      |
|                      |
|                      |
|                      |
|                      |
|                      |
|                      |
|                      |
| Cianciolo (2001)     |
|                      |
|                      |
|                      |
|                      |
|                      |
| Grandjean (1941)     |
|                      |
|                      |
|                      |
| Wehner et al. (2021) |
| Domes et al. (2007)  |
|                      |
|                      |
|                      |
|                      |
|                      |
|                      |
|                      |
|                      |
| Wehner et al. (2021) |
|                      |

|                          |
|--------------------------|
|                          |
|                          |
|                          |
|                          |
|                          |
|                          |
|                          |
|                          |
|                          |
|                          |
| Cianciolo (2001)         |
|                          |
| Wehner et al. (2021)     |
|                          |
|                          |
|                          |
|                          |
|                          |
|                          |
|                          |
|                          |
|                          |
|                          |
|                          |
|                          |
|                          |
|                          |
| Norton et al. (1993)     |
|                          |
|                          |
|                          |
|                          |
|                          |
| Marshall & Reeves (1970) |
|                          |
|                          |
|                          |
|                          |
| Cianciolo (2001)         |

|                                          |
|------------------------------------------|
|                                          |
|                                          |
|                                          |
|                                          |
|                                          |
| Palmer & Norton (1990, 1991)             |
| Grandjean (1941), Palmer & Norton (1991) |
|                                          |
|                                          |
| Wehner et al. (2021)                     |
|                                          |
|                                          |
|                                          |
|                                          |
|                                          |
|                                          |
|                                          |
|                                          |
|                                          |
|                                          |
|                                          |
|                                          |
|                                          |
|                                          |
|                                          |
|                                          |
|                                          |
|                                          |
| Grandjean (1941)                         |
| Grandjean (1941)                         |
| Grandjean (1941), Wehner et al. (2021)   |
|                                          |
|                                          |
|                                          |
|                                          |
|                                          |
|                                          |
|                                          |
|                                          |
|                                          |
|                                          |
|                                          |
|                                          |
|                                          |
|                                          |
|                                          |
|                                          |
|                                          |
| Cianciolo (2001)                         |
|                                          |







|                                     |
|-------------------------------------|
|                                     |
|                                     |
|                                     |
|                                     |
|                                     |
|                                     |
|                                     |
|                                     |
|                                     |
|                                     |
| Luxton (1981), Wehner et al. (2021) |
|                                     |
|                                     |
|                                     |
| Grandjean (1941)                    |
|                                     |
|                                     |
|                                     |
|                                     |
|                                     |
|                                     |
|                                     |
|                                     |
|                                     |
|                                     |
|                                     |
|                                     |
| Palmer & Norton (1990, 1991)        |
|                                     |
|                                     |
|                                     |
|                                     |
|                                     |
| Domes et al. (2007)                 |
|                                     |
|                                     |
| Palmer & Norton (1990, 1991)        |
| Grandjean (1941, 1947)              |











|                                        |
|----------------------------------------|
| Wehner et al. (2021)                   |
|                                        |
|                                        |
|                                        |
| Beck (1969)                            |
|                                        |
|                                        |
|                                        |
|                                        |
|                                        |
|                                        |
|                                        |
|                                        |
|                                        |
|                                        |
|                                        |
|                                        |
|                                        |
|                                        |
|                                        |
|                                        |
|                                        |
|                                        |
| Cianciolo (2001), Wehner et al. (2021) |
| Cianciolo (2001)                       |
|                                        |
|                                        |
|                                        |
|                                        |
|                                        |
|                                        |
|                                        |
|                                        |
|                                        |
|                                        |
| Wehner et al. (2021)                   |
|                                        |
|                                        |
|                                        |
|                                        |









|  |
|--|
|  |
|  |
|  |
|  |
|  |
|  |
|  |
|  |
|  |

ork

: Acarology. Akademiai Kiado, Budapest

eds) Evolution and diversity of sex ratios in insects and mites

149-159

Acarol. 12, 67-81

ussian)

Systems Analysis. Berlin: Springer-Verlag

[http://bba.bioucm.es/cont/docs/RO\\_1.pdf](http://bba.bioucm.es/cont/docs/RO_1.pdf)

forests and grasslands in Germany. Exp. Appl. Acarol. 83, 34:

| <b>Distribution (according to Subias, 2022)</b>                                                    | <b>Area (km<sup>2</sup>)</b> |
|----------------------------------------------------------------------------------------------------|------------------------------|
| Holártica (Paleártica, y Neártica septentrional), India (Sikkim) e I. Santa                        | 65,811,786                   |
| Suiza                                                                                              | 41,285                       |
| Holártica (Paleártica, y U.S.A.: Virginia)                                                         | 54,210,785                   |
| Europa y Neotropical (Brasil y Argentina)                                                          | 21,274,830                   |
| Semicosmopolita: Holártica, Etiópica, Oriental (India: Kerala y China suroriental) y Nueva Zelanda | 101,240,508                  |
| Cosmopolita                                                                                        | 148,940,000                  |
| Paleártica y Oriental (Vietnam y Nepal)                                                            | 54,478,728                   |
| Semicosmopolita (Holártica, Etiópica: Somalia, Oriental y Neotropical: Panamá)                     | 85,213,074                   |
| Holártica (Paleártica occidental, Oeste de Siberia y U.S.A.: Minesota)                             | 24,308,220                   |
| Paleártica (Paleártica occidental: excepto Norte, y Paquistán)                                     | 12,818,317                   |
| Europa centromeridional                                                                            | 294,507                      |
| Oriental                                                                                           | 7,500,000                    |
| Pantropical                                                                                        | 27,604,311                   |
| Sumatra                                                                                            | 473,481                      |
| Vietnam                                                                                            | 331,212                      |
| Sumatra                                                                                            | 473,481                      |
| Tropical (Etiópica: Ghana, Oriental y Norte de Neotropical) y Japón                                | 22,477,975                   |
| Holártica y Noreste de Oriental                                                                    | 80,099,270                   |
| Este de U.S.A.                                                                                     | 1,791,708                    |
| Oriental y Neotropical (Perú)                                                                      | 8,779,996                    |
| Neotropical                                                                                        | 19,000,000                   |
| Paleártica meridional (Europa centromeridional e Irán)                                             | 1,826,102                    |
| Europa centromeridional e Irán                                                                     | 1,826,102                    |
| Mediterránea                                                                                       | 2,085,292                    |
| Ecuador                                                                                            | 283,561                      |
| Semicosmopolita (Holártica, Etiópica y Neotropical), Sahara occidental                             | 118,336,000                  |
| Península Malaya                                                                                   | 242,364                      |
| Pantropical (excepto Etiópica)                                                                     | 26,500,000                   |

|                                                                                                                                                |            |
|------------------------------------------------------------------------------------------------------------------------------------------------|------------|
| Semicosmopolita: Holártica (Neártica, Paleártica oriental meridional y Cáucaso), Oriental, Neotropical (Centroamérica) y Etiópica (Madagascar) | 37,914,527 |
| Norte de Neotropical                                                                                                                           | 9,054      |
| Oriental                                                                                                                                       | 7,500,000  |
| Neotropical y África occidental                                                                                                                | 25,409,409 |
| Oriental                                                                                                                                       | 7,500,000  |
| Europa centromeridional y Vietnam                                                                                                              | 625,719    |
| Semicosmopolita (Holártica, Oriental, Centroamérica y Australiana)                                                                             | 92,721,876 |
| Mediterránea                                                                                                                                   | 2,085,292  |
| Paleártica meridional (Mediterránea y Asia centrooccidental)                                                                                   | 3,419,776  |
| Paleártica                                                                                                                                     | 54,100,000 |
| Holártica (Paleártica, y Neártica septentrional)                                                                                               | 65,804,690 |
| Holártica (Paleártica y Canadá)                                                                                                                | 63,193,507 |
| Holártica, U.S.A. (Illinois) y Este de Rusia asiática                                                                                          | 77,000,000 |
| Japón y Oriental (Taiwán y Vietnam)                                                                                                            | 745,384    |
| Pantropical y Japón                                                                                                                            | 48,977,975 |
| Cuba                                                                                                                                           | 10,982     |
| Paleártica occidental (excepto Norte)                                                                                                          | 12,022,222 |
| Paleártica meridional (Mediterránea y Paleártica oriental meridional)                                                                          | 8,096,403  |
| Neotropical, India (Kerala) e Irán                                                                                                             | 20,570,458 |
| Pantropical y subtropical                                                                                                                      | 81,935,554 |
| Paleártica, Madagascar y Vietnam                                                                                                               | 55,012,752 |
| Europa centromeridional                                                                                                                        | 294,507    |
| Paleártica occidental y Asia centrooccidental                                                                                                  | 22,917,534 |
| Palaeartica meridional                                                                                                                         | 18,033,333 |
| Neotropical, Norte de India y Japón                                                                                                            | 20,798,975 |
| Neotropical                                                                                                                                    | 19,000,000 |
| Holártica                                                                                                                                      | 77,000,000 |
| Paleártica meridional (Europa centromeridional, Irán y Mongolia)                                                                               | 3,392,102  |
| Paleártica                                                                                                                                     | 54,100,000 |
| Holártica (Paleártica occidental, Canadá)                                                                                                      | 77,000,000 |
| Oriental y Australiana (Nueva Guinea)                                                                                                          | 8,286,000  |
| Mediterránea occidental                                                                                                                        | 1,390,195  |

|                                                                                  |             |
|----------------------------------------------------------------------------------|-------------|
| Italia (Sicilia)                                                                 | 25,426      |
| Paleártica occidental y Méjico                                                   | 23,555,599  |
| Holártica y China suroriental                                                    | 78,837,108  |
| Neotropical, Etiópica (Sudáfrica y Etiopía) y subantártica (I. Tristán da Cunha) | 21,214,650  |
| Holártica, Norte de Oriental, Etiópica (Etiopía) y Norte de Neotropical          | 82,975,556  |
| Holártica, Norte de Oriental, Etiópica (Etiopía) y Norte de Neotropical          | 82,975,556  |
| Neotropical (Perú y Chile)                                                       | 2,023,808   |
| Borealpina                                                                       | 78,249,340  |
| Semicosmopolita (Holártica, Oriental, Neotropical y Antártica)                   | 117,500,000 |
| Holártica y Oriental (China suroriental y Nepal)                                 | 78,984,624  |
| Semicosmopolita (Holártica, Norte de Oriental y Neotropical: Brasil y Panamá)    | 89,503,713  |
| Holártica (Paleártica, y U.S.A.: Virginia) y Centroamérica                       | 54,732,661  |
| Mediterránea                                                                     | 2,085,292   |
| Paleártica meridional (Mediterránea e Irán)                                      | 3,616,887   |
| I. Azores                                                                        | 2,351       |
| Holártica                                                                        | 77,000,000  |
| Paleártica occidental y U.S.A. (Virginia)                                        | 21,693,835  |
| Paleártica                                                                       | 27,594,161  |
| Holártica y Méjico.                                                              | 78,972,550  |
| Paleártica                                                                       | 18,822,265  |
| Paleártica (excepto Este de Paleártica oriental)                                 | 12,022,222  |
| Paleártica occidental                                                            | 21,583,050  |
| Holártica (Paleártica y Neártica septentrional)                                  | 6,580,469   |
| Polinesia (I. Samoa) y Vietnam                                                   | 334,054     |
| Paleártica                                                                       | 28,213,333  |
| Holártica (Paleártica occidental, Irán y Neártica septentrional)                 | 34,819,335  |
| Vietnam                                                                          | 331,212     |
| Borneo                                                                           | 751,936     |
| Neotropical                                                                      | 19,000,000  |
| Holártica (Paleártica, y U.S.A.: Carolina del Norte) y China suroriental         | 56,076,497  |
| Paleártica: Europa y Este de Rusia asiática                                      | 13,280,000  |
| Holártica y Oriental (China suroriental y Nepal)                                 | 78,984,623  |
| Holártica, Norte de Oriental y Centroamérica                                     | 81,592,031  |

|                                                                                                                              |             |
|------------------------------------------------------------------------------------------------------------------------------|-------------|
| Holártica (Paleártica y Neártica septentrional) y China suroriental                                                          | 67,641,797  |
| Holártica (Europa, Este de Paleártica oriental y Neártica septentrional)                                                     | 27,895,801  |
| Boreal                                                                                                                       | 66,823,100  |
| Bolivia                                                                                                                      | 1083301     |
| Neártica                                                                                                                     | 22,900,000  |
| Cosmopolita: Holártica, I. Santa Helena, Oriental, Nueva Zelanda, Neotropical y Antártica                                    | 103,769,360 |
| Semicosmopolita: Holártica, Oriental y Australiana (Nueva Zelanda)                                                           | 84,764,537  |
| Neártica occidental                                                                                                          | 7,633,333   |
| Holártica (Paleártica occidental, Este de Rusia asiática y Canadá)                                                           | 33,776,557  |
| Holártica: Paleártica (excepto Este) y Groenlandia                                                                           | 17,432,753  |
| Holártica e I. Seychelles                                                                                                    | 54,100,455  |
| Paleártica                                                                                                                   | 54,100,000  |
| Paleártica (Paleártica occidental, Irán y Este de Rusia asiática)                                                            | 26,517,528  |
| Paleártica (Europa, y Paleártica oriental: excepto Este)                                                                     | 30,330,851  |
| Vietnam                                                                                                                      | 331,212     |
| Paraguay                                                                                                                     | 406,752     |
| Cosmopolita (Holártica, Etiópica, Oriental y Neotropical)                                                                    | 125,600,000 |
| Holártica meridional, Norte de Neotropical y China suroriental, Neotropical, U.S.A. (Nuevo Méjico), e India (Tripura)        | 45,089,634  |
| Australianooriental: Micronesia (I. Marianas) y Vietnam                                                                      | 331,689     |
| Neotropical (Cuba y Ecuador)                                                                                                 | 393,381     |
| Paleártica meridional (Mediterránea y Asia centrooccidental) y Etiópica                                                      | 25,519,776  |
| Tropical: Etiópica (Nigeria), Oriental (Java) y Neotropical, y Subtropical: Paleártica meridional y Neártica (U.S.A.: Tejas) | 38,779,422  |
| Borneo                                                                                                                       | 751,936     |
| Pantropical y subtropical                                                                                                    | 81,935,554  |
| Alemania y Mongolia                                                                                                          | 1,914,672   |
| Holártica y Java                                                                                                             | 77,126,700  |
| Holártica (Neártica oriental y Europa meridional)                                                                            | 8,950,377   |
| Holártica (Europa, Este de Rusia asiática y U.S.A. oriental)                                                                 | 14,927,422  |
| Paleártica (Italia y Paleártica oriental), Oriental y Australiana (Australia y Nueva Zelanda)                                | 33,534,671  |
| Neotropical                                                                                                                  | 19,000,000  |
| Japón y Oriental (Taiwán y Vietnam)                                                                                          | 745,384     |
| Paleártica e India (Sikkim)                                                                                                  | 54,107,096  |
| Neotropical                                                                                                                  | 19,000,000  |



|                                                              |            |
|--------------------------------------------------------------|------------|
| Congo, Mediterránea oriental y Java                          | 3,166,655  |
| Oriental y Brasil                                            | 15,858,140 |
| Paleártica (Paleártica occidental y Este de Rusia asiática). | 24,683,049 |
| Paleártica meridional (Mediterránea y Asia centrooccidental) | 3,419,776  |
| U.S.A. oriental                                              | 1,647,422  |
| Paleártica                                                   | 54,100,000 |
| Paleártica occidental                                        | 21,583,049 |
| Paleártica occidental                                        | 21,583,049 |
| Europa y Mongolia                                            | 11,746,000 |
| China suroriental                                            | 1,837,107  |
| Neotropical (Chile y Ecuador)                                | 1,027,373  |
| Paleártica occidental y Etiópica: Tanzania e I. Santa Helena | 22,528,259 |
| Paleártica                                                   | 54,100,000 |
| Europa                                                       | 10,180,000 |
| Australiana (Nueva Guinea) y Oriental (Filipinas y Vietnam)  | 1,415,382  |
| Holártica                                                    | 77,000,000 |
| Borealpina                                                   | 78,249,340 |
| Paleártica y tropical: Vietnam y Panama                      | 54,555,071 |
| Holártica y África oriental                                  | 56,030,512 |
| Vietnam                                                      | 331,212    |
| Vietnam                                                      | 331,212    |
| Vietnam                                                      | 331,212    |
| Vietnam                                                      | 331,212    |
| Europa centromeridional                                      | 294,597    |
| Vietnam                                                      | 331,212    |
| Sumatra                                                      | 473,481    |
| Península Malaya                                             | 242,364    |
| Java                                                         | 1,267      |
| Neotropical                                                  | 19,000,000 |
| Borealpina: Euroatlántica, Cáucaso y Groenlandia             | 2,951,293  |
| Holártica                                                    | 77,000,000 |
| Oriental (Java y Borneo)                                     | 878,636    |
| Norte de Neotropical + Ecuador                               | 1,188,961  |

|                                                                                                                                            |             |
|--------------------------------------------------------------------------------------------------------------------------------------------|-------------|
| Ecuador                                                                                                                                    | 283,561     |
| Vietnam                                                                                                                                    | 331,212     |
| Cosmopolita (Paleártica, Neártica, Etiópica: Chad, Oriental, Australiana: Hawái, y Neotropical)                                            | 104,775,825 |
| Australia, Pantropical (excepto Etiópica) y Paleártica oriental meridional                                                                 | 32,290,167  |
| Java                                                                                                                                       | 126,700     |
| Holártica y China suroriental                                                                                                              | 78,837,107  |
| Holártica, Oriental y Neotropical                                                                                                          | 103,500,000 |
| Pantropical (y subtropical): Oriental, Japón, Australiana: I. Tonga, Neotropical: Brasil, y Etiópica: Congo y Madagascar                   | 19,163,263  |
| Oriental                                                                                                                                   | 7,500,000   |
| Nueva Guinea y Vietnam                                                                                                                     | 1,117,212   |
| Borneo                                                                                                                                     | 751,936     |
| Holártica (Neártica oriental y Cáucaso) y Méjico                                                                                           | 10,005,883  |
| Europa centromeridional                                                                                                                    | 294,507     |
| Bali                                                                                                                                       | 5,780       |
| Java                                                                                                                                       | 126,700     |
| India (Tripura) y Neotropical                                                                                                              | 19,010,492  |
| Paleártica centromeridional                                                                                                                | 6,011,111   |
| Holártica y China suroriental                                                                                                              | 78,837,108  |
| Semicosmopolita: Paleártica, Norte de Oriental, Etiópica (Sudáfrica y Etiopía) y Argentina                                                 | 63,121,316  |
| Mediterránea oriental + Canarias                                                                                                           | 702,589     |
| Holártica (Europa centromeridional, Paquistán y Canadá)                                                                                    | 10,184,109  |
| Paleártica                                                                                                                                 | 54,100,000  |
| Holártica (Paleártica, y U.S.A.: Alaska y Virginia)                                                                                        | 55,928,639  |
| Europa centromeridional                                                                                                                    | 294,507     |
| Paleártica, y Etiopía                                                                                                                      | 55,100,000  |
| Holártica y Norte de Oriental, Este de Paleártica oriental                                                                                 | 87,081,267  |
| Bolivia                                                                                                                                    | 1,083,301   |
| Oriental (Tailandia y Vietnam)                                                                                                             | 844,327     |
| Paleártica (Paleártica occidental, y Este de Paleártica oriental) y Neotropical (Argentina)                                                | 30,330,851  |
| Holártica, Costa Rica y Vietnam                                                                                                            | 77,382,312  |
| Holártica (Paleártica y Neártica nororiental)                                                                                              | 56,266,086  |
| Semicosmopolita (Paleártica occidental, Mongolia, U.S.A., I. Seychelles, Hawái, Argentina, India: Kerala, y Antártica: I. Georgia del Sur) | 36,178,664  |

|                                                                    |            |
|--------------------------------------------------------------------|------------|
| Oriental (Sumatra y Filipinas)                                     | 771,651    |
| Sumatra                                                            | 473,481    |
| Australia y Sumatra                                                | 8,155,781  |
| Sumatra                                                            | 473,481    |
| Paleártica centromeridional                                        | 6,011,111  |
| Java                                                               | 1,267      |
| Vietnam                                                            | 331,212    |
| Oriental y Japón                                                   | 7,877,975  |
| Sumatra                                                            | 473,481    |
| U.S.A. centrooriental                                              | 2,870,721  |
| Oriental (Vietnam y Filipinas)                                     | 629,291    |
| Paleártica y Vietnam                                               | 54,431,212 |
| Oriental (Vietnam y Noreste de India)                              | 593,442    |
| Sumatra                                                            | 473,481    |
| Ecuador                                                            | 283,561    |
| Vietnam                                                            | 331,212    |
| Vietnam                                                            | 331,212    |
| Oriental (Vietnam y Camboya)                                       | 512,247    |
| Oriental (Borneo y Sumatra)                                        | 1,225,417  |
| Sumatra                                                            | 473,481    |
| Oriental (Borneo y Vietnam)                                        | 1,083,148  |
| Oriental (Vietnam y Nepal)                                         | 478,728    |
| Borneo                                                             | 751,936    |
| Semicosmopolita (Holártica, Norte de Oriental, Australia y Panamá) | 88,827,873 |
| Vietnam                                                            | 331,212    |
| Brasil                                                             | 8,358,140  |
| Neotropical (Ecuador y Perú)                                       | 1,563,557  |
| Vietnam                                                            | 331,212    |
| Neártica septentrional                                             | 11,704,690 |
| Oriental, Mediterránea oriental y Iran                             | 9,726,692  |
| Paleártica occidental                                              | 21,583,050 |
| Paleártica, Oriental y Méjico                                      | 63,572,550 |
| Holártica                                                          | 77,000,000 |

|                                                                                                                                    |             |
|------------------------------------------------------------------------------------------------------------------------------------|-------------|
| Ecuador                                                                                                                            | 283,561     |
| Subtropical: Paleártica meridional (Mediterránea y Asia centrooccidental) y tropical: Senegal y Neotropical (I. Galápagos y Chile) | 4,364,128   |
| Mediterránea                                                                                                                       | 2,085,292   |
| Semicosmopolita (Paleártica, U.S.A. (Nuevo Méjico), Oriental: Bali, y Neotropical                                                  | 73,420,695  |
| Oriental y Australiana (Nuevas Hébridás)                                                                                           | 7,512,190   |
| U.S.A. oriental                                                                                                                    | 2,276,528   |
| Holártica, China suroriental y Panamá                                                                                              | 78,912,525  |
| Oriental (Tailandia y Vietnam)                                                                                                     | 844,327     |
| Holártica (Europa, Paleártica oriental y U.S.A.: Virginia), India (Sikkim) e I. Seychelles.                                        | 18,151,669  |
| Holártica e I. Seychelles                                                                                                          | 77,000,455  |
| Borealpina                                                                                                                         | 78,249,340  |
| Vietnam                                                                                                                            | 331,212     |
| Holártica (Europa y Neártica septentrional)                                                                                        | 21,884,690  |
| Paleártica                                                                                                                         | 54,100,000  |
| Neotropical                                                                                                                        | 19,000,000  |
| Pantropical (excepto Australiana) y Paleártica meridional                                                                          | 58,933,333  |
| Neotropical                                                                                                                        | 19,000,000  |
| Paleotropical y Paleártica meridional                                                                                              | 47,633,333  |
| Pantropical y Subtropical                                                                                                          | 81,935,554  |
| Pantropical y subtropical                                                                                                          | 81,935,554  |
| Semicosmopolita: Holártica, Oriental (Filipinas y China suroriental) y Norte de Neotropical                                        | 80,040,678  |
| Mediterránea oriental                                                                                                              | 695,097     |
| Cosmopolita (excepto Antártica)                                                                                                    | 134,940,000 |
| Holártica, Noreste de Oriental y Nueva Zelanda.                                                                                    | 81,334,693  |
| Semicosmopolita: Holártica, Oriental, I. Seychelles y Méjico                                                                       | 86,473,005  |
| Oriental (Java y Vietnam)                                                                                                          | 457,912     |
| Oriental (Vietnam y Camboya)                                                                                                       | 512,247     |
| Ecuador                                                                                                                            | 283,561     |
| Oriental                                                                                                                           | 7,500,000   |
| Paleártica, Etiópica (Península Arábiga y Etiopía), Méjico y Vietnam                                                               | 60,641,262  |
| Paleártica occidental (excepto Norte), Paleártica oriental (Este de Paleártica oriental e Irán) y Vietnam                          | 19,896,140  |
| Mediterránea occidental                                                                                                            | 1,390,194   |
| Camerún                                                                                                                            | 472,710     |

|                                                                                                         |            |
|---------------------------------------------------------------------------------------------------------|------------|
| Tropical (Oriental, y Australiana: Islas del Pacífico) y Egipto                                         | 9,754,149  |
| Mediterránea y Méjico                                                                                   | 4,057,842  |
| Oriental (Java y Vietnam)                                                                               | 457,912    |
| Australia                                                                                               | 7,682,300  |
| Perú, Hawái, Malgache (I. Mauricio) y Japón                                                             | 1,676,636  |
| Pantropical, y Paleártica meridional.                                                                   | 45,637,644 |
| Pantropical y Subtropical                                                                               | 81,935,554 |
| Neotropical e India (Tripura)                                                                           | 19,010,492 |
| Paleártica (Europa central e Irán)                                                                      | 2,522,084  |
| Semicosmopolita (Holártica, India: Uttar Pradesh, Nueva Zelanda y Chile)                                | 78,249,277 |
| Holártica (Paleártica y Neártica septentrional)                                                         | 65,804,690 |
| Europa centromeridional                                                                                 | 294,507    |
| Etiópica, Polinesia (Tahití), Cuba y Vietnam                                                            | 22,542,076 |
| Paleártica: Paleártica occidental e Irán                                                                | 23,114,644 |
| Paleártica meridional (Mediterránea e Irán)                                                             | 3,616,887  |
| Europa centromeridional                                                                                 | 294,507    |
| Holártica (Paleártica occidental, Este de Paleártica oriental y U.S.A.)                                 | 37,420,835 |
| Holártica: Paleártica y Neártica (U.S.A.: Virginia)                                                     | 54,210,785 |
| Paleártica y Nepal.                                                                                     | 54,247,516 |
| Mediterránea occidental                                                                                 | 1,390,194  |
| Holártica (Paleártica y U.S.A.: Carolina del Norte), Neotropical (Méjico y Brasil) y Oriental (Vietnam) | 64,901,291 |
| Mediterránea                                                                                            | 2,085,292  |
| Neotropical                                                                                             | 19,000,000 |
| Holártica (Paleártica occidental, Asia centoccidental y Neártica) y Oriental (Vietnam y Nepal)          | 42,746,545 |
| Holártica (Paleártica y Canadá)                                                                         | 63,193,507 |
| Holártica (Paleártica y Neártica septentrional), India (Sikkim) y Nueva Zelanda                         | 66,076,323 |
| Paleártica                                                                                              | 54,100,000 |
| Holártica y U.S.A. (Florida)                                                                            | 77,170,304 |
| Paleártica occidental                                                                                   | 21,583,050 |
| Holártica (Paleártica y U.S.A.: Carolina del Norte) y China suroriental                                 | 56,076,497 |
| Semicosmopolita: Australiana, Neotropical (América austral y Méjico) y Antártica (I. Príncipe Eduardo)  | 27,515,595 |
| Neotropical (Argentina y Ecuador) y Antártica                                                           | 17,020,206 |
| Paleártica meridional                                                                                   | 18,033,333 |

|                                                                                                 |            |
|-------------------------------------------------------------------------------------------------|------------|
| Paleártica occidental                                                                           | 21,583,050 |
| Europa                                                                                          | 10,180,000 |
| Europa                                                                                          | 10,180,000 |
| Paleártica occidental (excepto Norte)                                                           | 18,033,333 |
| Este de Paleártica oriental                                                                     | 6,011,111  |
| Paleártica meridional (Europa central y Paleártica oriental meridional)                         | 7,001,600  |
| Holártica y China suroriental                                                                   | 78,837,108 |
| Semicosmopolita: Paleártica, Groenlandia, Oriental (Filipinas e India: Tripura) y Australia     | 62,090,962 |
| Holártica y China suroriental                                                                   | 78,837,108 |
| Paleártica (Europa occidental e Irán)                                                           | 2,619,596  |
| Mediterránea occidental                                                                         | 1,390,195  |
| Vietnam                                                                                         | 331,212    |
| Ecuador                                                                                         | 283,561    |
| Pantropical (excepto Etiópica) y Paleártica meridional                                          | 54,713,333 |
| Neotropical austral                                                                             | 5,067,041  |
| Japón y Vietnam                                                                                 | 709,187    |
| Pantropical y subtropical                                                                       | 81,935,554 |
| Neotropical                                                                                     | 19,000,000 |
| Norte de India                                                                                  | 1,421,000  |
| Oriental (Indonesia y Vietnam) y Australiana (Nuevas Hébridas [Vanuatu])                        | 9,935,781  |
| Polinesia (Tahití) y Oriental                                                                   | 7,501,044  |
| Holártica y Neotropical                                                                         | 96,000,000 |
| Holártica y Neotropical                                                                         | 96,000,000 |
| Pantropical y subtropical                                                                       | 81,935,554 |
| Mediterránea y Perú                                                                             | 3,365,288  |
| Paleártica, Groenlandia y Australiana (Nueva Zelanda y Hawái)                                   | 56,547,348 |
| Oriental                                                                                        | 7,500,000  |
| Java y Este de Paleártica oriental                                                              | 6,137,811  |
| Borealpina (Paleártica occidental, Paleártica oriental: excepto Este, y Neártica septentrional) | 45,309,962 |
| Java, China suroriental y Melanesia (I. Fiji)                                                   | 1,982,081  |
| Tropical (Neotropical, Etiópica: Ghana, y Oriental: Filipinas)                                  | 19,525,703 |
| Oriental                                                                                        | 7,500,000  |
| Tropical (Etiópica: Malgache, Oriental: Java, y Australiana: Islas del Pacífico)                | 1,960,940  |

|                                                                                                             |             |
|-------------------------------------------------------------------------------------------------------------|-------------|
| Paleártica meridional y Noreste de India                                                                    | 19,454,333  |
| Paleártica                                                                                                  | 54,100,000  |
| Semicosmopolita: Holártica, Etiópica (Sudáfrica) y Norte de Neotropical                                     | 79,126,437  |
| Mediterránea oriental                                                                                       | 695,097     |
| Holártica (Paleártica occidental, Oeste de Siberia y U.S.A.)                                                | 33,909,724  |
| Europa centromeridional                                                                                     | 294,507     |
| Holártica (Paleártica, y U.S.A.: Virginia)                                                                  | 54,210,785  |
| Mediterránea occidental                                                                                     | 1,390,194   |
| Paleártica                                                                                                  | 54,100,000  |
| Cosmopolita                                                                                                 | 148,940,000 |
| Neotropical, Oriental (Filipinas y Vietnam) y Japón                                                         | 20,007,357  |
| Oriental y Este de Paleártica oriental                                                                      | 13,511,111  |
| Neotropical                                                                                                 | 19,000,000  |
| Semicosmopolita (Paleártica, Neártica oriental, Oriental, Australiana: Hawái, y Neotropical: Centroamérica) | 69,771,834  |
| Pantropical, Japón y "Polonia"                                                                              | 27,982,286  |
| Mediterránea occidental                                                                                     | 1,390,194   |
| Mediterránea oriental                                                                                       | 695,097     |
| Mediterránea occidental                                                                                     | 1,390,194   |
| Paleártica centromeridional                                                                                 | 6,011,111   |
| Vietnam                                                                                                     | 331,212     |
| Australiana (Indonesia: Lombok)                                                                             | 4,725       |
| Japón y Vietnam                                                                                             | 709,187     |
| Paleártica, Etiopía y Neotropical                                                                           | 74,100,000  |
| Holártica y Norte de Neotropical                                                                            | 77,905,400  |
| Semicosmopolita (Borealpina, Australiana y Neotropical)                                                     | 104,949,340 |
| Neotropical                                                                                                 | 19,000,000  |
| Paleártica occidental, Paleártica oriental (excepto Este), U.S.A. y Neotropical (Venezuela y Cuba)          | 46,915,211  |
| Oriental (Vietnam y Camboya)                                                                                | 512,247     |
| Cosmopolita (excepto Neotropical y Antártica)                                                               | 115,940,000 |
| Holártica, Neotropical y China suroriental                                                                  | 97,837,108  |
| Neotropical                                                                                                 | 19,000,000  |
| Holártica e I. Santa Helena                                                                                 | 77,000,123  |
| Semicosmopolita (Holártica, Neotropical, Norte de Oriental, Nueva Zelanda, I. Santa Helena y Antártica)     | 114,334,816 |

|                                                                     |             |
|---------------------------------------------------------------------|-------------|
| Sureste de U.S.A., Vietnam y Hawái                                  | 1,852,192   |
| Neotropical y Nueva Zelanda; Nueva Guinea                           | 20,050,537  |
| Neotropical (Bolivia y Perú)                                        | 2,363,297   |
| Neotropical (Bolivia y Chile)                                       | 1,827,113   |
| Oriental (Indonesia), Australiana (Micronesia: I. Marianas) y Japón | 2,283,021   |
| Oriental (Vietnam y Camboya)                                        | 512,247     |
| Vietnam                                                             | 331,212     |
| Sumatra                                                             | 473,481     |
| Holártica                                                           | 77,000,000  |
| Holártica y Oriental                                                | 84,500,000  |
| Borneo                                                              | 751,936     |
| Oriental (Vietnam y Nepal)                                          | 478,728     |
| Vietnam                                                             | 331,212     |
| Vietnam                                                             | 331,212     |
| Vietnam                                                             | 331,212     |
| Neotropical                                                         | 19,000,000  |
| Paleártica occidental (excepto Norte), Mediterránea                 | 14,107,514  |
| Mediterránea occidental                                             | 1,390,194   |
| Cosmopolita (excepto Antártica), Paleártica                         | 134,940,000 |
| Holártica y Norte de Neotropical                                    | 77,905,400  |
| Holártica, Oriental (Himalaya) e I. Santa Helena., I. Azores        | 77,602,474  |
| Holártica                                                           | 77,000,000  |
| Vietnam                                                             | 331,212     |
| Holártica, Nepal, Nueva Zelanda y Méjico                            | 79,384,603  |
| U.S.A. (Carolina del Norte)                                         | 126,161     |
| Neotropical                                                         | 19,000,000  |
| Paleártica meridional                                               | 18,033,333  |
| Neotropical (Paraguay y Brasil)                                     | 8,764,892   |
| Neotropical (Paraguay y Pequeñas Antillas)                          | 420,640     |
| Java                                                                | 1,267       |
| U.S.A. (Nueva York)                                                 | 1,413       |
| Paleártica occidental                                               | 21,583,050  |



|                                                                                                                                               |             |
|-----------------------------------------------------------------------------------------------------------------------------------------------|-------------|
| Holártica: Paleártica (Paleártica occidental) y Neártica (U.S.A.: Nueva York), y Neotropical: Antillas (La Española: R. Dominicana) y Ecuador | 22,056,353  |
| Holártica (Paleártica occidental, Asia centrooccidental y Neártica oriental)                                                                  | 30,551,219  |
| Mediterránea                                                                                                                                  | 2,085,292   |
| Cosmopolita                                                                                                                                   | 148,940,000 |
| Holártica y Neotropical                                                                                                                       | 96,000,000  |
| Paleártica occidental, Este de Rusia asiática y Canadá                                                                                        | 24,683,050  |
| Holártica (Paleártica, Canadá y U.S.A)                                                                                                        | 73,020,182  |
| Mediterránea oriental                                                                                                                         | 695,097     |
| Paleártica meridional (Europa centromeridional y Este de Rusia oriental)                                                                      | 3,394,507   |
| Vietnam                                                                                                                                       | 331,212     |
| Mediterránea                                                                                                                                  | 2,085,292   |
| Oeste de Europa                                                                                                                               | 1,088,001   |
| Oriental                                                                                                                                      | 7,500,000   |
| Cáucaso                                                                                                                                       | 400         |
| Holártica (Paleártica y Neártica septentrional)                                                                                               | 65,804,690  |
| Holártica (Europa, Este de Rusia asiática y U.S.A.: Virginia)                                                                                 | 17,243,385  |
| Paleártica meridional y Norte de Oriental                                                                                                     | 22,103,489  |
| Vietnam                                                                                                                                       | 331,212     |
| Holártica (Paleártica y Neártica septentrional) y Etiopía & Paleártica meridional (Mediterránea y Asia centrooccidental)                      | 66,804,690  |
| Paleártica                                                                                                                                    | 54,100,000  |
| Holártica e India (Sikkim)                                                                                                                    | 77,007,096  |
| Holártica: Paleártica y U.S.A. (Nuevo Méjico)                                                                                                 | 54,414,915  |
| Paleártica y Norte de Oriental.                                                                                                               | 58,170,156  |
| Boreal: Paleártica occidental, Noroeste de Siberia y Groenlandia                                                                              | 20,988,351  |
| Oriental; Vietnam                                                                                                                             | 7,500,000   |
| Oriental                                                                                                                                      | 7,500,000   |
| Tailandia                                                                                                                                     | 513,115     |
| Oriental (Borneo y Vietnam)                                                                                                                   | 1,083,148   |
| Oriental (Vietnam y Nepal)                                                                                                                    | 478,728     |
| Oriental (Tailandia y Vietnam) y Japón                                                                                                        | 1,222,302   |
| Etiópica y subantártica (I. San Pablo y Amsterdam), Ghana                                                                                     | 22,327,594  |
| Neotropical                                                                                                                                   | 19,000,000  |

|                                                                                                        |             |
|--------------------------------------------------------------------------------------------------------|-------------|
| Neotropical, India y Australiana (Nueva Zelanda y Australia)                                           | 30,234,306  |
| Paleártica meridional (Mediterránea occidental e Irán)                                                 | 2,921,790   |
| Holártica y China suroriental, Japon                                                                   | 79,215,083  |
| Holártica (Paleártica: Europa centromeridional, Mongolia y Noreste de China, y Neártica septentrional) | 14,358,497  |
| Holártica y Java                                                                                       | 54,226,700  |
| Tropical (Etiópica, Oriental y Polinesia) y subtropical (Cáucaso y Paleártica oriental meridional)     | 36,305,111  |
| Vietnam                                                                                                | 331,212     |
| Paleártica meridional (Mediterránea e Irán) y Australia                                                | 11,299,187  |
| Oriental                                                                                               | 7,500,000   |
| Borneo y Congo                                                                                         | 3,096,794   |
| Chile                                                                                                  | 743,812     |
| Holártica e I. Santa Helena                                                                            | 54,100,123  |
| Neotropical (Perú y Brasil)                                                                            | 9,638,136   |
| Tropical (Neotropical y Oriental)                                                                      | 26,500,000  |
| Neotropical y Oriental (Borneo)                                                                        | 19,751,936  |
| Paleártica (Europa centromeridional e Irán)                                                            | 1,826,102   |
| Península Malaya                                                                                       | 242,364     |
| Semicosmopolita (Holártica, Etiópica y Neotropical)                                                    | 118,100,000 |
| Vietnam                                                                                                | 331,212     |
| Holártica, Oriental y Neotropical                                                                      | 103,500,000 |
| Paleártica occidental (excepto Norte)                                                                  | 12,022,222  |
| Holártica (Paleártica y U.S.A.: Nuevo Méjico) y Méjico                                                 | 56,194,140  |
| Mediterránea                                                                                           | 2,085,292   |
| Oriental                                                                                               | 7,500,000   |
| Polinesia y Oriental (Vietnam e India: Kerala)                                                         | 664,075     |
| Vietnam                                                                                                | 331,212     |
| Semicosmopolita (Holártica, Oriental: Vietnam y China suroriental, y Micronesia: I. Marianas)          | 13,568,834  |
| Borneo                                                                                                 | 751,936     |
| Vietnam                                                                                                | 331,212     |
| Java                                                                                                   | 1,267       |
| Holártica (Paleártica occidental y Neártica septentrional)                                             | 33,287,740  |
| Oriental                                                                                               | 7,500,000   |
| Islas del Pacífico y Sumatra                                                                           | 1,726,181   |

|                                                                                                                    |             |
|--------------------------------------------------------------------------------------------------------------------|-------------|
| Vietnam                                                                                                            | 331,212     |
| Vietnam                                                                                                            | 331,212     |
| Oriental (Vietnam y Filipinas)                                                                                     | 629,291     |
| Holártica (Paleártica y U.S.A.) y Sudáfrica                                                                        | 65,147,712  |
| Oriental (Filipinas y Sumatra)                                                                                     | 771,651     |
| Sumatra                                                                                                            | 473,481     |
| Borneo                                                                                                             | 751,936     |
| Vietnam                                                                                                            | 331,212     |
| Nueva Guinea y Oriental (Indonesia)                                                                                | 2,680,569   |
| Paleártica (Europa centromeridional y Suroeste de Siberia)                                                         | 1,069,353   |
| Neotropical                                                                                                        | 19,000,000  |
| Vietnam                                                                                                            | 331,212     |
| Vietnam                                                                                                            | 331,212     |
| Holártica y Nepal                                                                                                  | 21,730,566  |
| Europa                                                                                                             | 10,180,000  |
| Neotropical                                                                                                        | 19,000,000  |
| Holártica, I. Santa Helena, Nepal y Neotropical (Costa Rica y Bolivia)                                             | 78,282,000  |
| Mediterránea oriental e Irán                                                                                       | 2,226,692   |
| Paleártica (Paleártica occidental y Corea) y Ceilán (Sri Lanka)                                                    | 21,860,699  |
| Holártica, Norte de Neotropical y Borneo                                                                           | 78,657,336  |
| Holártica (Paleártica y U.S.A.: Michigan)                                                                          | 54,350,494  |
| Paleártica, Perú y Etiópica (I. Santa Helena e I. Reunión)                                                         | 55,382,623  |
| Holártica (Paleártica y Neártica) y Angola                                                                         | 78,246,700  |
| Holártica y Uruguay                                                                                                | 77,176,215  |
| Pantropical (excepto Etiópica) y Subtropical                                                                       | 72,927,999  |
| Mediterránea                                                                                                       | 2,085,292   |
| Paleártica (Europa centromeridional y Suroeste de Siberia)                                                         | 1,069,353   |
| Cosmopolita (excepto Australiana y Antártica)                                                                      | 127,240,000 |
| Holártica                                                                                                          | 10,180,000  |
| Japón y Oriental                                                                                                   | 7,877,975   |
| Paleártica meridional                                                                                              | 18,033,333  |
| Semicosmopolita (Holártica, Norte de Oriental, Australiana: Nueva Zelanda, Norte de Neotropical e I. Santa Helena) | 82,240,216  |
| Borealpina                                                                                                         | 78,249,340  |

|                                                                                                                                |             |
|--------------------------------------------------------------------------------------------------------------------------------|-------------|
| Ecuador                                                                                                                        | 283,561     |
| Holártica (Paleártica oriental y Neártica septentrional) y Noreste de Oriental                                                 | 32,837,293  |
| Holártica                                                                                                                      | 77,000,000  |
| Holártica, China suroriental y Neotropical (Argentina e I. Galápagos)                                                          | 81,581,808  |
| Paleártica                                                                                                                     | 54,100,000  |
| Paleártica y Nepal                                                                                                             | 54,247,516  |
| Oriental                                                                                                                       | 7,500,000   |
| Cosmopolita (excepto Antártica)                                                                                                | 134,940,000 |
| Vietnam                                                                                                                        | 331,212     |
| Vietnam                                                                                                                        | 331,212     |
| Semicosmopolita (Holártica, Etiópica: Senegal e I. Santa Helena, Oriental: Vietnam y China suroriental, y Hawái)               | 79,377,598  |
| Oriental e Irán                                                                                                                | 9,031,595   |
| Oriental, Paleártica oriental (Irán), Etiópica (Congo), Neotropical y Australiana (Nuevas Hébridias)                           | 38,088,643  |
| Argentina                                                                                                                      | 2,736,690   |
| Neotropical y Filipinas                                                                                                        | 19,298,170  |
| Polinesia (Tahití), Etiópica (Congo) y Vietnam                                                                                 | 2,677,114   |
| Holártica, Oriental: China suroriental e India (Bengala Occidental), Méjico y Hawái                                            | 80,915,035  |
| Oriental (Java y Vietnam)                                                                                                      | 457,911     |
| Vietnam                                                                                                                        | 331,212     |
| Semicosmopolita (Paleártica, Este de U.S.A., Oriental y Nueva Zelanda)                                                         | 56,011,960  |
| Europa y Mongolia                                                                                                              | 11,746,000  |
| Pantropical y subtropical                                                                                                      | 81,935,554  |
| Mediterránea                                                                                                                   | 2,085,292   |
| Holártica (Europa: excepto Norte, y U.S.A.: Carolina del Norte) y Java                                                         | 9,271,785   |
| Semicosmopolita: Holártica, China suroriental y Malgache (I. Mauricio)                                                         | 78,839,148  |
| Neotropical y Oriental                                                                                                         | 26,500,000  |
| Semicosmopolita (Paleártica, U.S.A.: California, Malgache, Oriental y Hawái)                                                   | 62,361,861  |
| Tropical y subtropical: Paleártica (Mediterránea e Irán), U.S.A. (Nuevo Méjico), Neotropical (Costa Rica) y Oriental (Vietnam) | 4,314,114   |
| Europa                                                                                                                         | 10,180,000  |
| Paleártica occidental (excepto Norte), Paleártica oriental (Este de Paleártica oriental e Irán) y Vietnam                      | 19,896,140  |
| Paleártica y Venezuela                                                                                                         | 55,012,050  |
| Mediterránea                                                                                                                   | 2,085,292   |
| Mediterránea                                                                                                                   | 2,085,292   |

|                                                                                                                  |             |
|------------------------------------------------------------------------------------------------------------------|-------------|
| Holártica: excepto Este de Paleártica oriental y Senegal                                                         | 71,181,419  |
| Perú                                                                                                             | 1,279,996   |
| Neotropical                                                                                                      | 19,000,000  |
| Ceilán (Sri Lanka)                                                                                               | 6,463       |
| Pantropical y Subtropical                                                                                        | 81,935,554  |
| Oriental (Península Malaya y China suroriental)                                                                  | 2,079,472   |
| Oriental (Borneo y Filipinas)                                                                                    | 1,050,106   |
| Semicosmopolita (Holártica y Pantropical: excepto Etiópica)                                                      | 95,596,756  |
| Islas del Pacífico                                                                                               | 1,252,700   |
| Mediterránea occidental                                                                                          | 1,390,194   |
| Vietnam                                                                                                          | 331,212     |
| Ecuador                                                                                                          | 283,561     |
| Ecuador                                                                                                          | 283,561     |
| Europa                                                                                                           | 10,180,000  |
| Paleártica meridional y Méjico                                                                                   | 20,005,883  |
| Neotropical e India                                                                                              | 22,287,469  |
| Neotropical                                                                                                      | 19,000,000  |
| Cosmopolita (Paleártica meridional, Neártica y Pantropical)                                                      | 89,533,333  |
| Oriental (Java y Vietnam)                                                                                        | 457,912     |
| Semicosmopolita (Holártica, Paleotropical y Neotropical: Argentina y Bolivia)                                    | 116,041,441 |
| Neotropical (Argentina e I. Galápagos)                                                                           | 2,744,700   |
| Neotropical y Bután                                                                                              | 19,038,394  |
| Tropical: Neotropical (Perú y Brasil), Oriental (Vietnam e India: Orissa) y Etiópica (Congo y Etiopía)           | 13,469,913  |
| Neotropical (Argentina e I. Galápagos)                                                                           | 2,745       |
| Oriental                                                                                                         | 7,500,000   |
| Cosmopolita (excepto Antártica)                                                                                  | 134,940,000 |
| Neotropical (Perú y Chile) y Vietnam                                                                             | 2,355,020   |
| Semicosmopolita (excepto Antártica y Neotropical)                                                                | 115,940,000 |
| Semicosmopolita (Paleártica, India y Australia)                                                                  | 65,069,769  |
| Semicosmopolita (Paleártica oriental meridional, China suroriental, Australia y Neotropical: Argentina y Panamá) | 18,342,626  |
| Neotropical                                                                                                      | 19,000,000  |
| Europa                                                                                                           | 10,180,000  |
| Holártica y Neotropical                                                                                          | 96,000,000  |

|                                                                                                                                                                                  |            |
|----------------------------------------------------------------------------------------------------------------------------------------------------------------------------------|------------|
| Neártica y Japón                                                                                                                                                                 | 23,277,975 |
| Borneo y Ecuador                                                                                                                                                                 | 1,035,497  |
| Holártica                                                                                                                                                                        | 77,000,000 |
| Holártica y Méjico                                                                                                                                                               | 78,972,550 |
| Península Malaya                                                                                                                                                                 | 242,364    |
| Neotropical (Perú e I. Galápagos)                                                                                                                                                | 1,288,006  |
| Méjico                                                                                                                                                                           | 1,972,550  |
| Pantropical: Oriental (China suroriental y Vietnam), Australiana (Australia y Polinesia), Neotropical y Etiópica (Kenia y Etiopía), y subtropical                                | 54,640,879 |
| Perú                                                                                                                                                                             | 1,279,996  |
| Paleártica (Europa, y Noroeste de Siberia)                                                                                                                                       | 10,917,700 |
| Paleártica occidental                                                                                                                                                            | 18,033,333 |
| Paleártica: Paleártica occidental (excepto Norte) e Irán                                                                                                                         | 13,553,817 |
| Paleártica e India (Cachemira)                                                                                                                                                   | 54,322,000 |
| Europa centrooccidental                                                                                                                                                          | 247,662    |
| Holártica (Paleártica occidental, Irán y U.S.A.) e I. Santa Helena                                                                                                               | 32,941,443 |
| Mediterránea oriental y Paleártica oriental meridional                                                                                                                           | 6,706,208  |
| Europa, Irán e India (Megalaya), Mediterránea oriental                                                                                                                           | 12,429,121 |
| Neotropical (Brasil y Ecuador)                                                                                                                                                   | 8,641,701  |
| Neotropical (Bolivia y Ecuador)                                                                                                                                                  | 1,366,862  |
| Argentina                                                                                                                                                                        | 2,736,690  |
| Ecuador                                                                                                                                                                          | 283,561    |
| Australiana (Polinesia: Tahití), Oriental (Vietnam e India: Bengala Occidental) y Neotropical (I. Galápagos)                                                                     | 429,018    |
| Borneo                                                                                                                                                                           | 751,936    |
| Pantropical (excepto Australiana) y Japón                                                                                                                                        | 41,277,975 |
| Paleártica (Europa y Paleártica oriental meridional)                                                                                                                             | 16,191,111 |
| Paleártica meridional (Europa centromeridional e Irán)                                                                                                                           | 1,826,102  |
| Paleártica occidental (excepto Norte)                                                                                                                                            | 12,022,222 |
| Holártica (Europa centrooccidental y Canadá)                                                                                                                                     | 9,341,129  |
| Holártica (Paleártica, y Canadá)                                                                                                                                                 | 63,193,507 |
| Holártica (Paleártica occidental, Este de Rusia asiática y Neártica).                                                                                                            | 31,655,933 |
| [Holártica y Argentina, Holártica (Paleártica y Canadá), Mediterránea, Paleártica, Holártica (Paleártica occidental, Este de Rusia asiática y Neártica)] = Holarctic + Argentina | 79,736,690 |

|                                                                                                                       |            |
|-----------------------------------------------------------------------------------------------------------------------|------------|
| Europa centromeridional e India (Tripura)                                                                             | 304,999    |
| Neotropical, Oriental y Holártica meridional (Paleártica meridional y U.S.A.: Luisiana)                               | 44,667,597 |
| Paleártica; Europa centromeridional                                                                                   | 54,100,000 |
| Neártica (U.S.A.: Carolina del Norte, y Canadá)                                                                       | 9,232,896  |
| India (Kerala)                                                                                                        | 38,863     |
| Holártica (U.S.A.: Carolina del Norte, y Este de Rusia asiática)                                                      | 7,091,989  |
| Paleártica (Europa y Oeste de Siberia) y Vietnam                                                                      | 12,226,196 |
| Semicosmopolita: Holártica (Neártica oriental, Europa y Este de Rusia asiática), El Salvador, Nueva Zelanda y Vietnam | 25,382,723 |
| Holártica                                                                                                             | 77,000,000 |
| Oriental (Indonesia y Vietnam)                                                                                        | 2,235,781  |
| Neotropical                                                                                                           | 19,000,000 |
| Vietnam                                                                                                               | 331,212    |
| Malgache (I. Mauricio)                                                                                                | 204        |
| Java                                                                                                                  | 1,267      |
| Bali                                                                                                                  | 578        |
| Nueva Guinea, Oriental y Brasil                                                                                       | 16,644,140 |
| Neotropical (Perú y Centroamérica)                                                                                    | 1,801,872  |
| Paleártica (Europa y Este de Rusia asiática)                                                                          | 17,132,600 |
| Semicosmopolita: Holártica, Oriental y Nueva Zelanda                                                                  | 84,764,537 |
| Pantropical y Japón                                                                                                   | 48,977,975 |
| Nueva Guinea                                                                                                          | 786,000    |
| Tropical (Neotropical: Perú y Panamá, Australiana, Etiopía e India: Bengala Occidental) y Subtropical                 | 9,144,165  |
| Oriental (Indonesia y Vietnam)                                                                                        | 2,235,781  |
| Perú y Brasil                                                                                                         | 9,638,136  |
| Este de Paleártica oriental y China suroriental                                                                       | 7,848,219  |
| Java                                                                                                                  | 1,267      |
| Borneo                                                                                                                | 751,936    |
| Borneo                                                                                                                | 751,936    |
| Oriental (Sumatra e India: Arunachal Pradesh)                                                                         | 557,224    |
| Holártica                                                                                                             | 77,000,000 |
| Vietnam y Méjico                                                                                                      | 2,303,762  |
| Tropical (Oriental y Neotropical) y Paleártica meridional                                                             | 44,533,333 |
| Oriental (Filipinas y Vietnam)                                                                                        | 626,382    |

|                                                                                                                                       |             |
|---------------------------------------------------------------------------------------------------------------------------------------|-------------|
| Oriental (Borneo y Vietnam)                                                                                                           | 1,083,148   |
| Paleártica                                                                                                                            | 54,100,000  |
| Semicosmopolita: Paleártica (Paleártica occidental, Irán y Japón), U.S.A. (Virginia), Oriental, I. Galápagos y Nueva Zelanda          | 31,375,952  |
| Cosmopolita                                                                                                                           | 148,940,000 |
| Cosmopolita                                                                                                                           | 148,940,000 |
| Mediterránea, Oriental: Filipinas y Ceilán [Sri Lanka], y Melanesia (I. Fiji)                                                         | 2,466,366   |
| Pantropical y subtropical (Paleártica meridional)                                                                                     | 6,663,333   |
| Neotropical                                                                                                                           | 19,000,000  |
| Paleártica meridional                                                                                                                 | 18,033,333  |
| Neotropical                                                                                                                           | 19,000,000  |
| Oriental (Indonesia) y Nueva Guinea                                                                                                   | 2,690,569   |
| Semicosmopolita (Holártica, Etiópica: I. Santa Helena, Australiana, Neotropical y Oriental: Vietnam)                                  | 104,031,335 |
| U.S.A                                                                                                                                 | 9,826,675   |
| Cosmopolita: Holártica, Oriental (China suroriental y Noreste de India), Etiopía y Neotropical                                        | 99,099,338  |
| Semicosmopolita: Paleártica meridional (Cáucaso y Sureste de Paleártica oriental), Oriental, Etiópica (Zambia) y Netropical (Ecuador) | 26,569,512  |
| Cáucaso                                                                                                                               | 400         |
| Perú                                                                                                                                  | 1,279,996   |
| Holártica: Paleártica y Canadá                                                                                                        | 63,193,507  |
| Holártica (Paleártica y U.S.A.: Virginia)                                                                                             | 54,100,000  |
| Paleártica occidental (menos frecuente en el Norte)                                                                                   | 21,583,049  |
| Borneo                                                                                                                                | 751,936     |
| Ruanda                                                                                                                                | 26,338      |
| Semicosmopolita: Holártica, Neotropical, I. Santa Helena y Australiana (Nueva Zelanda e Islas del Pacífico)                           | 103,700,123 |
| Paleártica (Europa meridional y Este de Rusia asiática)                                                                               | 4,417,044   |
| Vietnam                                                                                                                               | 331,212     |
| Oriental y Este de Paleártica oriental                                                                                                | 13,511,111  |
| Vietnam                                                                                                                               | 331,212     |
| Pantropical y subtropical                                                                                                             | 81,935,554  |
| África centrooriental                                                                                                                 | 4,350,015   |
| Holártica (Paleártica occidental, Paleártica oriental meridional, y U.S.A.: Míchigan) y Méjico                                        | 26,267,488  |
| Paleártica y China suroriental                                                                                                        | 55,937,108  |
| Colombia                                                                                                                              | 1,038,700   |



|                                                                                             |            |
|---------------------------------------------------------------------------------------------|------------|
| Neotropical, U.S.A. meridional y Oriental (Borneo y Vietnam)                                | 22,191,555 |
| Vietnam                                                                                     | 331,212    |
| Oriental y Este de Paleártica oriental                                                      | 13,511,111 |
| Holártica: Paleártica occidental, Paleártica oriental (I. Kuriles) y Neártica septentrional | 33,298,244 |
| Paleártica occidental, Este de Rusia asiática y Neotropical (Argentina y Perú)              | 29,002,619 |
| Europa meridional                                                                           | 1,317,044  |
| Nueva Guinea                                                                                | 786        |
| Oriental y Paleártica: Crimea y Corea                                                       | 7,739,863  |

s. Chapman and Hall, New York, USA, pp 8-99

3-373
