# Supplementary material for: “Jack‐of‐all‐trades” is parthenogenetic
Source: PubMed Central journal article supplement (PMC9219104; doi:10.1002/ece3.9036), 2022-06-23
Supplement: ECE3-12-e9036-s003.pdf [file ECE3-12-e9036-s003.pdf]

**Appendix, Table 3:** Oribatid mite species, their taxonomic affiliation, reproductive mode and geographic range (km<sup>2</sup>), their NCBI accession numbers and length of the 18S fragment used for the molecular phylogeny in this study. NCBI data were used to construct a solid family level molecular phylogeny based on all taxa listed in Appendix Table 2 to test for phylogenetic independence of geographic range among ori. Taxa kept for phylogenetic trait analysis (one species per monophyletic clade) are indicated by asterisks (\*). Species from NCBI may deviate from taxa used for our study, but represent the same genus or family.

| Oribatid mite species                                   | Oribatid mite species downloaded from NCBI, deviating from Table 2 | Taxon        |
|---------------------------------------------------------|--------------------------------------------------------------------|--------------|
| <i>Aphelacarus acarinus</i> (Berlese, 1910)             |                                                                    | Palaeosomata |
| <i>Ctenacarus aranaeola</i> (Grandjean, 1932)*          |                                                                    | Palaeosomata |
| <i>Palaeacarus hystricinus</i> Trägårdh, 1932*          |                                                                    | Palaeosomata |
|                                                         |                                                                    |              |
| <i>Brachychthonius berlesei</i> Willmann, 1928*         | <i>Brachychthonius bimaculatus</i> *                               | Enarthronota |
| <i>Liochthonius alpestris</i> (Forsslund, 1958)         | <i>Liochthonius</i> sp.                                            | Enarthronota |
| <i>Liochthonius neglectus</i> Moritz, 1976              |                                                                    | Enarthronota |
| <i>Liochthonius peduncularius</i> (Strenzke, 1951)      |                                                                    | Enarthronota |
| <i>Sellnickochthonius cricoides</i> (Weis-Fogh, 1948)   |                                                                    | Enarthronota |
| <i>Sellnickochthonius zelawaiensis</i> (Sellnick, 1928) |                                                                    | Enarthronota |
| <i>Cosmochthonius lanatus</i> (Michael, 1885)*          |                                                                    | Enarthronota |
| <i>Eniochthonius minutissimus</i> (Berlese, 1903)*      |                                                                    | Enarthronota |
| <i>Haplochthonius sanctaeluciae</i> Bernini, 1973*      | <i>Haplochthonius simplex</i> *                                    | Enarthronota |
| <i>Eohypochthonius salicifolius</i> Hammer, 1979*       | <i>Eohypochthonius gracilis</i> *                                  | Enarthronota |
| <i>Hypochthonius luteus</i> Oudemans, 1917              |                                                                    | Enarthronota |
| <i>Hypochthonius rufulus</i> C.L. Koch, 1835            |                                                                    | Enarthronota |
| <i>Malacoangelia remigera</i> Berlese, 1913             |                                                                    | Enarthronota |
| <i>Lohmannia hungarorum</i> Mahunka, 1980*              | <i>Lohmannia banksi</i> *                                          | Enarthronota |
| <i>Apoplophora cristata</i> Mahunka, 1991*              | <i>Apoplophora</i> sp. *                                           | Enarthronota |
| <i>Archoplophora rostralis</i> (Willmann, 1930)         |                                                                    | Enarthronota |
| <i>Mesoplophora leviseta</i> Hammer, 1979               | <i>Mesoplophora abscondita</i>                                     | Enarthronota |
| <i>Mesoplophora michaeliana</i> Berlese, 1904*          | <i>Mesoplophora cubana</i> *                                       | Enarthronota |
| <i>Pterochthonius angelus</i> (Berlese, 1910)*          |                                                                    | Enarthronota |
| <i>Sphaerochthonius splendidus</i> (Berlese, 1904)*     | <i>Sphaerochthonius</i> sp.*                                       | Enarthronota |
| <i>Gozmanyina majestus</i> (Marshall & Reeves, 1971)*   |                                                                    | Enarthronota |

|                                                     |                                    |               |
|-----------------------------------------------------|------------------------------------|---------------|
|                                                     |                                    |               |
| <i>Gehypochthonius rhadamanthus</i> Jacot, 1936*    | <i>Gehypochthonius urticinus</i> * | Parhyposomata |
|                                                     |                                    |               |
| <i>Epilohmannia minuta</i> Berlese, 1920*           | <i>Epilohmannia</i> sp.*           | Mixonomata    |
| <i>Eulohmannia ribagai</i> (Berlese, 1910)*         |                                    | Mixonomata    |
| <i>Acrotritia duplicata</i> (Grandjean, 1953)*      | <i>Rhysotritia duplicata</i> *     | Mixonomata    |
| <i>Nehypochthonius porosus</i> Norton & Metz, 1980* |                                    | Mixonomata    |
| <i>Oribotritia berlesei</i> (Michael, 1898)*        | <i>Indotritia krakatauensis</i> *  | Mixonomata    |
| <i>Atropacarus striculus</i> (Koch, 1835)           |                                    | Mixonomata    |
| <i>Phthiracarus bryobius</i> Jacot, 1930*           | <i>Phthiracarus</i> sp.*           | Mixonomata    |
| <i>Steganacarus applicatus</i> (Sellnick, 1920)     |                                    | Mixonomata    |
| <i>Steganacarus magnus</i> (Nicolet, 1855)          |                                    | Mixonomata    |
|                                                     |                                    |               |
| <i>Camisia biurus</i> (C.L. Koch, 1839)             |                                    | Desmonomata   |
| <i>Camisia horrida</i> (Hermann, 1804)              |                                    | Desmonomata   |
| <i>Camisia invenusta</i> (Michael, 1888)            |                                    | Desmonomata   |
| <i>Camisia spinifer</i> (C.L. Koch, 1835)           |                                    | Desmonomata   |
| <i>Heminothrus targionii</i> (Berlese, 1885)        | <i>Heminothrus paolianus</i>       | Desmonomata   |
| <i>Platynothrus peltifer</i> (C.L. Koch, 1839)*     |                                    | Desmonomata   |
| <i>Hermannia gibba</i> (C.L. Koch, 1839)*           |                                    | Desmonomata   |
| <i>Malaconothrus gracilis</i> Hammen, 1952          |                                    | Desmonomata   |
| <i>Malaconothrus monodactylus</i> (Michael, 1888)*  |                                    | Desmonomata   |
| <i>Cyrthermannia florens</i> Balogh & Mahunka, 1980 |                                    | Desmonomata   |
| <i>Nanhermannia coronata</i> Berlese, 1913*         |                                    | Desmonomata   |
| <i>Nanhermannia elegantissima</i> Hammer, 1958      |                                    | Desmonomata   |
| <i>Nanhermannia nana</i> (Nicolet, 1855)            |                                    | Desmonomata   |
| <i>Nothrus borussicus</i> Sellnick, 1928            |                                    | Desmonomata   |
| <i>Nothrus silvestris</i> Nicolet, 1855             |                                    | Desmonomata   |
| <i>Nothrus silvicus</i> Jacot, 1937                 |                                    | Desmonomata   |
| <i>Nothrus willmanni</i> Mahunka, 1983*             |                                    | Desmonomata   |
| <i>Afronothrus incisivus</i> Wallwork, 1961         |                                    | Desmonomata   |
| <i>Allonothrus russeolus</i> Wallwork, 1960         |                                    | Desmonomata   |
| <i>Archezogozetes longisetosus</i> Aoki, 1965       |                                    | Desmonomata   |

|                                                         |                                        |              |
|---------------------------------------------------------|----------------------------------------|--------------|
| <i>Mucronothrus nasalis</i> (Willmann, 1929)            |                                        | Desmonomata  |
| <i>Trhypochthoniellus longisetosus</i> (Berlese, 1904)* | <i>Trhypochthoniellus crassus</i> *    | Desmonomata  |
| <i>Trhypochthonius americanus</i> (Ewing, 1908)         |                                        | Desmonomata  |
| <i>Trhypochthonius tectorum</i> (Berlese, 1896)         |                                        | Desmonomata  |
|                                                         |                                        |              |
| <i>Achipteria coleoptrata</i> (Linné, 1758)*            |                                        | Brachypylina |
| <i>Tecteremaeus incompletus</i> Mahunka, 1988*          |                                        | Brachypylina |
| <i>Caleremaeus monilipes</i> (Michael, 1882)*           |                                        | Brachypylina |
| <i>Epieremulus granulatus</i> (Balogh & Mahunka, 1979)* |                                        | Brachypylina |
| <i>Carabodes coriaceus</i> C.L. Koch, 1835              |                                        | Brachypylina |
| <i>Carabodes labyrinthicus</i> (Michael, 1879)*         |                                        | Brachypylina |
| <i>Carabodes subarcticus</i> Trägårdh, 1902             |                                        | Brachypylina |
| <i>Odontocepheus elongatus</i> (Michael, 1879)*         |                                        | Brachypylina |
| <i>Cepheus dentatus</i> (Michael, 1888)                 |                                        | Brachypylina |
| <i>Cepheus latus</i> C.L. Koch, 1835*                   |                                        | Brachypylina |
| <i>Ceratoppia bipilis</i> (Hermann, 1804)*              |                                        | Brachypylina |
| <i>Edwardzetes edwardsi</i> (Nicolet, 1855)*            |                                        | Brachypylina |
| <i>Euzetes globulus</i> (Nicolet, 1855)*                |                                        | Brachypylina |
| <i>Oromurcia bicuspidata</i> Thor, 1930*                | <i>Oromurcia sudetica</i> *            | Brachypylina |
| <i>Trichoribates incisellus</i> (Kramer, 1897)          | <i>Trichoribates trimaculatus</i>      | Brachypylina |
| <i>Chamobates pusillus</i> (Berlese, 1895)              |                                        | Brachypylina |
| <i>Chamobates subglobulus</i> (Oudemans, 1900)*         |                                        | Brachypylina |
| <i>Chamobates voigtsii</i> (Oudemans, 1902)             |                                        | Brachypylina |
| <i>Cymbaeremaeus cymba</i> (Nicolet, 1855)*             |                                        | Brachypylina |
| <i>Scapheremaeus bicornutus</i> Hammer, 1971*           | <i>Scapheremaeus nakanoshimensis</i> * | Brachypylina |
| <i>Scapheremaeus foveolatus</i> Mahunka, 1987           | <i>Scapheremaeus palustris</i>         | Brachypylina |
| <i>Damaeus clavipes</i> (Hermann, 1804)*                |                                        | Brachypylina |
| <i>Damaeus flagelloides</i> (Norton, 1979)              |                                        | Brachypylina |
| <i>Dameobelba minutissima</i> (Sellnick, 1920)          |                                        | Brachypylina |
| <i>Metabelba papillipes</i> (Nicolet, 1855)             |                                        | Brachypylina |
| <i>Beckiella capitulum</i> Balogh & Mahunka, 1978*      |                                        | Brachypylina |
| <i>Eueremaeus oblongus</i> (Koch, 1835)*                |                                        | Brachypylina |
| <i>Eremaozetes lineatus</i> Mahunka, 1985*              | <i>Eremaozetes</i> sp.*                | Brachypylina |

|                                                          |                                   |              |
|----------------------------------------------------------|-----------------------------------|--------------|
| <i>Acrogalumna longipluma</i> (Berlese, 1904)            |                                   | Brachypylina |
| <i>Galumna lanceata</i> (Oudemans, 1900)*                |                                   | Brachypylina |
| <i>Pilogalumna crassiclava</i> (Berlese, 1914)           | <i>Pilogalumna rosauraruizae</i>  | Brachypylina |
| <i>Gymnodamaeus bicostatus</i> (C.L. Koch, 1835)*        |                                   | Brachypylina |
| <i>Peloribates europaeus</i> Willmann, 1953*             | <i>Peloribates acutus</i> *       | Brachypylina |
| <i>Rostrozetes ovulum</i> (Berlese, 1908)*               |                                   | Brachypylina |
| <i>Rostrozetes shibai</i> Aoki, 1976*                    | <i>Rostrozetes nebulosus</i> *    | Brachypylina |
| <i>Hemileius perforatoides</i> (Hammer, 1979)            | <i>Hemileius singularis</i>       | Brachypylina |
| <i>Ampullobates ecuadoriensis</i> Ermilov et al., 2013*  |                                   | Brachypylina |
| <i>Hermannobates monstruosus</i> Hammer, 1961            |                                   | Brachypylina |
| <i>Adoristes ovatus</i> (C.L. Koch, 1839)                |                                   | Brachypylina |
| <i>Dorycranosus acutus</i> (Pschorn-Walcher, 1951)*      | <i>Liacarus coracinus</i> *       | Brachypylina |
| <i>Liebstadia humerata</i> Sellnick, 1928*               |                                   | Brachypylina |
| <i>Microtegeus similis</i> Balogh & Mahunka, 1980*       |                                   | Brachypylina |
| <i>Unguizetes cattienensis</i> Ermilov & Anichkin, 2011* | <i>Unguizetes incertus</i> *      | Brachypylina |
| <i>Poroliodes farinosus</i> (C.L. Koch, 1840)*           |                                   | Brachypylina |
| <i>Berniniella sigma</i> (Strenzke, 1951)                | <i>Oppiella splendens</i>         | Brachypylina |
| <i>Dissorhina ornata</i> (Oudemans, 1900)                |                                   | Brachypylina |
| <i>Gittella variabilis</i> Ermilov et al., 2013*         |                                   | Brachypylina |
| <i>Oppia nitens</i> C.L. Koch, 1836                      | <i>Rhinoppia nasuta</i>           | Brachypylina |
| <i>Oppiella nova</i> (Oudemans, 1902)*                   |                                   | Brachypylina |
| <i>Joelia fiorii</i> (Coggi, 1898)*                      | <i>Paralamellobates misella</i> * | Brachypylina |
| <i>Oribatula interrupta</i> Willmann, 1939               | <i>Oribatula sakamorii</i>        | Brachypylina |
| <i>Oribatula tibialis</i> (Nicolet, 1855)                |                                   | Brachypylina |
| <i>Phauloppia lucorum</i> (C.L. Koch, 1841)*             |                                   | Brachypylina |
| <i>Oribella pectinata</i> (Michael, 1885)*               | <i>Pantelozetes paolii</i> *      | Brachypylina |
| <i>Eupelops acromios</i> (Hermann, 1804)                 |                                   | Brachypylina |
| <i>Eupelops plicatus</i> (C.L. Koch, 1835)*              |                                   | Brachypylina |
| <i>Pheroliodes intermedius</i> (Hammer, 1961)*           | <i>Pheroliodes</i> sp.*           | Brachypylina |
| <i>Solenozetes carinatus</i> (Hammer, 1961)*             |                                   | Brachypylina |
| <i>Protoribates capucinus</i> Berlese, 1908*             | <i>Protoribates hakonensis</i> *  | Brachypylina |
| <i>Punctoribates punctum</i> (C.L. Koch, 1839)*          |                                   | Brachypylina |
| <i>Rhynchoribates mirus</i> Beck, 1961*                  |                                   | Brachypylina |

|                                                          |                                 |               |
|----------------------------------------------------------|---------------------------------|---------------|
| <i>Scheloribates ascendens</i> Weigmann & Wunderle, 1990 |                                 | Brachypylina  |
| <i>Scheloribates initialis</i> (Berlese, 1908)*          | <i>Hemileius microclava</i> *   | Brachypylina  |
| <i>Scheloribates pallidulus</i> (C.L. Koch, 1841)*       |                                 | Brachypylina  |
| <i>Scutovertex sculptus</i> Michael, 1879*               |                                 | Brachypylina  |
| <i>Tectocephus minor</i> Berlese, 1903*                  |                                 | Brachypylina  |
| <i>Tectocephus velatus</i> Michael, 1880                 |                                 | Brachypylina  |
| <i>Dolicheremaeus dorni</i> (Balogh, 1937)*              |                                 | Brachypylina  |
| <i>Plenotocephus neotropicus</i> Ermilov et al., 2013*   |                                 | Brachypylina  |
| <i>Xenillus clypeator</i> Robineau-Desvoidy, 1839*       | <i>Xenillus discrepans</i> *    | Brachypylina  |
| <i>Xenillus tegeocranus</i> (Hermann, 1804)              |                                 | Brachypylina  |
| <i>Zetorchestes novaguineanus</i> Krisper, 1987          | <i>Zetorchestes micronychus</i> | Brachypylina  |
| <b>outgroups</b>                                         |                                 |               |
| <i>Demodex brevis</i>                                    |                                 | Cheyletoidea  |
| <i>Balaustium</i> sp.                                    |                                 | Erythraeoidea |
| <i>Ameroseius plumosus</i>                               |                                 | Gamasina      |
| <i>Polyaspis</i> sp.                                     |                                 | Uropodina     |
| <i>Sternothyruus braueri</i>                             |                                 | Holothyrida   |
| <i>Opilioacarus texanus</i>                              |                                 | Opilioacarida |
| Opilioacarid SJD-2001                                    |                                 | Opilioacarida |
| <i>Neocarus bajacalifornicus chamelaensis</i>            |                                 | Opilioacarida |

batid mite species.

| <b>Family</b>      | <b>reproductive mode</b> | <b>area (km<sup>2</sup>)</b> | <b>NCBI no.</b> | <b>18S (bp)</b> |
|--------------------|--------------------------|------------------------------|-----------------|-----------------|
| Aphelacaridae      | sexual                   | 118,336,000                  | DQ648879        | 505             |
| Ctenacaridae       | sexual                   | 81,935,554                   | EU433991        | 1937            |
| Palaeacaridae      | parthenogenetic          | 79,215,083                   | EF204472        | 1704            |
|                    |                          |                              |                 |                 |
| Brachychthoniidae  | parthenogenetic          | 77,000,000                   | OL839311        | 1945            |
| Brachychthoniidae  | parthenogenetic          | 54,100,000                   | JQ000035        | 1859            |
| Brachychthoniidae  | parthenogenetic          | 21,583,050                   | OL839308        | 1931            |
| Brachychthoniidae  | parthenogenetic          | 10,180,000                   | OL839310        | 1901            |
| Brachychthoniidae  | parthenogenetic          | 65,069,769                   | OL839309        | 1945            |
| Brachychthoniidae  | parthenogenetic          | 77,000,000                   | MH198174        | 1725            |
| Cosmochthoniidae   | sexual                   | 125,600,000                  | JN585919        | 2132            |
| Eniochthoniidae    | parthenogenetic          | 134,940,000                  | KR081609        | 1842            |
| Haplochthoniidae   | parthenogenetic          | 4,364,128                    | KY922210        | 2158            |
| Hypochthoniidae    | parthenogenetic          | 878,636                      | EF203777        | 1850            |
| Hypochthoniidae    | parthenogenetic          | 81,334,693                   | EU152475        | 1707            |
| Hypochthoniidae    | parthenogenetic          | 86,473,005                   | KR081618        | 1813            |
| Hypochthoniidae    | parthenogenetic          | 81,935,554                   | JN585911        | 1651            |
| Lohmanniidae       | parthenogenetic          | 1,390,195                    | AF022036        | 1759            |
| Mesoplophoridae    | sexual                   | 242,364                      | JN585917        | 1779            |
| Mesoplophoridae    | parthenogenetic          | 37,914,527                   | JN585918        | 1826            |
| Mesoplophoridae    | sexual                   | 1,960,940                    | JN585912        | 1,797           |
| Mesoplophoridae    | sexual                   | 19,454,333                   | EU432217        | 1835            |
| Pterochthoniidae   | parthenogenetic          | 80,915,035                   | EU432214        | 1713            |
| Sphaerochthoniidae | sexual                   | 54,640,879                   | JN585916        | 2142            |
| Trichthoniidae     | parthenogenetic          | 11,704,690                   | EU433993        | 1800            |

|                   |                 |             |          |      |
|-------------------|-----------------|-------------|----------|------|
|                   |                 |             |          |      |
| Gehypochthoniidae | parthenogenetic | 88,827,873  | EU433994 | 1825 |
|                   |                 |             |          |      |
| Epilohmanniidae   | parthenogenetic | 32,290,167  | EU432213 | 1755 |
| Eulohmanniidae    | parthenogenetic | 78,837,108  | EU432211 | 1635 |
| Euphthiracaridae  | parthenogenetic | 54,478,728  | EF091417 | 1797 |
| Nehypochthoniidae | parthenogenetic | 1,852,192   | EF081308 | 1741 |
| Oribotritiidae    | sexual          | 58,170,156  | JN585920 | 1625 |
| Phthiracaridae    | parthenogenetic | 92,721,876  | EF091416 | 1742 |
| Phthiracaridae    | sexual          | 78,282,000  | KR081629 | 1824 |
| Phthiracaridae    | sexual          | 1,390,195   | GQ864301 | 1672 |
| Phthiracaridae    | sexual          | 32,941,443  | AF022040 | 1736 |
|                   |                 |             |          |      |
| Camisiidae        | parthenogenetic | 78,837,108  | EF081302 | 1741 |
| Camisiidae        | parthenogenetic | 82,975,556  | EU432207 | 1624 |
| Camisiidae        | parthenogenetic | 82,975,556  | EU432208 | 1624 |
| Camisiidae        | parthenogenetic | 89,503,713  | EF091420 | 1741 |
| Camisiidae        | parthenogenetic | 78,912,525  | EF091423 | 1741 |
| Camisiidae        | parthenogenetic | 82,240,216  | EF091422 | 1795 |
| Hermanniidae      | sexual          | 77,000,455  | EF091426 | 1739 |
| Malaconothridae   | parthenogenetic | 96,000,000  | JQ000044 | 1753 |
| Malaconothridae   | parthenogenetic | 96,000,000  | KR081621 | 1813 |
| Nanhermanniidae   | parthenogenetic | 19,000,000  | KR081606 | 1823 |
| Nanhermanniidae   | parthenogenetic | 97,837,108  | EF091421 | 1741 |
| Nanhermanniidae   | parthenogenetic | 19,000,000  | KR081623 | 1717 |
| Nanhermanniidae   | parthenogenetic | 114,334,816 | OL839307 | 1767 |
| Nothridae         | parthenogenetic | 77,905,400  | KY922216 | 1776 |
| Nothridae         | parthenogenetic | 79,384,603  | EF091425 | 1766 |
| Nothridae         | parthenogenetic | 126,161     | EF204473 | 1700 |
| Nothridae         | parthenogenetic | 19,000,000  | KR081625 | 1808 |
| Trhypochthoniidae | parthenogenetic | 27,604,311  | JQ000045 | 1753 |
| Trhypochthoniidae | parthenogenetic | 22,477,975  | AF022025 | 1812 |
| Trhypochthoniidae | parthenogenetic | 26,500,000  | HQ661379 | 1700 |

|                   |                 |             |          |      |
|-------------------|-----------------|-------------|----------|------|
| Trhypochthoniidae | parthenogenetic | 104,949,340 | EF081299 | 1741 |
| Trhypochthoniidae | parthenogenetic | 104,031,335 | EF081300 | 1741 |
| Trhypochthoniidae | parthenogenetic | 9,826,675   | JQ000046 | 1776 |
| Trhypochthoniidae | parthenogenetic | 99,099,338  | AF022041 | 1737 |
|                   |                 |             |          |      |
| Achipteriidae     | sexual          | 65,811,786  | EF091418 | 1771 |
| Arceremaeidae     | sexual          | 1,083,148   | KR081635 | 1820 |
| Caleremaeidae     | sexual          | 23,555,599  | OL839305 | 1781 |
| Caleremaeidae     | sexual          | 1,188,961   | KR081610 | 1809 |
| Carabodidae       | sexual          | 21,693,835  | EF093787 | 1799 |
| Carabodidae       | sexual          | 78,972,550  | KX397629 | 1822 |
| Carabodidae       | sexual          | 28,213,333  | EF091429 | 1789 |
| Carabodidae       | sexual          | 141,300     | KY922219 | 1777 |
| Cepheidae         | sexual          | 13,280,000  | OL839306 | 1795 |
| Cepheidae         | sexual          | 78,984,623  | EU432206 | 1624 |
| Ceratoppiidae     | sexual          | 81,592,031  | EU432204 | 1624 |
| Ceratozetidae     | sexual          | 2,951,293   | MH198178 | 1827 |
| Ceratozetidae     | sexual          | 30,330,851  | AF022030 | 1815 |
| Ceratozetidae     | sexual          | 24,538,068  | EU432194 | 1625 |
| Ceratozetidae     | sexual          | 63,193,507  | EU432195 | 1625 |
| Chamobatidae      | sexual          | 54,100,000  | EU432188 | 1624 |
| Chamobatidae      | sexual          | 26,517,528  | EU432190 | 1624 |
| Chamobatidae      | sexual          | 30,330,851  | EU432189 | 1624 |
| Cymbaeremaeidae   | sexual          | 54,107,096  | EU432201 | 1624 |
| Cymbaeremaeidae   | sexual          | 1,252,700   | LC367334 | 1797 |
| Cymbaeremaeidae   | sexual          | 331,212     | EU433989 | 1823 |
| Damaeidae         | sexual          | 21,583,049  | KR081607 | 1824 |
| Damaeidae         | sexual          | 1,027,373   | KR081608 | 1792 |
| Damaeidae         | parthenogenetic | 24,683,049  | MH198179 | 1810 |
| Damaeidae         | sexual          | 33,909,724  | MH198180 | 1825 |
| Dampfiellidae     | sexual          | 109,820     | KR081602 | 1719 |
| Eremaeidae        | sexual          | 78,837,107  | GQ864287 | 1671 |
| Eremaozetidae     | sexual          | 97,000,000  | EU432187 | 1639 |



|                  |                 |             |          |      |
|------------------|-----------------|-------------|----------|------|
| Galumnidae       | sexual          | 101,240,508 | GQ864304 | 1664 |
| Galumnidae       | sexual          | 54,431,212  | KX397630 | 1809 |
| Galumnidae       | sexual          | 1,069,353   | KJ423065 | 686  |
| Gymnodamaeidae   | sexual          | 77,000,000  | KR081614 | 1802 |
| Haplozetidae     | sexual          | 56,194,140  | AB818529 | 1824 |
| Haplozetidae     | parthenogenetic | 81,935,554  | HM070342 | 1734 |
| Haplozetidae     | sexual          | 2,079,472   | KR081633 | 1795 |
| Hemileiidae      | sexual          | 7,512,190   | AB818531 | 1806 |
| Hermanniellidae  | sexual          | 283,561     | KR081601 | 1824 |
| Hermanniellidae  | sexual          | 19,000,000  | KR081617 | 1824 |
| Liacaridae       | sexual          | 24,308,220  | GQ864286 | 1671 |
| Liacaridae       | sexual          | 23,114,644  | KR081619 | 1824 |
| Liebstadiidae    | sexual          | 42,746,545  | KR081620 | 1803 |
| Microtegeidae    | sexual          | 19,000,000  | KR081622 | 1807 |
| Mochlozetidae    | sexual          | 331,212     | KR081636 | 1826 |
| Neoliodidae      | sexual          | 54,247,516  | EF203779 | 1515 |
| Oppiidae         | sexual          | 294,507     | OL839303 | 1753 |
| Oppiidae         | sexual          | 56,030,512  | MH198181 | 1823 |
| Oppiidae         | sexual          | 1,563,557   | KR081612 | 1820 |
| Oppiidae         | sexual          | 30,551,219  | OL839304 | 1816 |
| Oppiidae         | parthenogenetic | 148,940,000 | KR081626 | 1751 |
| Oribatellidae    | sexual          | 4,057,842   | KT781157 | 1593 |
| Oribatulidae     | sexual          | 66,804,690  | AB818530 | 1837 |
| Oribatulidae     | sexual          | 77,007,096  | EU433990 | 1819 |
| Oribatulidae     | sexual          | 21,730,566  | EU432198 | 1648 |
| Oribellidae      | sexual          | 54,414,915  | MH198177 | 741  |
| Phenopelopidae   | sexual          | 63,121,316  | EU432192 | 1624 |
| Phenopelopidae   | sexual          | 55,928,639  | EF091419 | 1807 |
| Pheroliodidae    | sexual          | 19,000,000  | KR081628 | 1732 |
| Plasmobatidae    | sexual          | 1,288,006   | KR081634 | 1791 |
| Protoribatidae   | parthenogenetic | 134,940,000 | AB818528 | 1798 |
| Punctoribatidae  | sexual          | 56,011,960  | MH198175 | 1606 |
| Rhynchoribatidae | sexual          | 1,279,996   | KR081632 | 1824 |

|                 |                 |             |          |      |
|-----------------|-----------------|-------------|----------|------|
| Scheloribatidae | sexual          | 10,180,000  | EU432199 | 1627 |
| Scheloribatidae | sexual          | 73,227,370  | KR081616 | 1801 |
| Scheloribatidae | sexual          | 134,940,000 | AB818527 | 1800 |
| Scutoverticidae | sexual          | 115,940,000 | GQ864305 | 1679 |
| Tectocepheidae  | parthenogenetic | 31,375,952  | EF093778 | 1805 |
| Tectocepheidae  | parthenogenetic | 148,940,000 | EF093781 | 1805 |
| Tetracondylidae | sexual          | 294,597     | MG719344 | 1717 |
| Tetracondylidae | sexual          | 283,561     | KR081631 | 1797 |
| Xenillidae      | sexual          | 26,267,488  | EU432203 | 1624 |
| Xenillidae      | sexual          | 55,937,108  | KR081637 | 1826 |
| Zetorchestidae  | sexual          | 786,000     | MK014975 | 1744 |
|                 |                 |             |          |      |
| Demodicidae     | sexual          |             | HQ727999 | 1822 |
| Erythraeidae    | sexual          |             | LC260406 | 1794 |
| Ascoidea        | sexual          |             | MG547400 | 1473 |
| Polyaspididae   | sexual          |             | KY922099 | 1756 |
| Holothyridae    | sexual          |             | AY620912 | 1774 |
| Opilioacaridae  | sexual          |             | AF115375 | 1784 |
| Opilioacaridae  | sexual          |             | AF287235 | 1747 |
| Opilioacaridae  | sexual          |             | MF281419 | 1706 |
