# Supplementary material for: “Jack‐of‐all‐trades” is parthenogenetic
Source: PubMed Central journal article supplement (PMC9219104; doi:10.1002/ece3.9036), 2022-06-23
Supplement: ECE3-12-e9036-s004.pdf [file ECE3-12-e9036-s004.pdf]

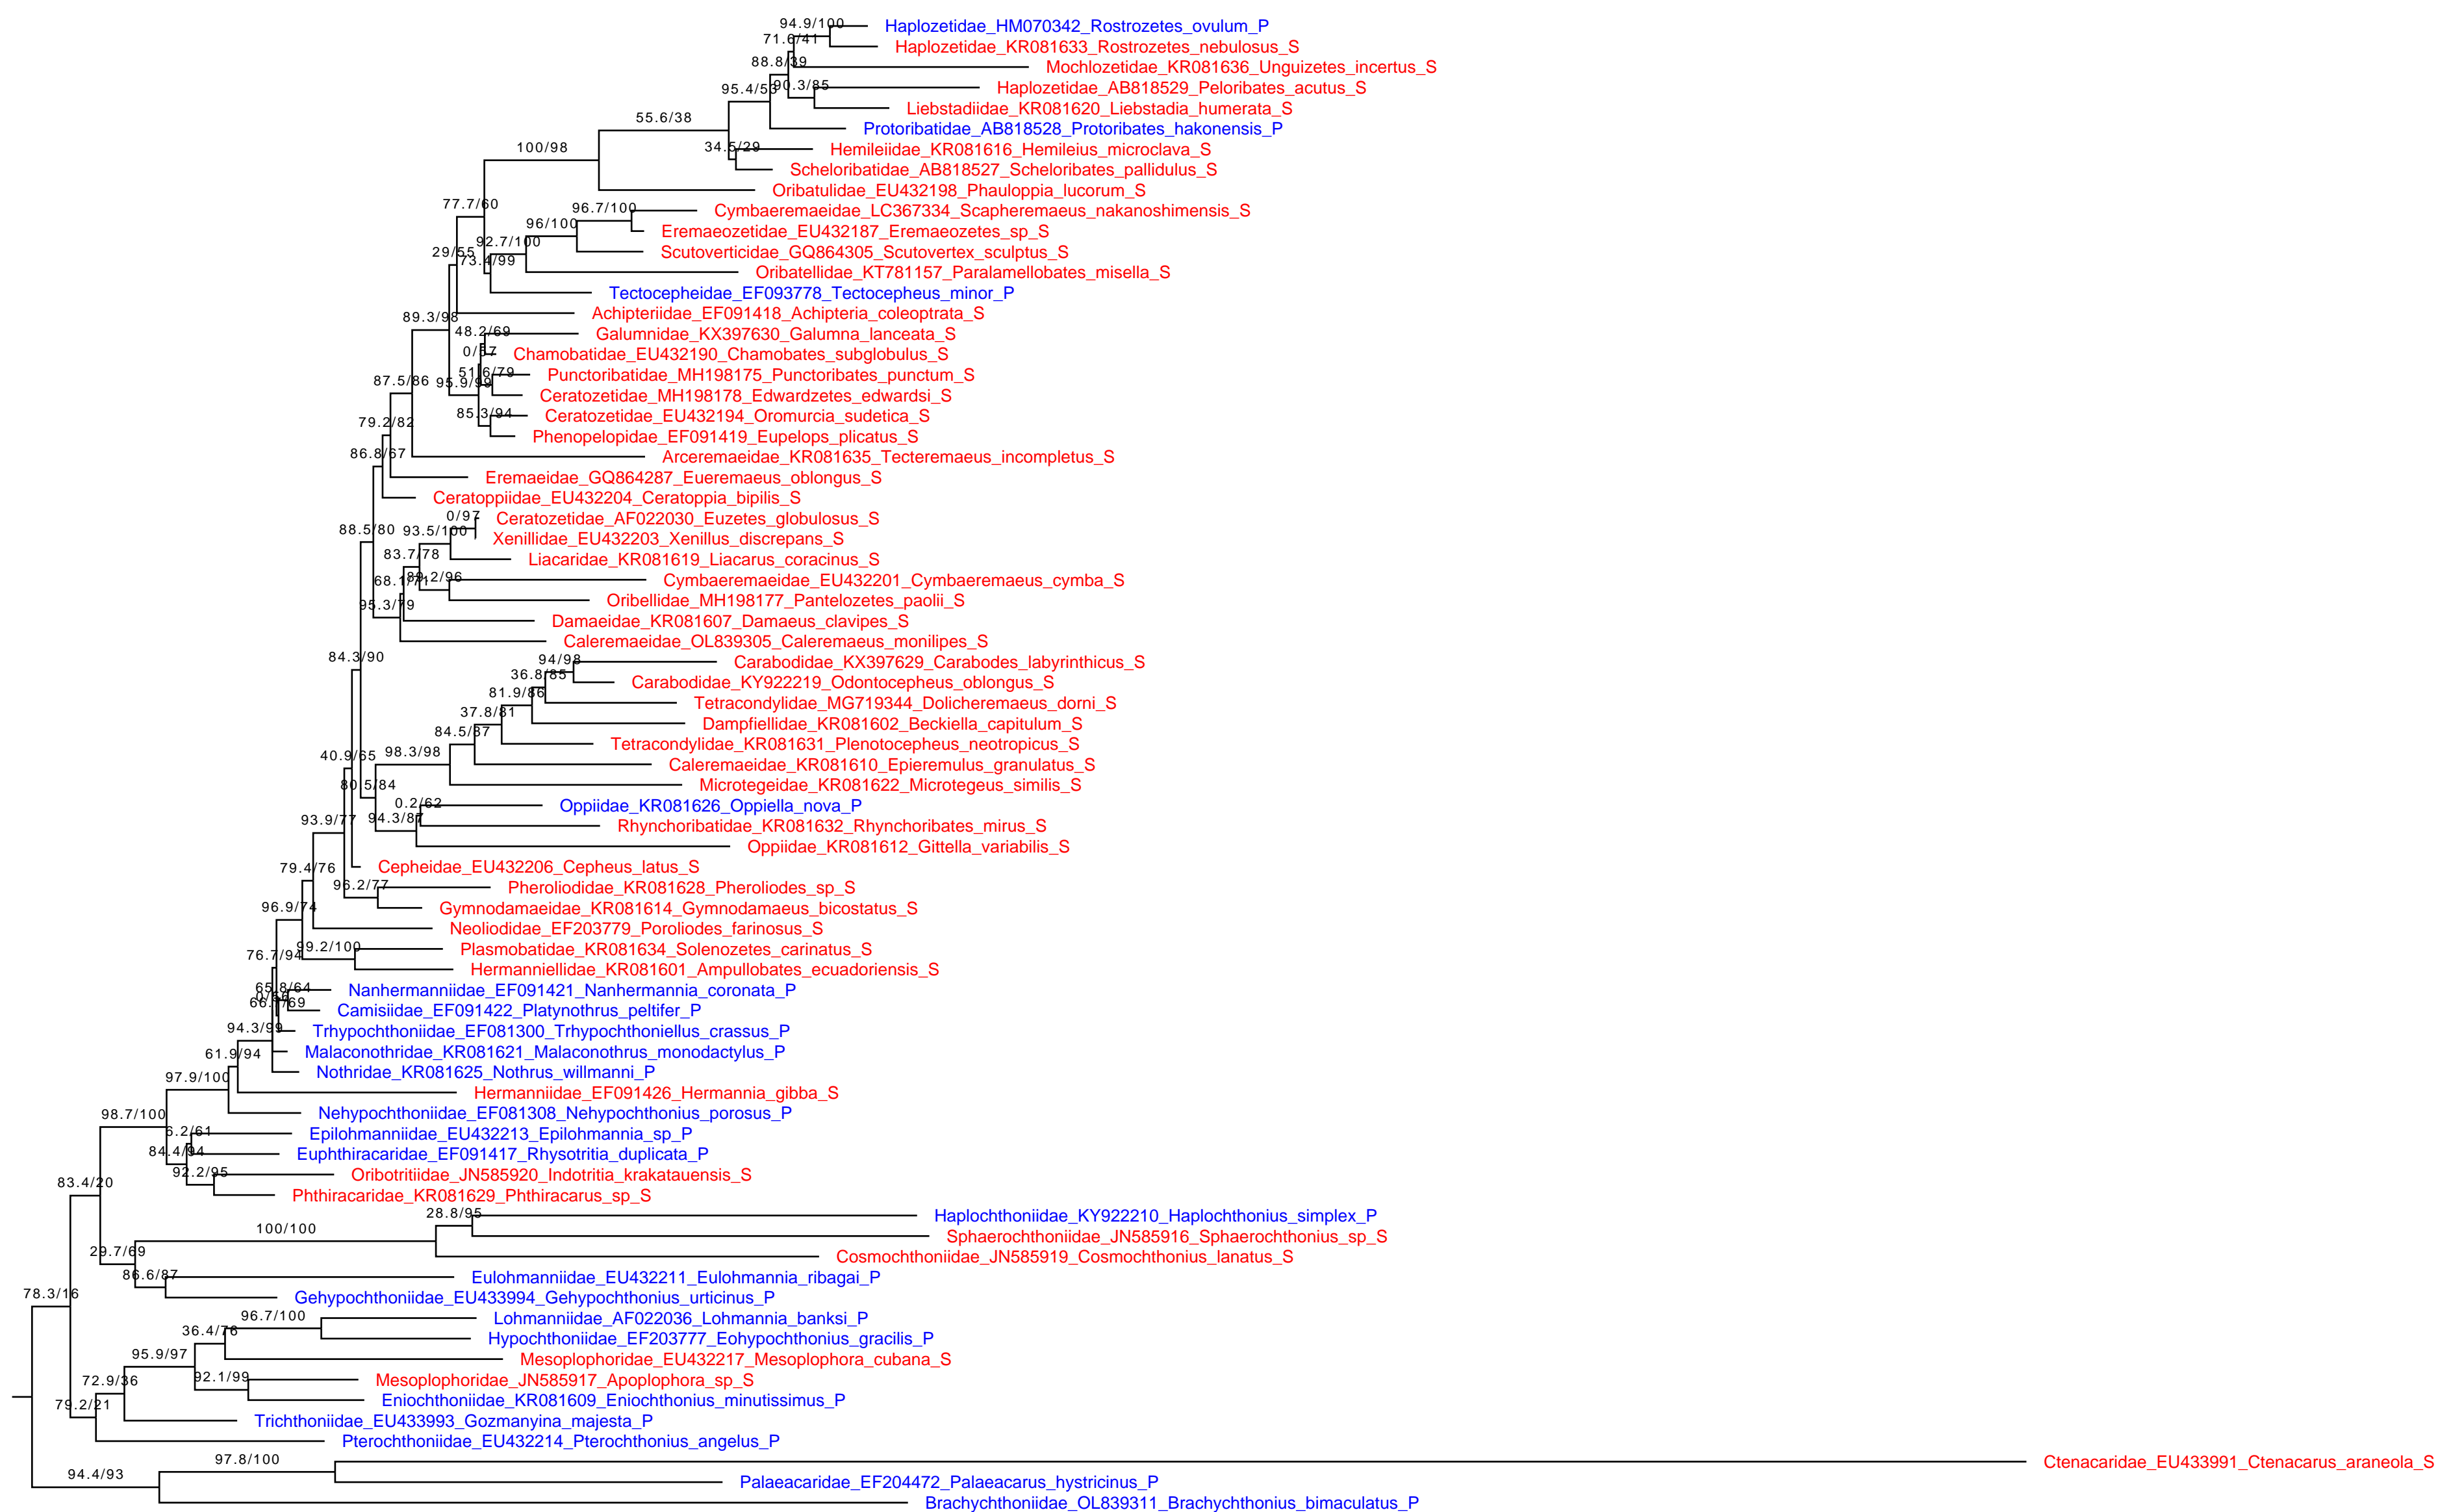

0.09
